# Supplementary material for: Why can a gold salt react as a base?
Source: Royal Society of Chemistry journal article supplement (doi:10.1039/c7ob01905j), 2017-01-01
Supplement: c7ob01905j1.pdf [file c7ob01905j1.pdf]

## SUPPORTING INFORMATION

### Role of the gold-gold interaction in C-H activation of acetone

Mariarosa Anania, Lucie Jašíková, Juraj Jašík, and Jana Roithová\*

\*Correspondence to: [roithova@natur.cuni.cz](mailto:roithova@natur.cuni.cz)

#### Contents

|                                                                                            |     |
|--------------------------------------------------------------------------------------------|-----|
| Preparation of reaction mixtures.....                                                      | S2  |
| Reaction with cyclohexanone.....                                                           | S3  |
| IRPD, IRMPD and theoretical IR spectra for [Au(PMe <sub>3</sub> )(SbF <sub>6</sub> )]..... | S4  |
| Kinetic isotope effect (KIE).....                                                          | S6  |
| Formation of gold acetonyl complexes in time.....                                          | S30 |
| C-H activation.....                                                                        | S35 |
| ESI-MS source and CID spectra.....                                                         | S41 |
| IRPD spectrum for [Au(IPr)(BF <sub>4</sub> )].....                                         | S44 |
| Computational results.....                                                                 | S45 |

## Preparation of reaction mixtures

### A) Solutions of gold complexes:

Gold chloride (L)AuCl (L = PMe<sub>3</sub>, PPh<sub>3</sub>) (5 μmol) was dissolved in dry THF (1 ml) and mixed with the solution of AgX (X = SbF<sub>6</sub>, PF<sub>6</sub>, OTf, NTf<sub>2</sub>) (1.2 eq) in dry THF (1 ml). The reaction mixture was sonicated for 10 minutes and filtered through a PTFE filter (pore size 0.2 μm) to remove precipitated AgX.

Purchased gold complexes [Au(L)(CH<sub>3</sub>CN)]SbF<sub>6</sub> (L = JohnPhos) and [Au(L)(CH<sub>3</sub>CN)]BF<sub>4</sub> (L = IPr) were dissolved in THF (1 ml).

The stock solutions were stored for no longer than 2 days.

### B) MS samples for labelling experiments:

The samples for measurements of labelling experiments were obtained by diluting a solution of (L)AuX or [Au(JohnPhos)(CH<sub>3</sub>CN)]SbF<sub>6</sub> or [Au(IPr)(CH<sub>3</sub>CN)]BF<sub>4</sub> (200 μL) with dry THF (600 μL). The solution was mixed with a 1:1 mixture of acetone and acetone-d<sub>6</sub>. The specific percentage of water is then added.

The obtained solutions were immediately monitored by ESI-MS.

### C) Preparation of reaction mixtures:

- 1) (PMe<sub>3</sub>)Au(SbF<sub>6</sub>):** The complex solution was prepared by dissolving 1.54 mg of (PMe<sub>3</sub>)AuCl (5 μmol) in 1 ml of dry THF and 2.06 mg of AgSbF<sub>6</sub> (6 μmol) in 1 ml of dry THF. This two solution are then mixed in the same vial and put in ultrasonic bath for ten minutes in order to get a 2.5 mM solution of gold complex [(PMe<sub>3</sub>)Au]<sup>+</sup>[SbF<sub>6</sub>]<sup>-</sup> in 2 ml of THF. The white precipitate of AgCl which is obtained is then filtered away.
- 2) (PMe<sub>3</sub>)Au(PF<sub>6</sub>):** The complex solution was prepared by dissolving 1.54 mg of [(PMe<sub>3</sub>)AuCl] (5 μmol) in 1 ml of dry THF and 1.5 mg AgPF<sub>6</sub> (6 μmol) in 1 ml of dry THF. This two solution are then mixed in the same vial and put in ultrasonic bath for ten minutes in order to get a 2.5 mM solution of gold complex [(PMe<sub>3</sub>)Au]<sup>+</sup>[PF<sub>6</sub>]<sup>-</sup> in 2 ml of THF. The white precipitate of AgCl which is obtained is then filtered away.
- 3) (PMe<sub>3</sub>)Au(OTf):** The complex solution was prepared by dissolving 1.54 mg of [(PMe<sub>3</sub>)AuCl] (5 μmol) in 1 ml of dry THF and 1.28 mg AgOTf (6 μmol) in 1 ml of dry THF. This two solution are then mixed in the same vial and put in ultrasonic bath for ten minutes in order to get a 2.5 mM solution of gold complex [(PMe<sub>3</sub>)Au]<sup>+</sup>[OTf]<sup>-</sup> in 2 ml of THF. The white precipitate of AgCl which is obtained is then filtered away.
- 4) (PMe<sub>3</sub>)Au(NTf<sub>2</sub>):** The complex solution was prepared by dissolving 1.54 mg of (PMe<sub>3</sub>)AuCl (5 μmol) in 1 ml of dry THF and 1.94 mg AgNTf<sub>2</sub> (6 μmol) in 1 ml of dry THF. This two solution are then mixed in the same vial and put in ultrasonic bath for ten minutes in order to get a 2.5 mM solution of gold complex [(PMe<sub>3</sub>)Au]<sup>+</sup>[NTf<sub>2</sub>]<sup>-</sup> in 2 ml of THF. The white precipitate of AgCl which is obtained is then filtered away.
- 5) (PPh<sub>3</sub>)Au(SbF<sub>6</sub>):** The complex solution was prepared by dissolving 2.48 mg of [(PPh<sub>3</sub>)AuCl] (5 μmol) in 1 ml of dry THF and 2.06 mg of AgNTf<sub>2</sub> (6 μmol) in 1 ml of dry THF. This two solution are then mixed in the same vial and put in ultrasonic bath for ten minutes in order to get a 2.5 mM solution of gold complex [(PPh<sub>3</sub>)Au]<sup>+</sup>[SbF<sub>6</sub>]<sup>-</sup> in 2 ml of THF. The white precipitate of AgCl which is obtained is then filtered away.
- 6) (PPh<sub>3</sub>)Au(NTf<sub>2</sub>):** The complex solution was prepared by dissolving 2.48 mg of [(PPh<sub>3</sub>)AuCl] (5 μmol) in 1 ml of dry THF and 1.94 mg of AgNTf<sub>2</sub> (6 μmol) in 1 ml of dry THF. This two solution are then mixed in the same vial and put in ultrasonic bath for ten minutes in order to get a 2.5 mM solution of gold complex [(PPh<sub>3</sub>)Au]<sup>+</sup>[NTf<sub>2</sub>]<sup>-</sup> in 2 ml of THF. The white precipitate of AgCl which is obtained is then filtered away.
- 7) (JohnPhos)Au(CH<sub>3</sub>CN)(SbF<sub>6</sub>):** The complex solution was prepared by dissolving 1.93 mg of [(JohnPhos)Au(SbF<sub>6</sub>)] (5 μmol) in 1 ml of dry THF. The solution is ready to be used as a stock solution.

- 8) **(IPr)Au(CH<sub>3</sub>CN)(BF<sub>4</sub>)**: The complex solution was prepared by dissolving 1.79 mg of [(IPr)Au(ACN)(BF<sub>4</sub>) (5 μmol) in 1 ml of dry THF. The solution is ready to be used as a stock solution.
- 9) **(IPr)<sub>2</sub>Au<sub>2</sub>(OH)(BF<sub>4</sub>)**: The complex solution was prepared by dissolving 3.158 mg of gold(I) complex [(IPr)<sub>2</sub>Au<sub>2</sub>(OH)]<sup>+</sup> BF<sub>4</sub><sup>-</sup> (5 μmol) in 1 ml of dry THF.
- 10) **(IPr)Au(OTf)**: The complex solution was prepared by dissolving 3.08 mg of [(IPr)Au(Cl)] (5 μmol) in 1 ml of dry dioxane and 1.28 mg AgOTf (6 μmol) in 1 ml of dry dioxane. This two solution are then mixed in the same vial and put in ultrasonic bath for ten minutes in order to get a 2.5 mM solution of gold complex [(IPr)Au]<sup>+</sup>[OTf]<sup>-</sup> in 2 ml of THF. The white precipitate of AgCl which is obtained is then filtered away.
- 11) **(IPr)Au(NTf<sub>2</sub>)**: The complex solution was prepared by dissolving 3.08 mg of [(IPr)Au(Cl)] (5 μmol) in 1 ml of dry dioxane and 1.94 mg AgOTf (6 μmol) in 1 ml of dry dioxane. This two solution are then mixed in the same vial and put in ultrasonic bath for ten minutes in order to get a 2.5 mM solution of gold complex [(IPr)Au]<sup>+</sup>[NTf<sub>2</sub>]<sup>-</sup> in 2 ml of THF. The white precipitate of AgCl which is obtained is then filtered away.

## Reaction of [Au(IPr)(OTf)] with cyclohexanone in dioxane/water solution.

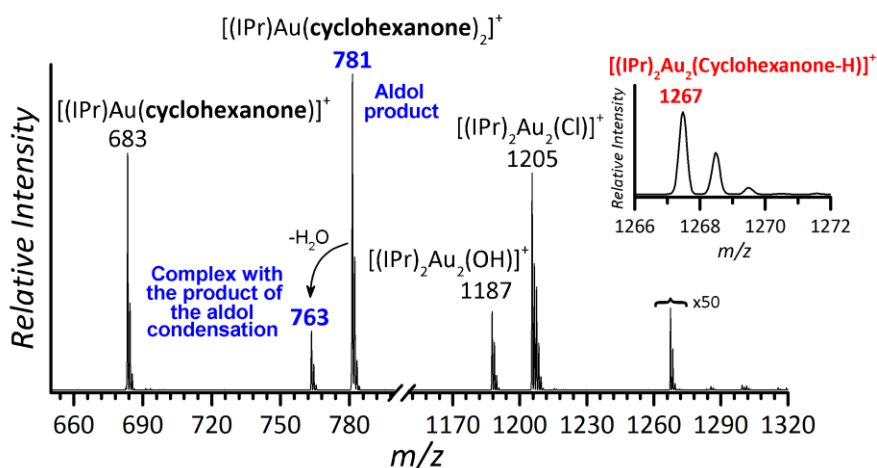

**Figure S1:** ESI-MS source spectrum of the [(IPr)Au(OTf)] (184 μg) complex in dry dioxane (0.1 ml) after the addition of cyclohexanone (0.1 mL) and 0.1 mL of H<sub>2</sub>O. The spectrum clearly shows formation of the digold kenonyl complex (m/z 1267). More importantly, it reveals aldol reaction (m/z 781) and subsequent water elimination (m/z 763).

## IRPD, IRMPD and theoretical IR spectra for $[\text{Au}(\text{PMe}_3)(\text{SbF}_6)]$

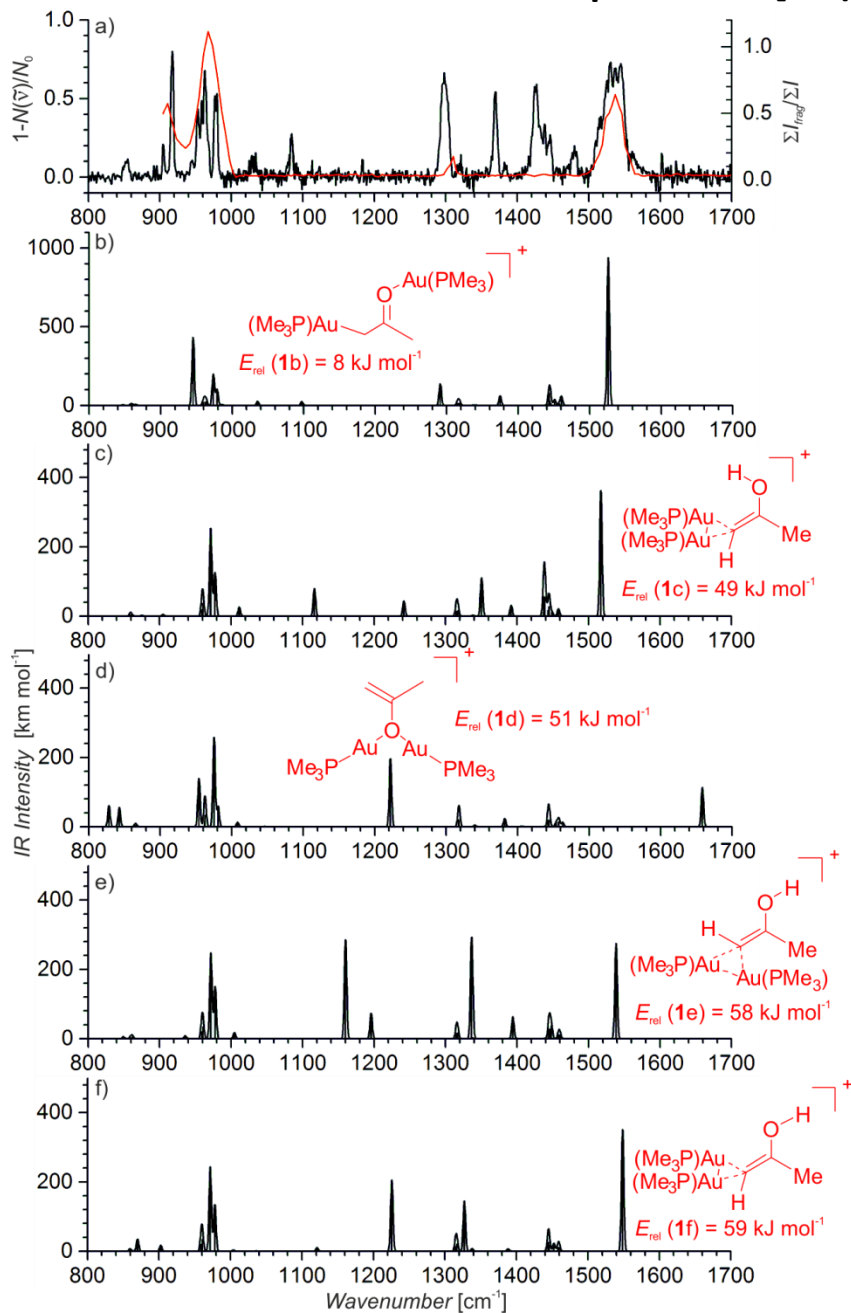

**Figure S2:** a) IRPD and IRMPD (an experiment from the CLIO facility in France) experimental spectra (black and red lines respectively) of the mass selected ion  $[(\text{PMe}_3)_2\text{Au}_2(\text{CH}_2\text{COCH}_3)]^+$  with  $m/z$  603. Theoretical IR spectra (B3LYP-D3/6-311+G\*(SDD: Au); scaling factor: 0.975) of different isomers of  $[(\text{PMe}_3)_2\text{Au}_2(\text{CH}_2\text{COCH}_3)]^+$  b) **1b**, c) **1c**, d) **1d**, e) **1e**, and f) **1f**.



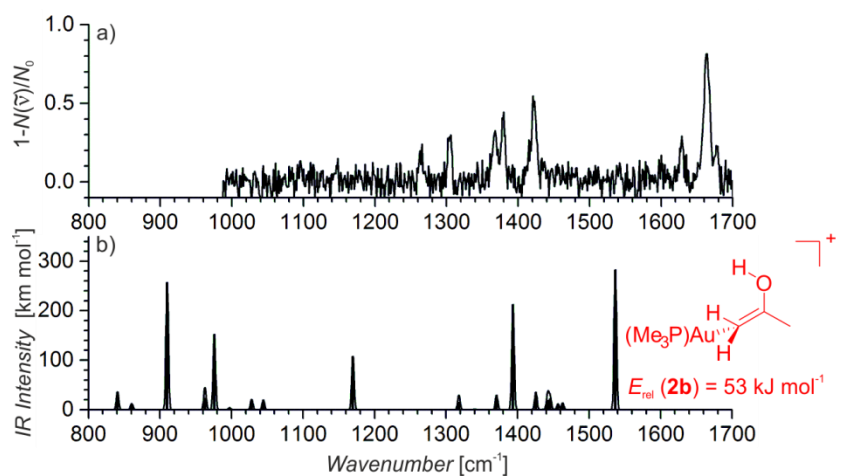

**Figure S3:** a) IRPD experimental spectrum of the mass selected ion  $[(\text{PMe}_3)\text{Au}(\text{CH}_3\text{COCH}_3)]^+$  with  $m/z$  331. b) Theoretical IR spectrum (B3LYP-D3/6-311+G\*(SDD: Au); scaling factor: 0.975) of isomer **2b** of  $[(\text{PMe}_3)\text{Au}(\text{CH}_3\text{COCH}_3)]^+$ .

## Kinetic Isotope Effect (KIE)

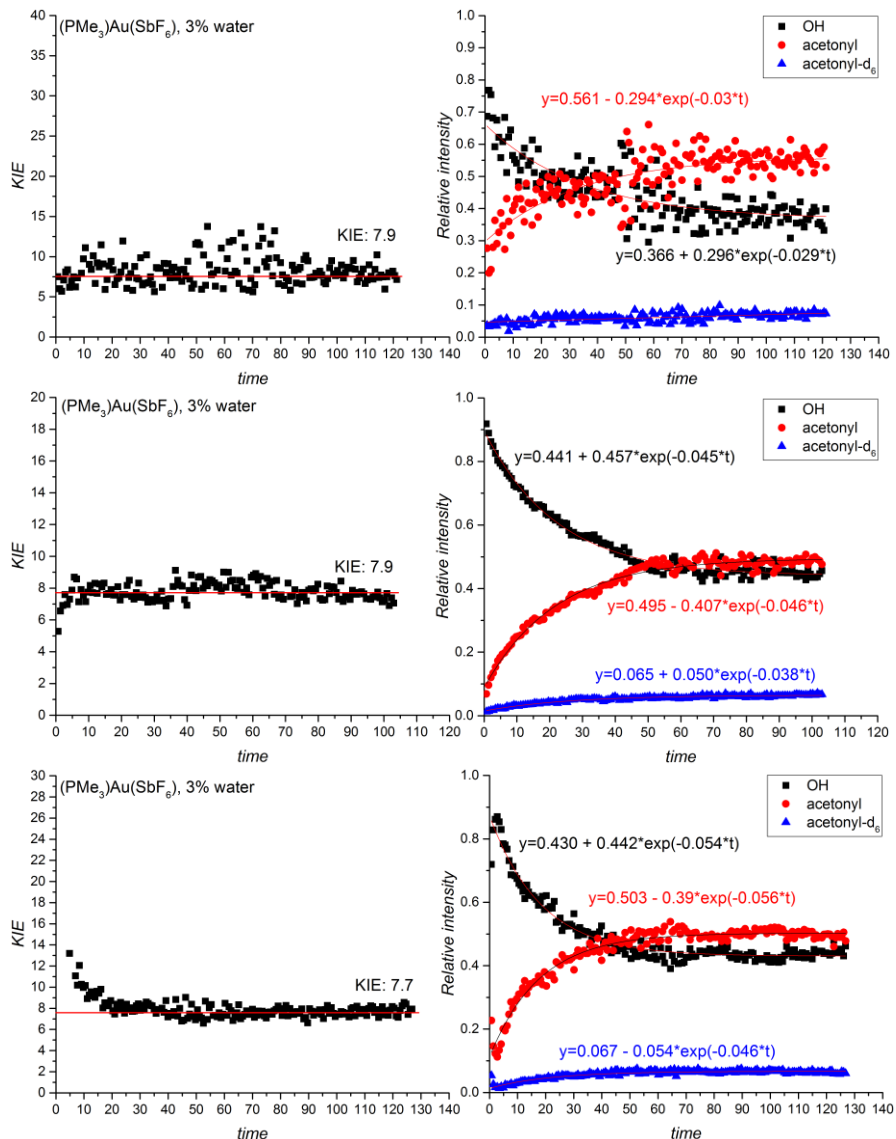

**Figure S4:** KIE as a function of time for the  $(\text{PMe}_3)_3\text{Au}(\text{SbF}_6)$  complex after addition of 3% of water to the total volume of the solution. **OH** =  $(\text{PMe}_3)_2\text{Au}_2(\text{OH})$ , **acetonyl** =  $(\text{PMe}_3)_2\text{Au}_2(\text{CH}_2\text{COCH}_3)$ , **acetonyl- $\text{d}_6$**  =  $(\text{PMe}_3)_2\text{Au}_2(\text{CD}_2\text{COCD}_3)$ .

KIE:  $(\text{PMe}_3)_2\text{Au}_2(\text{CH}_2\text{COCH}_3) / (\text{PMe}_3)_2\text{Au}_2(\text{CD}_2\text{COCD}_3)$ .

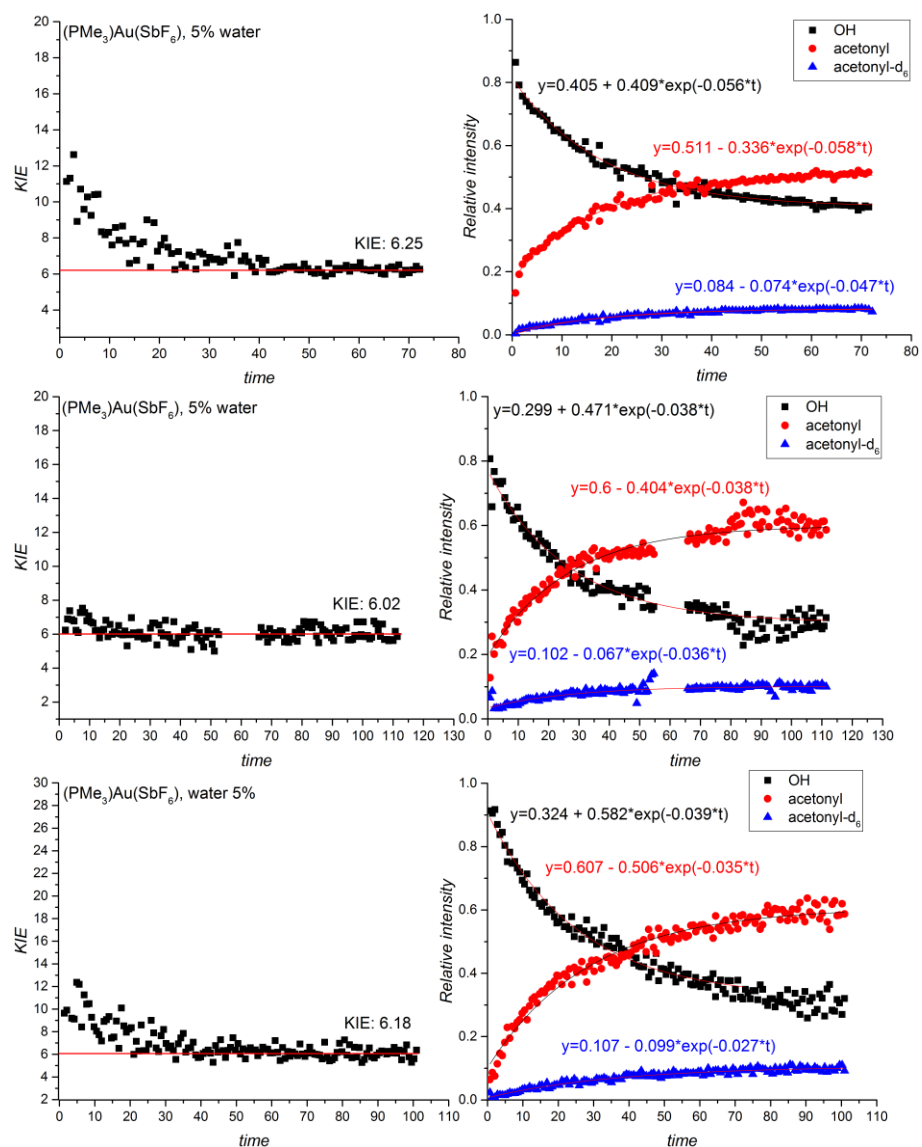

**Figure S5:** KIE as a function of time for the  $(\text{PMe}_3)_3\text{Au}(\text{SbF}_6)$  complex after addition of 5% of water to the total volume of the solution. **OH** =  $(\text{PMe}_3)_2\text{Au}_2(\text{OH})$ , **acetonyl** =  $(\text{PMe}_3)_2\text{Au}_2(\text{CH}_2\text{COCH}_3)$ , **acetonyl- $\text{d}_6$**  =  $(\text{PMe}_3)_2\text{Au}_2(\text{CD}_2\text{COCd}_3)$ .

KIE:  $(\text{PMe}_3)_2\text{Au}_2(\text{CH}_2\text{COCH}_3) / (\text{PMe}_3)_2\text{Au}_2(\text{CD}_2\text{COCd}_3)$ .

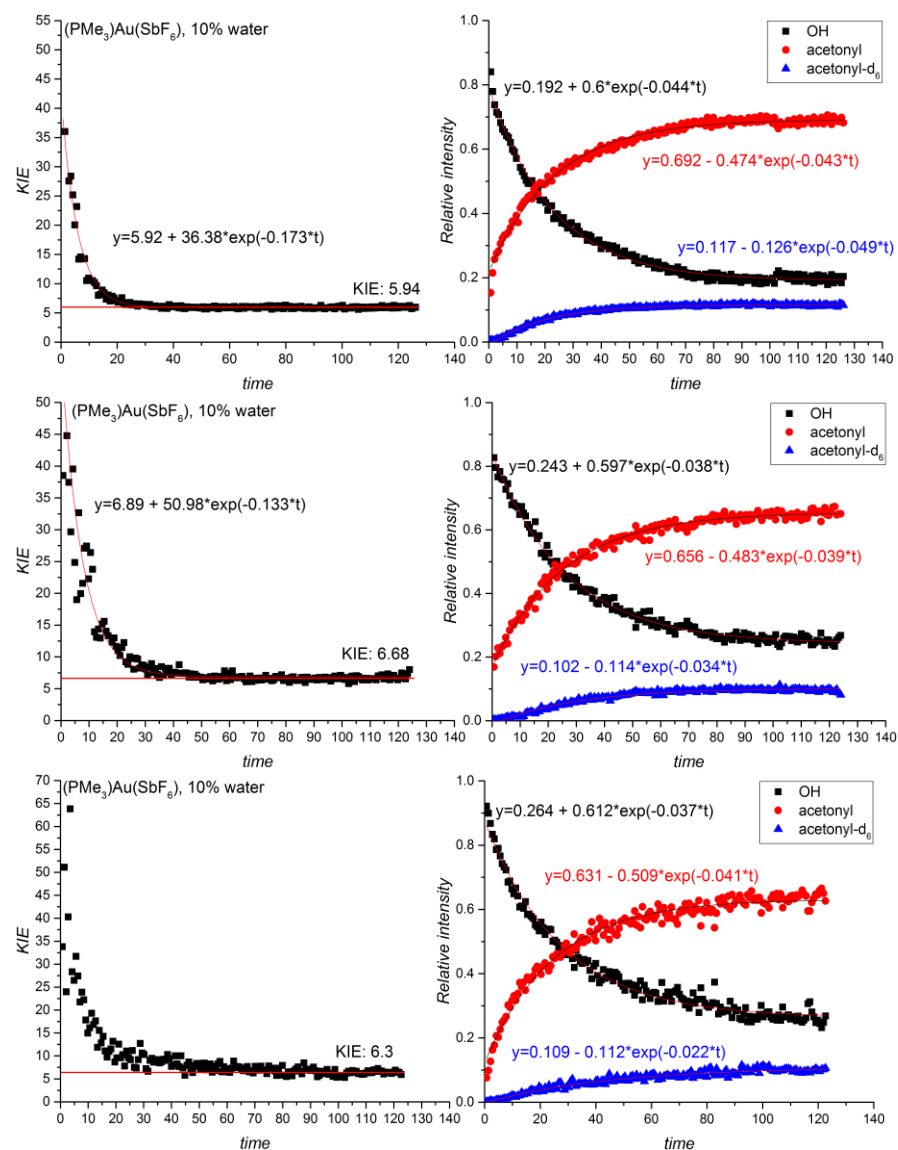

**Figure S6:** KIE as a function of time for the  $(\text{PMe}_3)_2\text{Au}_2(\text{SbF}_6)_2$  complex after addition of 10% of water to the total volume of the solution. **OH** =  $(\text{PMe}_3)_2\text{Au}_2(\text{OH})$ , **acetonyl** =  $(\text{PMe}_3)_2\text{Au}_2(\text{CH}_2\text{COCH}_3)$ , **acetonyl- $\text{d}_6$**  =  $(\text{PMe}_3)_2\text{Au}_2(\text{CD}_2\text{COCD}_3)$ .

KIE:  $(\text{PMe}_3)_2\text{Au}_2(\text{CH}_2\text{COCH}_3) / (\text{PMe}_3)_2\text{Au}_2(\text{CD}_2\text{COCD}_3)$ .

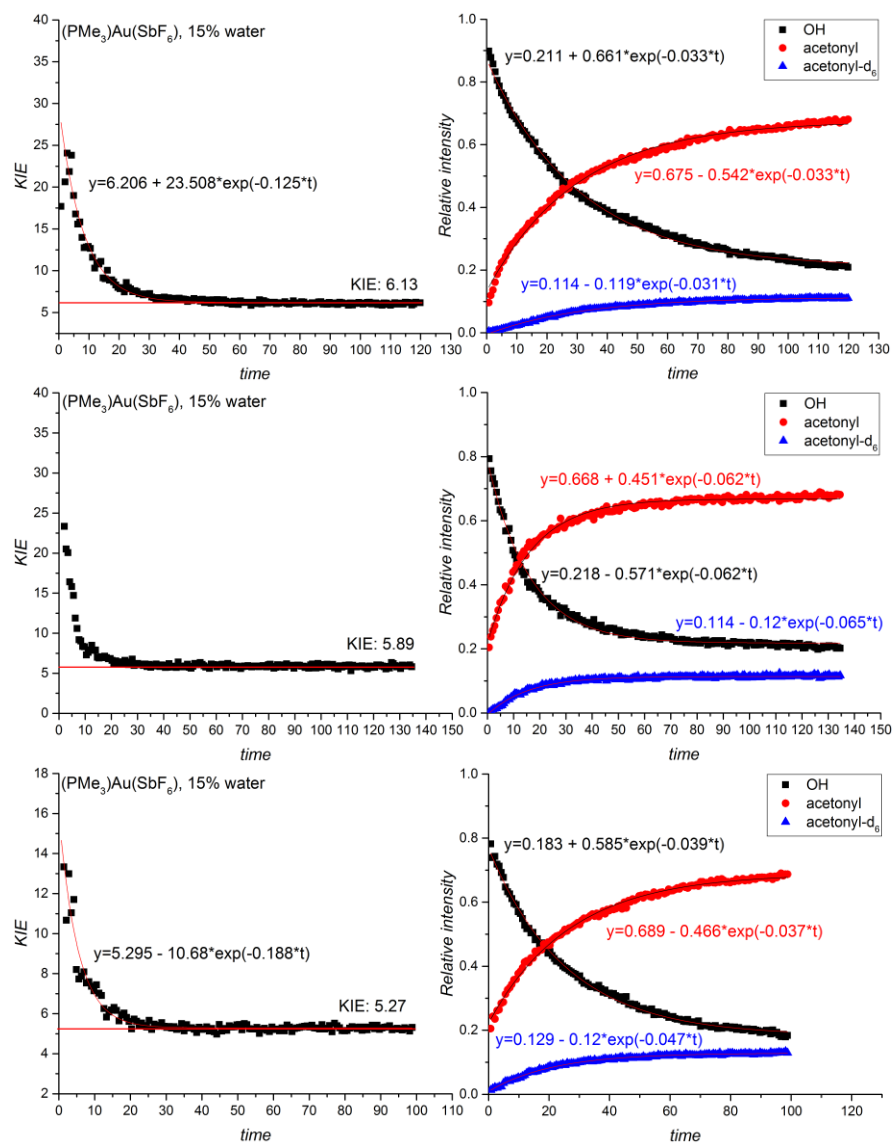

**Figure S7:** KIE as a function of time for the  $(\text{PMe}_3)_3\text{Au}(\text{SbF}_6)$  complex after addition of 15% of water to the total volume of the solution. **OH**=  $(\text{PMe}_3)_2\text{Au}_2(\text{OH})$ , **acetonyl**=  $(\text{PMe}_3)_2\text{Au}_2(\text{CH}_2\text{COCH}_3)$ , **acetonyl- $\text{d}_6$** =  $(\text{PMe}_3)_2\text{Au}_2(\text{CD}_2\text{COCD}_3)$ .

KIE:  $(\text{PMe}_3)_2\text{Au}_2(\text{CH}_2\text{COCH}_3)/(\text{PMe}_3)_2\text{Au}_2(\text{CD}_2\text{COCD}_3)$ .

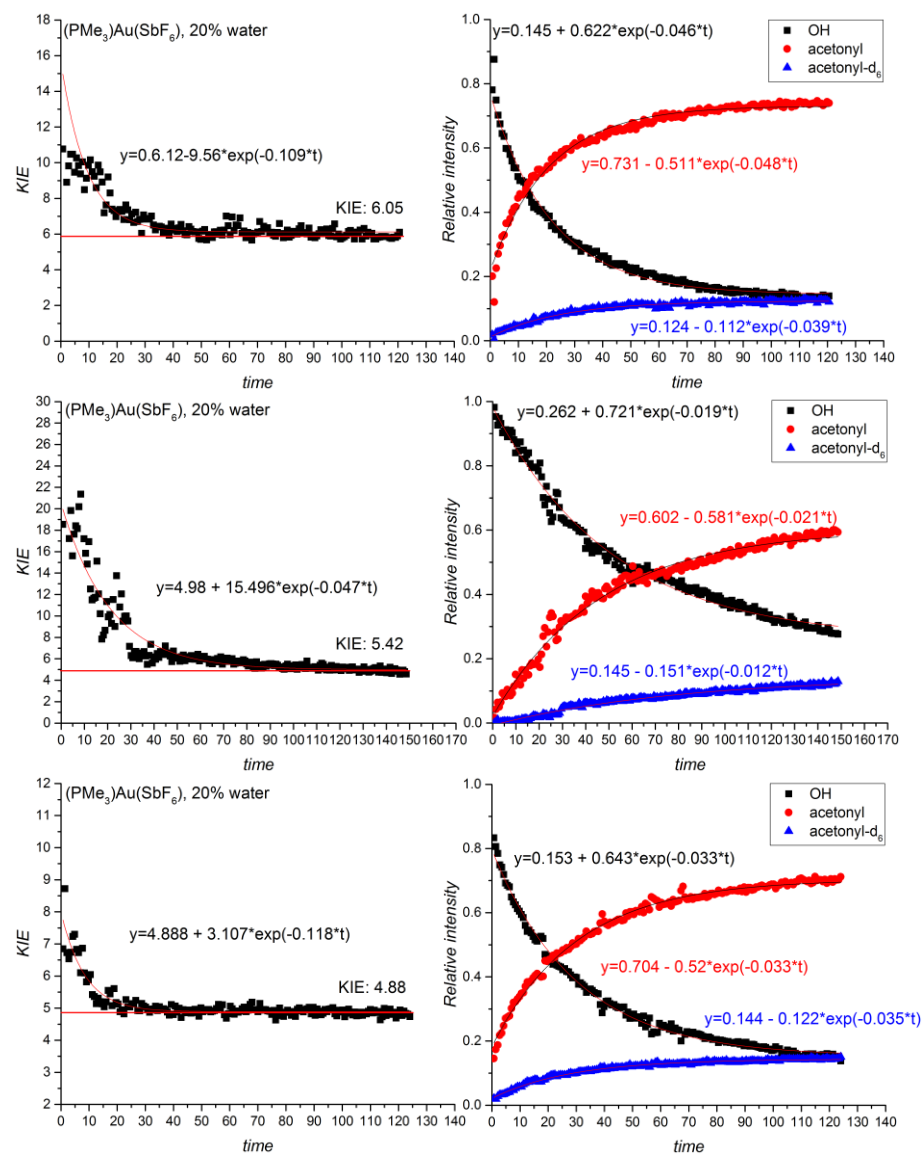

**Figure S8:** KIE as a function of time for the  $(\text{PMe}_3)_2\text{Au}_2(\text{SbF}_6)_2$  complex after addition of 20% of water to the total volume of the solution. **OH** =  $(\text{PMe}_3)_2\text{Au}_2(\text{OH})$ , **acetonyl** =  $(\text{PMe}_3)_2\text{Au}_2(\text{CH}_2\text{COCH}_3)$ , **acetonyl- $\text{d}_6$**  =  $(\text{PMe}_3)_2\text{Au}_2(\text{CD}_2\text{COCD}_3)$ .

KIE:  $(\text{PMe}_3)_2\text{Au}_2(\text{CH}_2\text{COCH}_3) / (\text{PMe}_3)_2\text{Au}_2(\text{CD}_2\text{COCD}_3)$ .

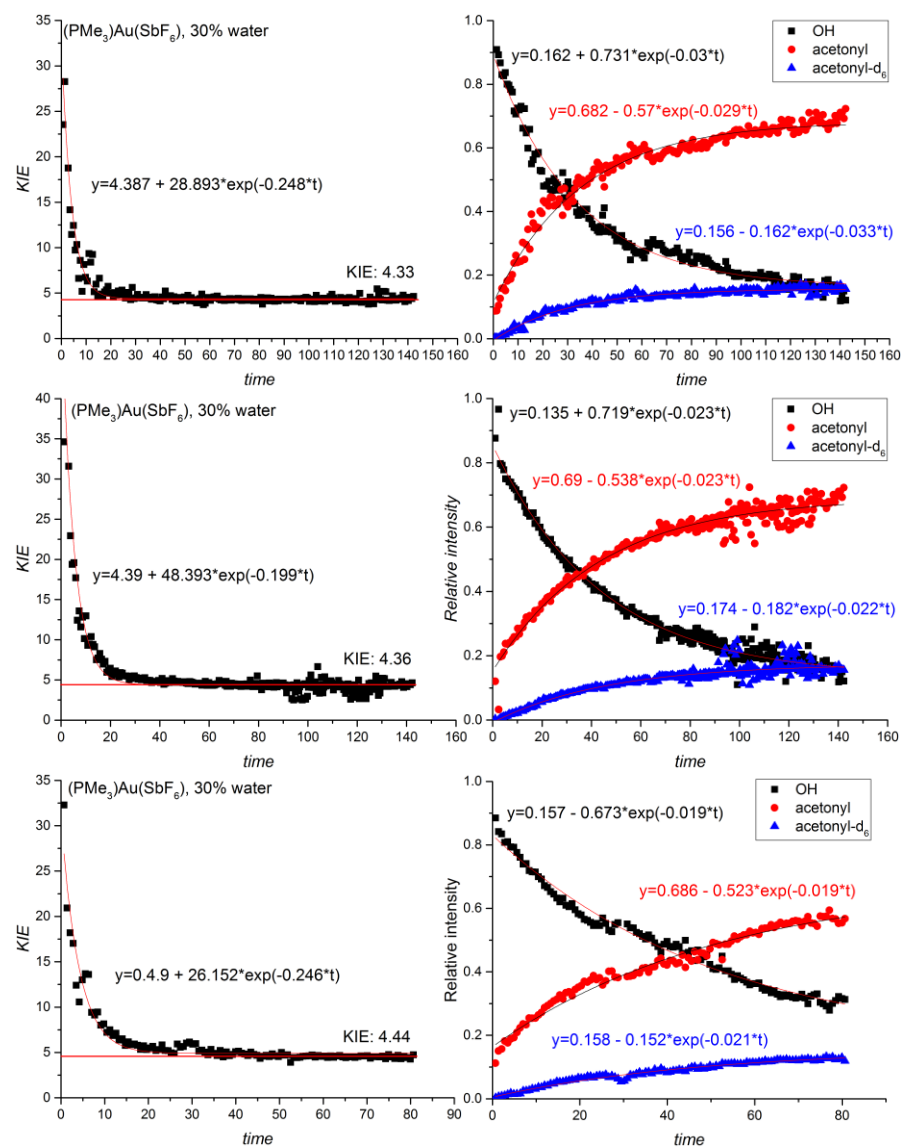

**Figure S9:** KIE as a function of time for the  $(\text{PMe}_3)_3\text{Au}(\text{SbF}_6)$  complex after addition of 30% of water to the total volume of the solution. **OH** =  $(\text{PMe}_3)_2\text{Au}_2(\text{OH})$ , **acetonyl** =  $(\text{PMe}_3)_2\text{Au}_2(\text{CH}_2\text{COCH}_3)$ , **acetonyl- $\text{d}_6$**  =  $(\text{PMe}_3)_2\text{Au}_2(\text{CD}_2\text{COCD}_3)$ .

KIE:  $(\text{PMe}_3)_2\text{Au}_2(\text{CH}_2\text{COCH}_3)/(\text{PMe}_3)_2\text{Au}_2(\text{CD}_2\text{COCD}_3)$ .

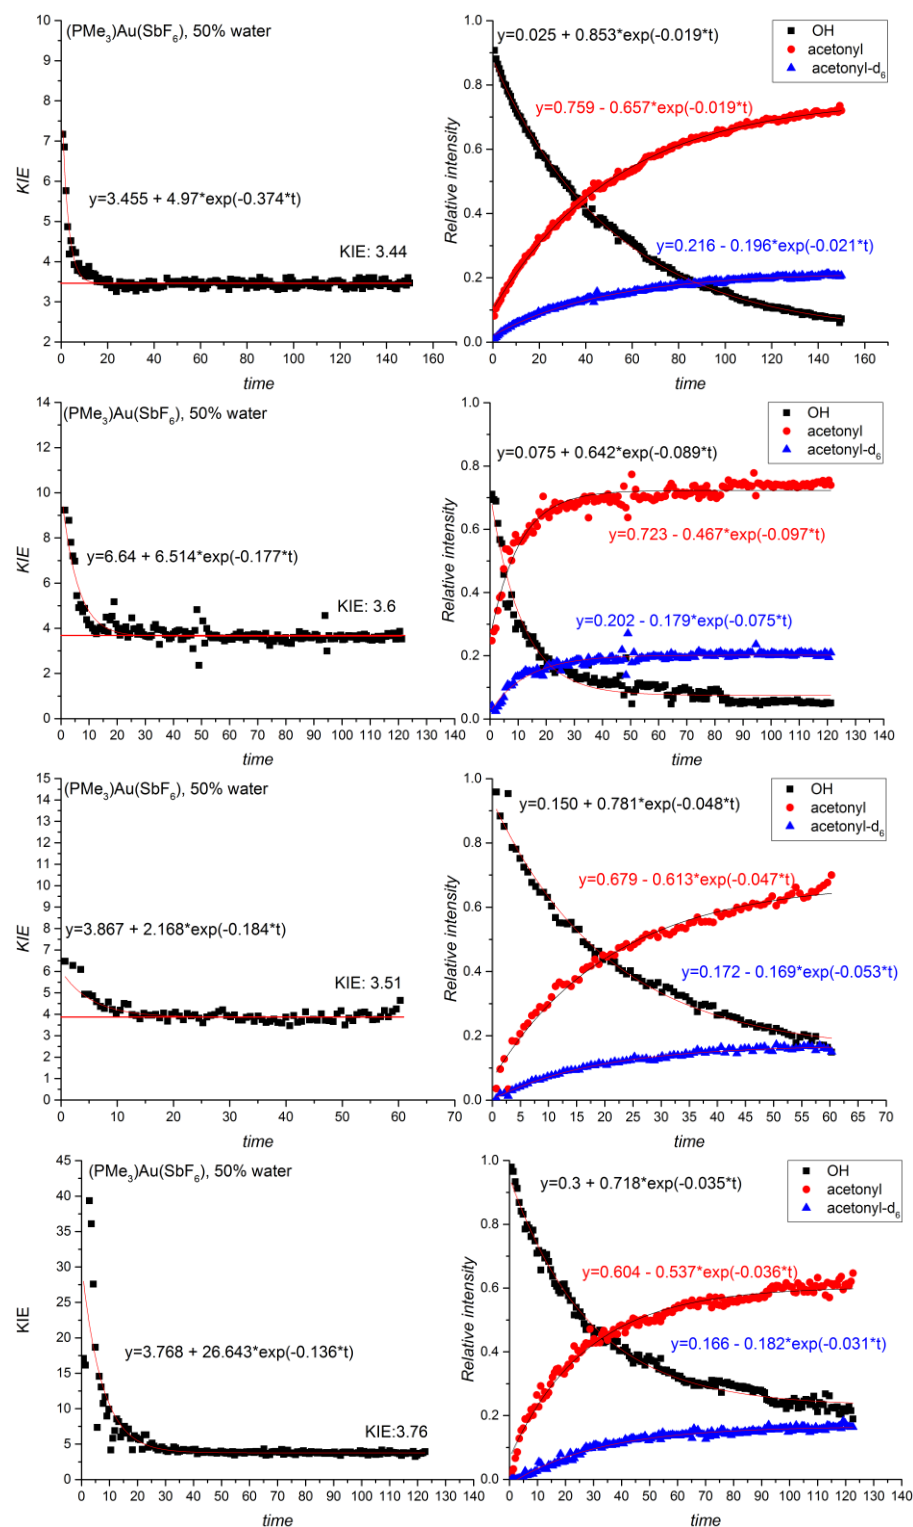

**Figure S10:** KIE as a function of time for the  $(\text{PMe}_3)_3\text{Au}(\text{SbF}_6)$  complex after addition of 50% of water to the total volume of the solution. **OH**=  $(\text{PMe}_3)_2\text{Au}_2(\text{OH})$ , **acetonyl**=  $(\text{PMe}_3)_2\text{Au}_2(\text{CH}_2\text{COCH}_3)$ , **acetonyl- $\text{d}_6$** =  $(\text{PMe}_3)_2\text{Au}_2(\text{CD}_2\text{COCD}_3)$ .

KIE:  $(\text{PMe}_3)_2\text{Au}_2(\text{CH}_2\text{COCH}_3)/(\text{PMe}_3)_2\text{Au}_2(\text{CD}_2\text{COCD}_3)$ .



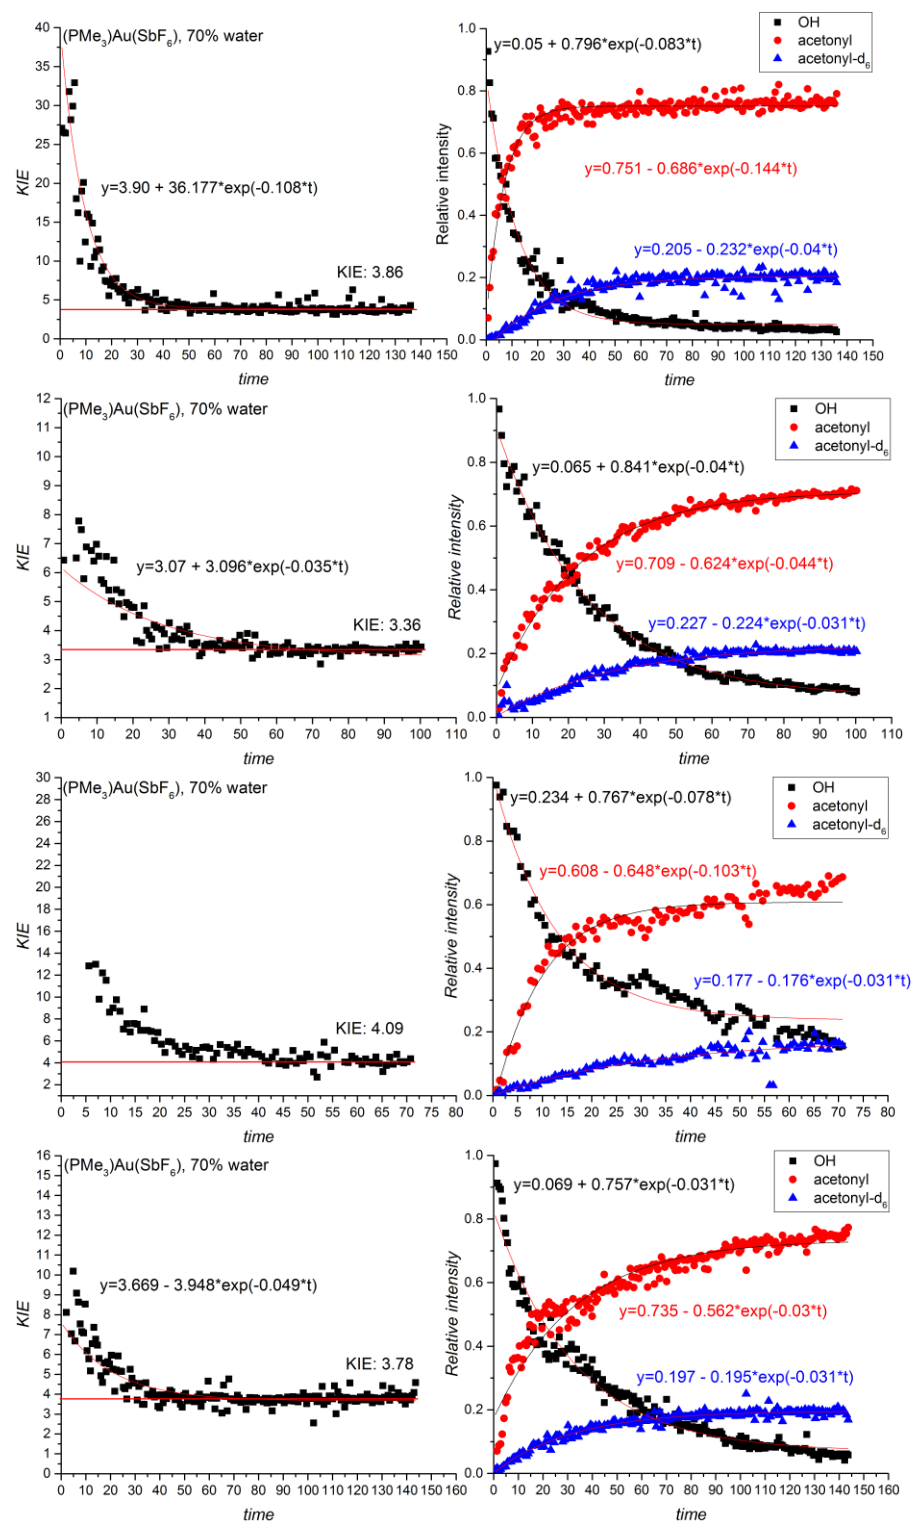

**Figure S11:** KIE as a function of time for the  $(\text{PMe}_3)_2\text{Au}_2(\text{SbF}_6)_2$  complex after addition of 70% of water to the total volume of the solution. **OH**=  $(\text{PMe}_3)_2\text{Au}_2(\text{OH})$ , **acetonyl**=  $(\text{PMe}_3)_2\text{Au}_2(\text{CH}_2\text{COCH}_3)$ , **acetonyl- $\text{d}_6$** =  $(\text{PMe}_3)_2\text{Au}_2(\text{CD}_2\text{COCOD}_3)$ .

KIE:  $(\text{PMe}_3)_2\text{Au}_2(\text{CH}_2\text{COCH}_3)/(\text{PMe}_3)_2\text{Au}_2(\text{CD}_2\text{COCOD}_3)$

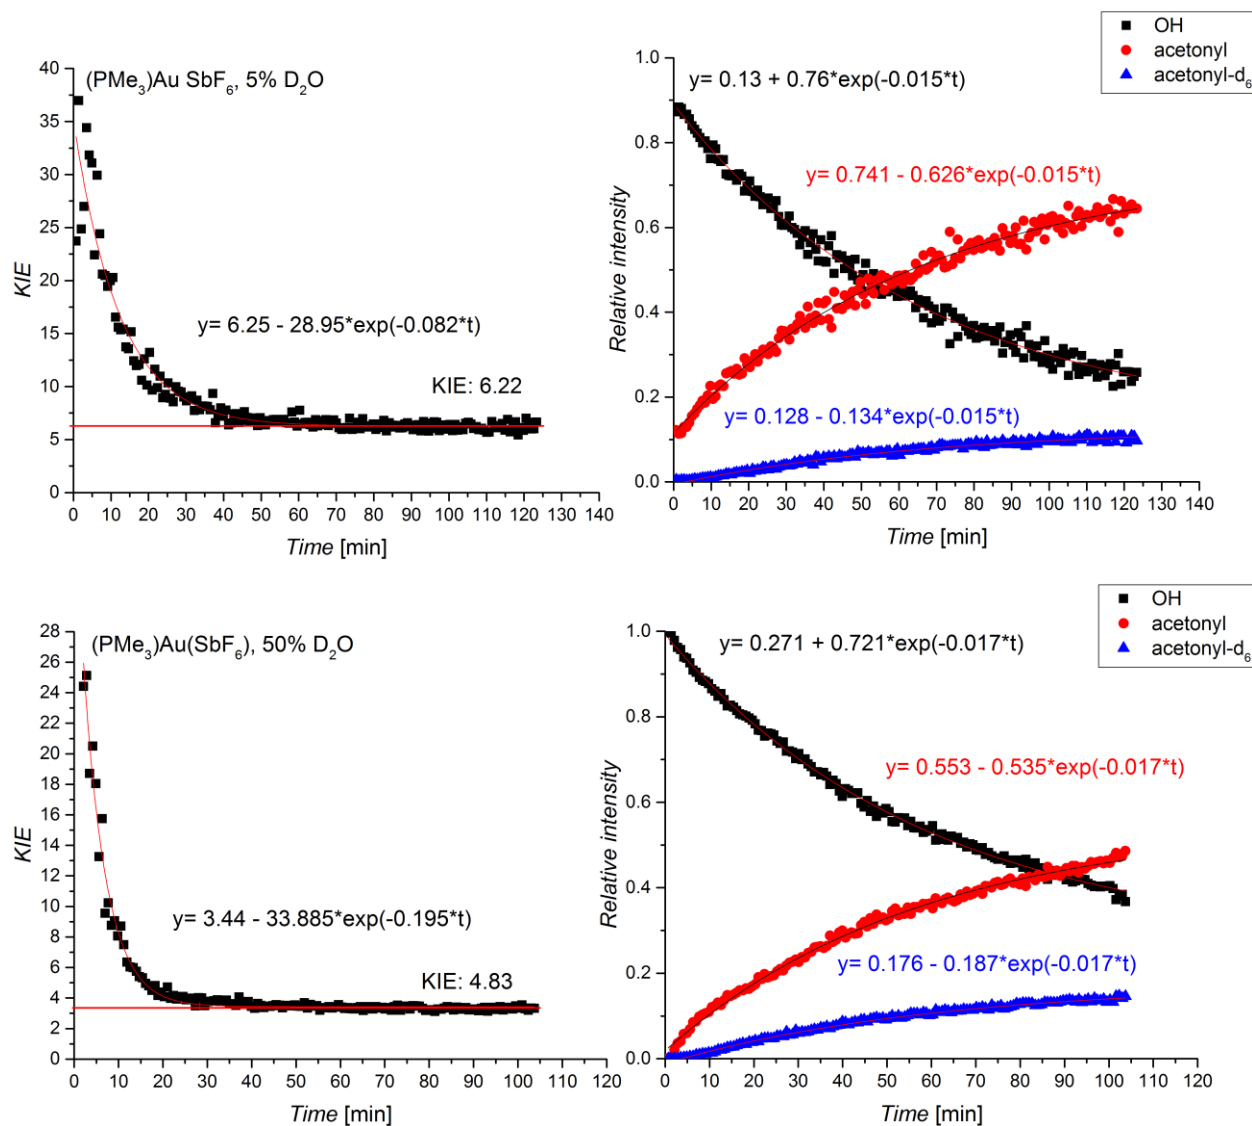

**Figure S12:** KIE as a function of time for the  $(\text{PMe}_3)_3\text{Au}(\text{SbF}_6)$  complex after addition of 5% and 50% of  $\text{D}_2\text{O}$  to the total volume of the solution. **OH** =  $(\text{PMe}_3)_2\text{Au}_2(\text{OH})$ , **acetonyl** =  $(\text{PMe}_3)_2\text{Au}_2(\text{CH}_2\text{COCH}_3)$ , **acetonyl- $\text{d}_6$**  =  $(\text{PMe}_3)_2\text{Au}_2(\text{CD}_2\text{COCD}_3)$ .

KIE:  $(\text{PMe}_3)_2\text{Au}_2(\text{CH}_2\text{COCH}_3) / (\text{PMe}_3)_2\text{Au}_2(\text{CD}_2\text{COCD}_3)$ .

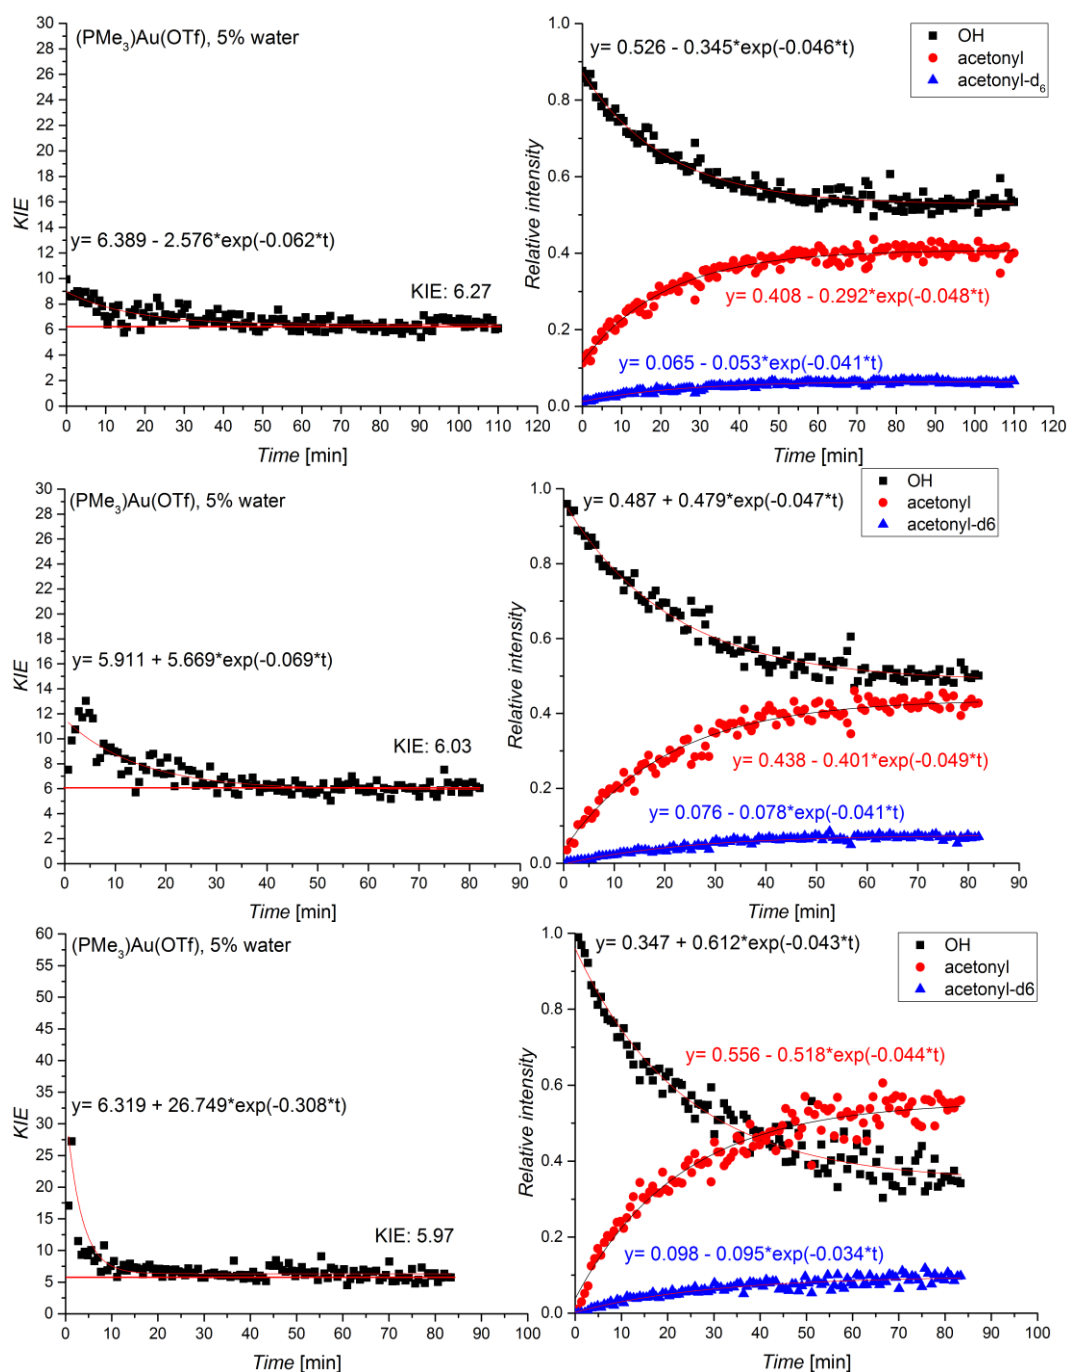

**Figure S13.** Relative intensity of selected ions  $[(\text{PMe}_3)_2\text{Au}_2(\text{CH}_2\text{COCH}_3)]^+$ ,  $[(\text{PMe}_3)_2\text{Au}_2(\text{CD}_2\text{COCD}_3)]^+$  and  $[(\text{PMe}_3)_2\text{Au}_2(\mu\text{-OH})]^+$  as a function of time for the addition of 5% of water to the reaction mixture of the  $(\text{PMe}_3)\text{Au}(\text{OTf})$  complex. The sum of the signal intensities of the labelled and the unlabelled ions and the diaurated hydroxide was normalized to 1.

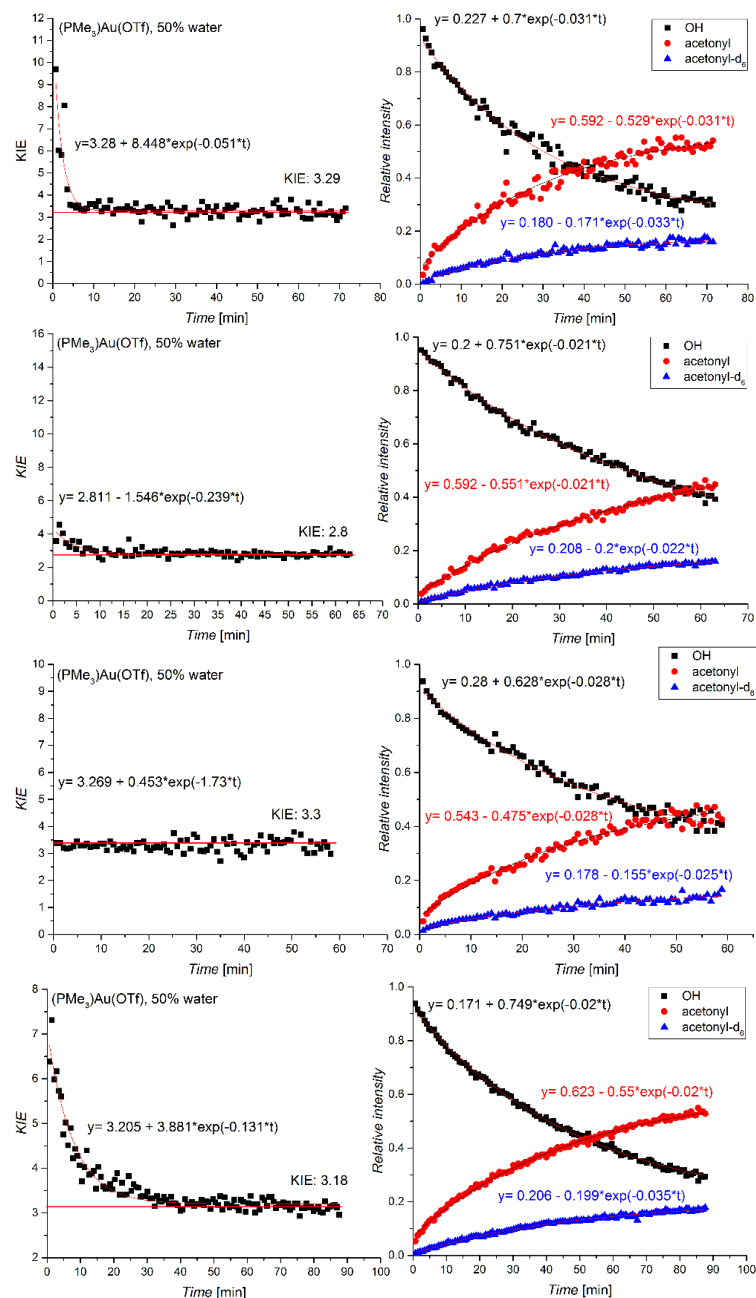

**Figure S14.** Relative intensity of selected ions  $[(\text{PMe}_3)_2\text{Au}_2(\text{CH}_2\text{COCH}_3)]^+$ ,  $[(\text{PMe}_3)_2\text{Au}_2(\text{CD}_2\text{COCD}_3)]^+$  and  $[(\text{PMe}_3)_2\text{Au}_2(\mu\text{-OH})]^+$  as a function of time for the addition of 50% of water to the reaction mixture of the  $(\text{PMe}_3)\text{Au}(\text{OTf})$  complex. The sum of the signal intensities of the labelled and the unlabelled ions and the diaurated hydroxide was normalized to 1.

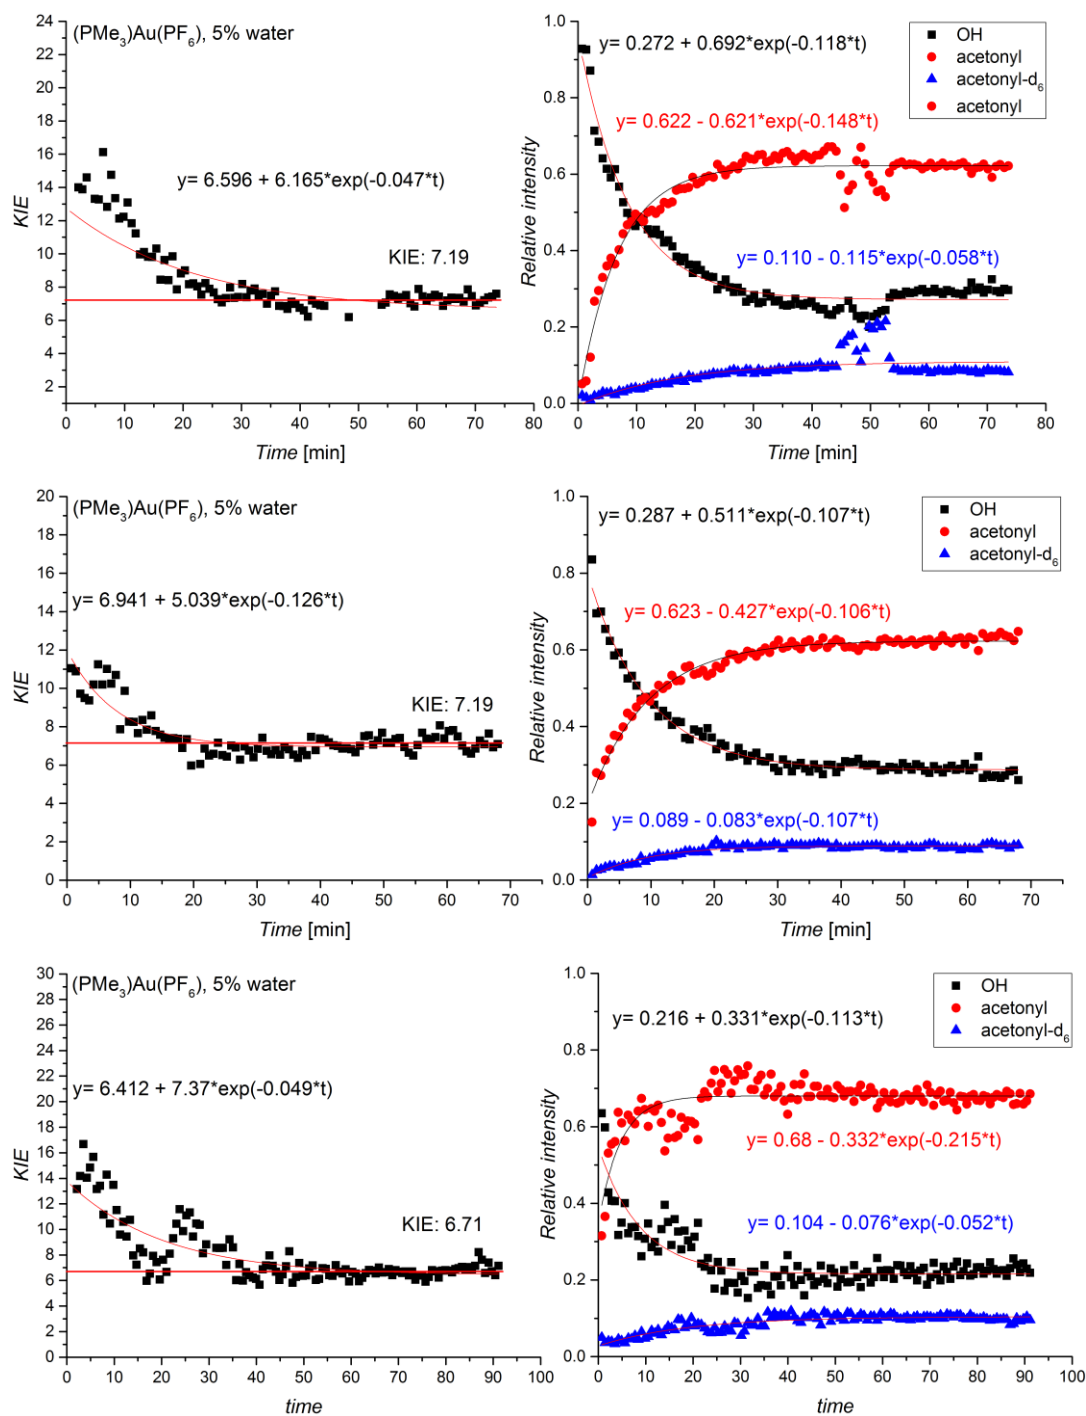

**Figure S15.** Relative intensity of selected ions  $[(\text{PMe}_3)_2\text{Au}_2(\text{CH}_2\text{COCH}_3)]^+$ ,  $[(\text{PMe}_3)_2\text{Au}_2(\text{CD}_2\text{COCD}_3)]^+$  and  $[(\text{PMe}_3)_2\text{Au}_2(\mu\text{-OH})]^+$  as a function of time for the addition of 5% of water to the reaction mixture of the  $(\text{PMe}_3)\text{Au}(\text{PF}_6)$  complex. The sum of the signal intensities of the labelled and the unlabelled ions and the deuterated hydroxide was normalized to 1.

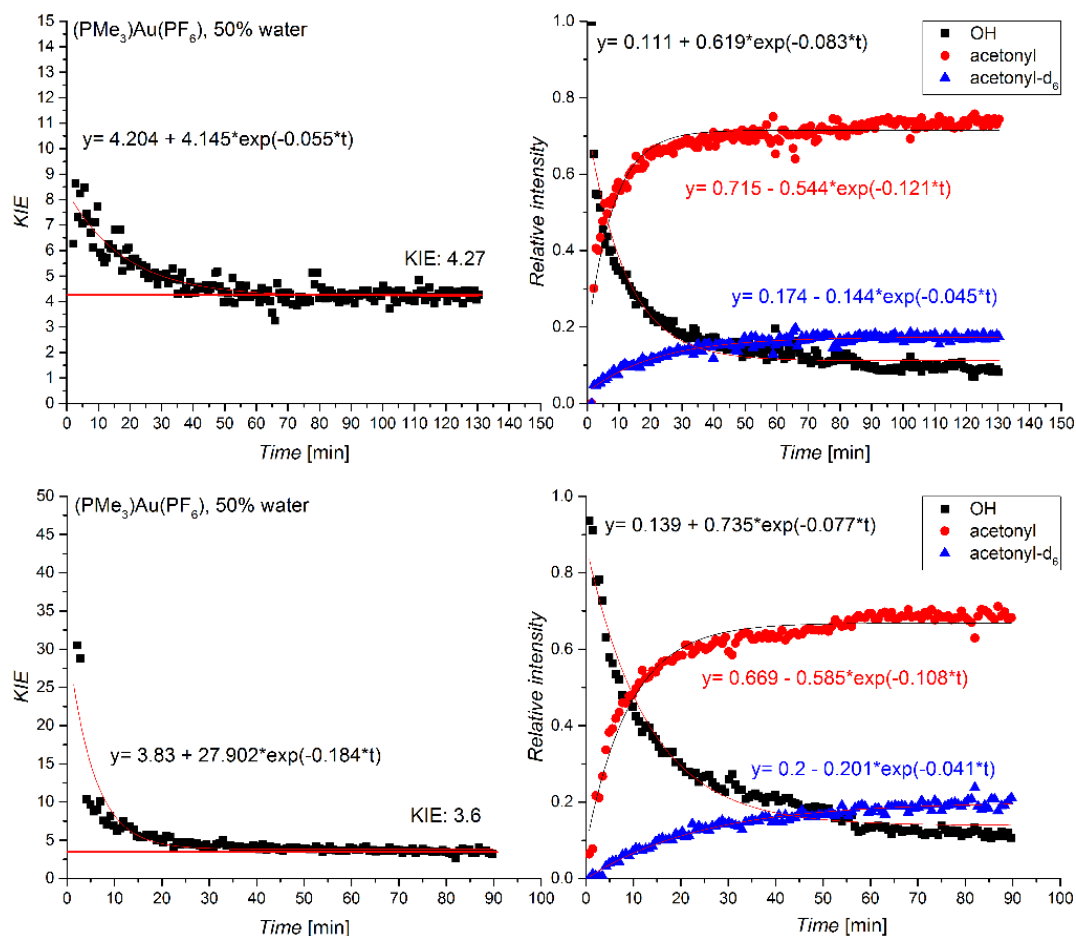

**Figure S16.** Relative intensity of selected ions  $[(\text{PMe}_3)_2\text{Au}_2(\text{CH}_2\text{COCH}_3)]^+$ ,  $[(\text{PMe}_3)_2\text{Au}_2(\text{CD}_2\text{COCD}_3)]^+$  and  $[(\text{PMe}_3)_2\text{Au}_2(\mu\text{-OH})]^+$  as a function of time for the addition of 50% of water to the reaction mixture of the  $(\text{PMe}_3)\text{Au}(\text{PF}_6)$  complex. The sum of the signal intensities of the labelled and the unlabelled ions and the diaurated hydroxide was normalized to 1.

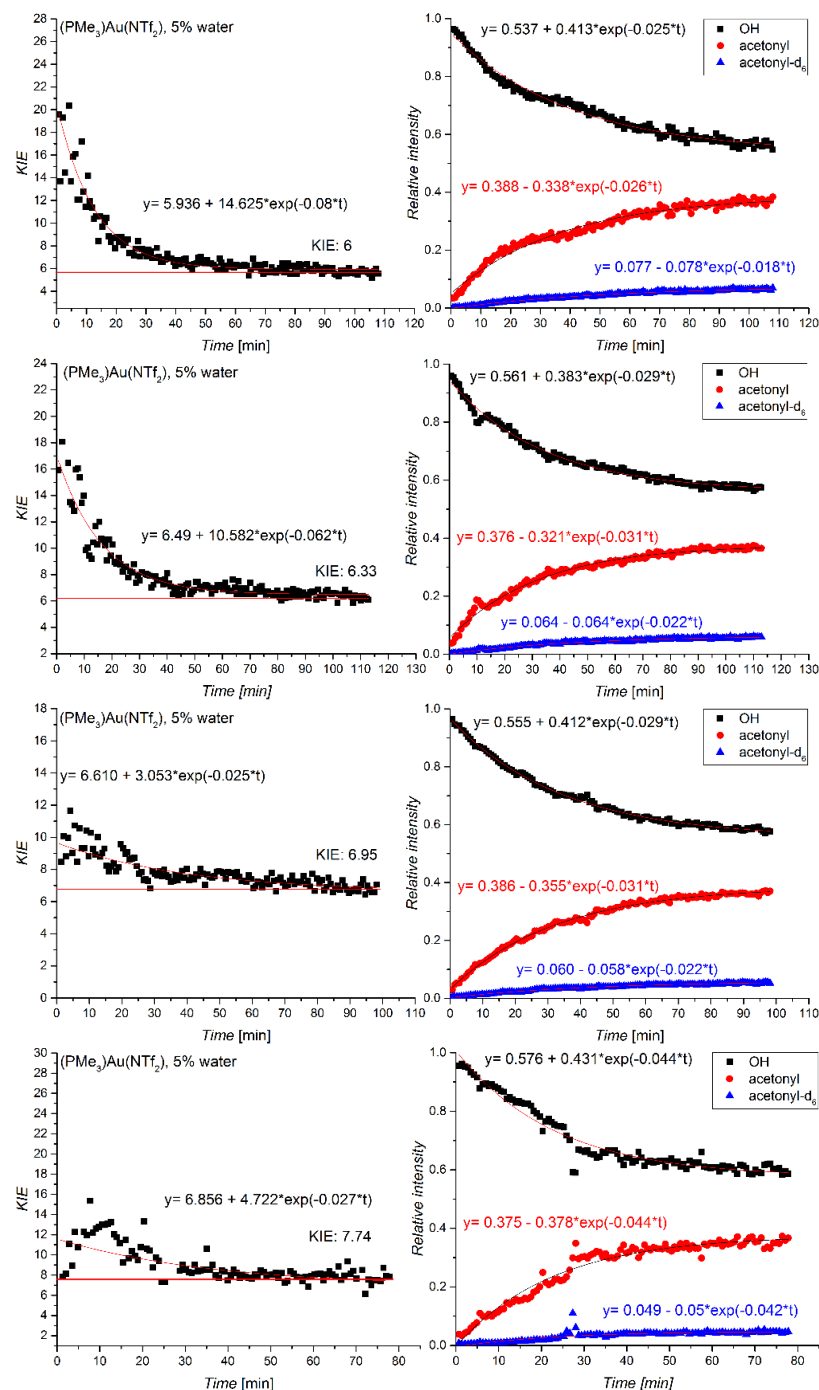

**Figure S17.** Relative intensity of selected ions  $[(\text{PMe}_3)_2\text{Au}_2(\text{CH}_2\text{COCH}_3)]^+$ ,  $[(\text{PMe}_3)_2\text{Au}_2(\text{CD}_2\text{COCd}_3)]^+$  and  $[(\text{PMe}_3)_2\text{Au}_2(\mu\text{-OH})]^+$  as a function of time for the addition of 5% of water to the reaction mixture of the  $(\text{PMe}_3)\text{Au}(\text{NTf}_2)$  complex. The sum of the signal intensities of the labelled and the unlabelled ions and the diaurated hydroxide was normalized to 1.

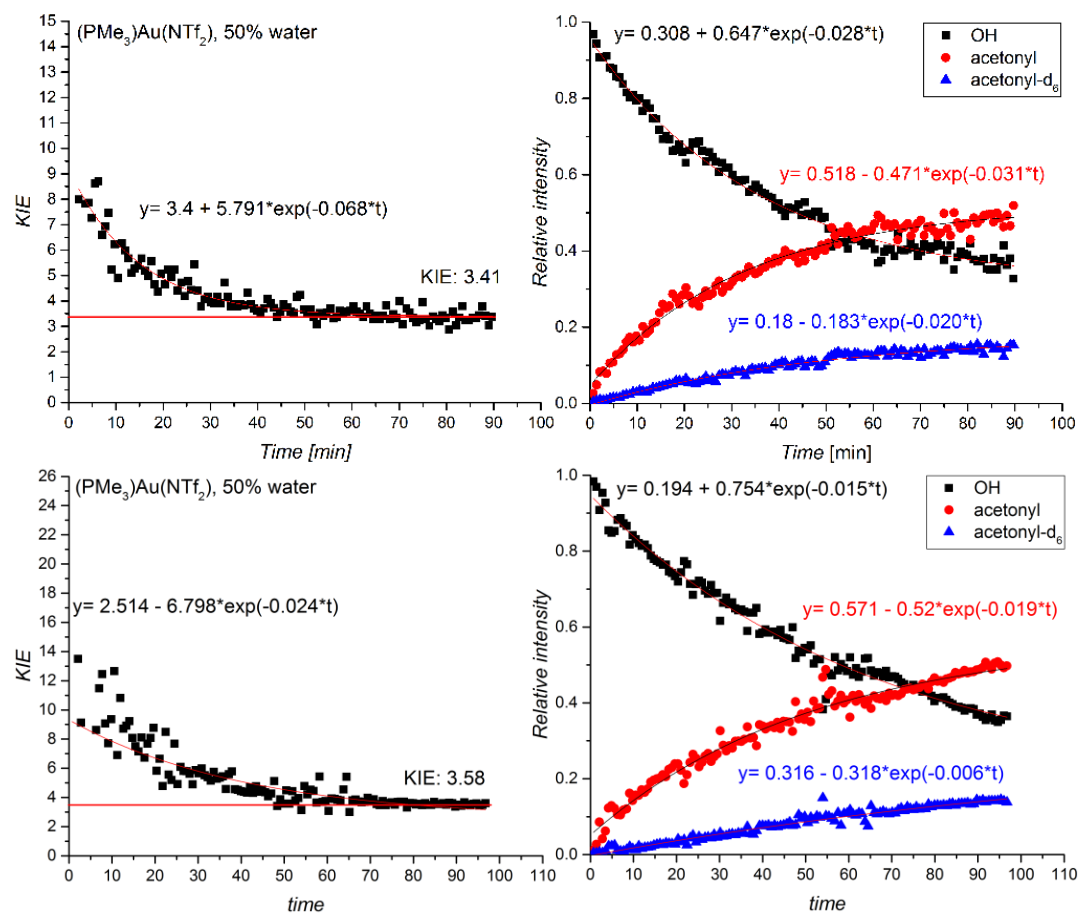

**Figure S18.** Relative intensity of selected ions ( $(\text{PMe}_3)_2\text{Au}_2(\text{CH}_2\text{COCH}_3)$ ,  $(\text{PMe}_3)_2\text{Au}_2(\text{CD}_2\text{COCD}_3)$  and  $(\text{PMe}_3)_2\text{Au}_2(\mu\text{-OH})$ ) as a function of time for the addition of 50% of water to the reaction mixture of the  $(\text{PMe}_3)_2\text{Au}(\text{NTf}_2)$  complex. The sum of the signal intensities of the labelled and the unlabelled ions and the diaurated hydroxide was normalized to 1.



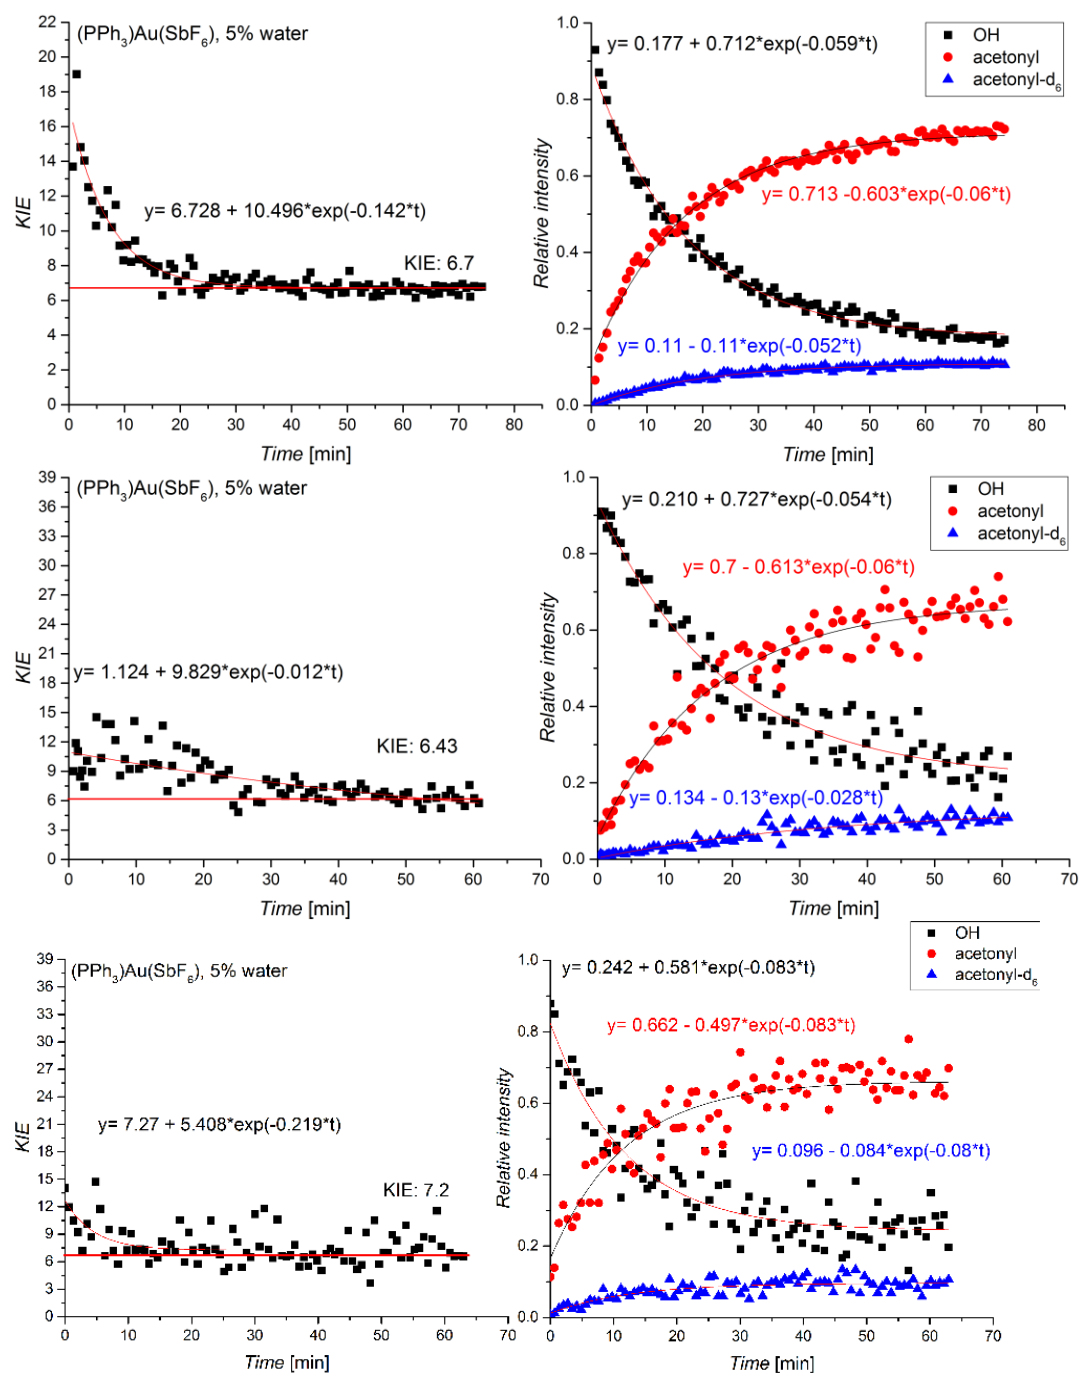

**Figure S19.** Relative intensity of selected ions  $[(\text{PPh}_3)_2\text{Au}_2(\text{CH}_2\text{COCH}_3)]^+$ ,  $[(\text{PPh}_3)_2\text{Au}_2(\text{CD}_2\text{COCD}_3)]^+$  and  $[(\text{PPh}_3)_2\text{Au}_2(\mu\text{-OH})]^+$  as a function of time for the addition of 5% of water to the reaction mixture of the  $(\text{PPh}_3)\text{Au}(\text{SbF}_6)$  complex. The sum of the signal intensities of the labelled and the unlabelled ions and the diaurated hydroxide was normalized to 1.

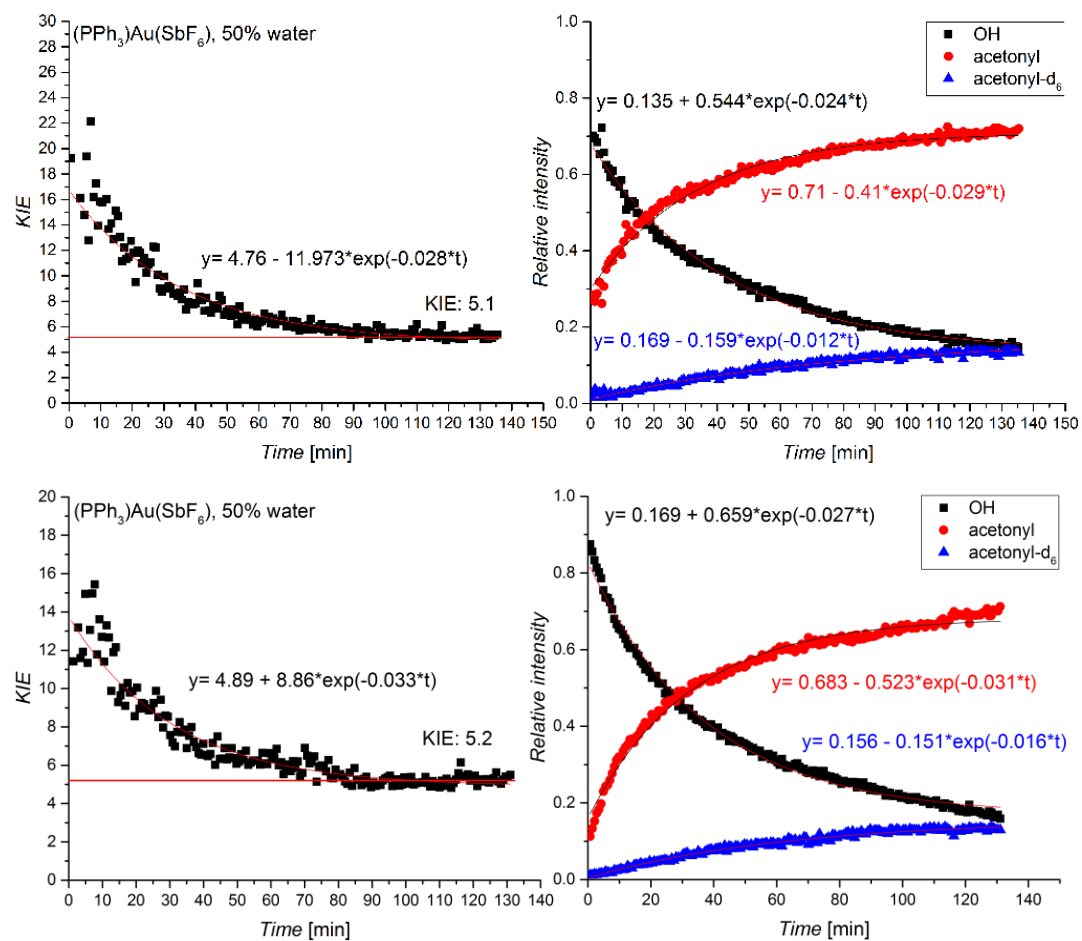

**Figure S20.** Relative intensity of selected ions  $[(\text{PPh}_3)_2\text{Au}_2(\text{CH}_2\text{COCH}_3)]^+$ ,  $[(\text{PPh}_3)_2\text{Au}_2(\text{CD}_2\text{COCD}_3)]^+$  and  $[(\text{PPh}_3)_2\text{Au}_2(\mu\text{-OH})]^+$  as a function of time for the addition of 50% of water to the reaction mixture of the  $(\text{PPh}_3)_2\text{Au}(\text{SbF}_6)$  complex. The sum of the signal intensities of the labelled and the unlabelled ions and the diaurated hydroxide was normalized to 1.

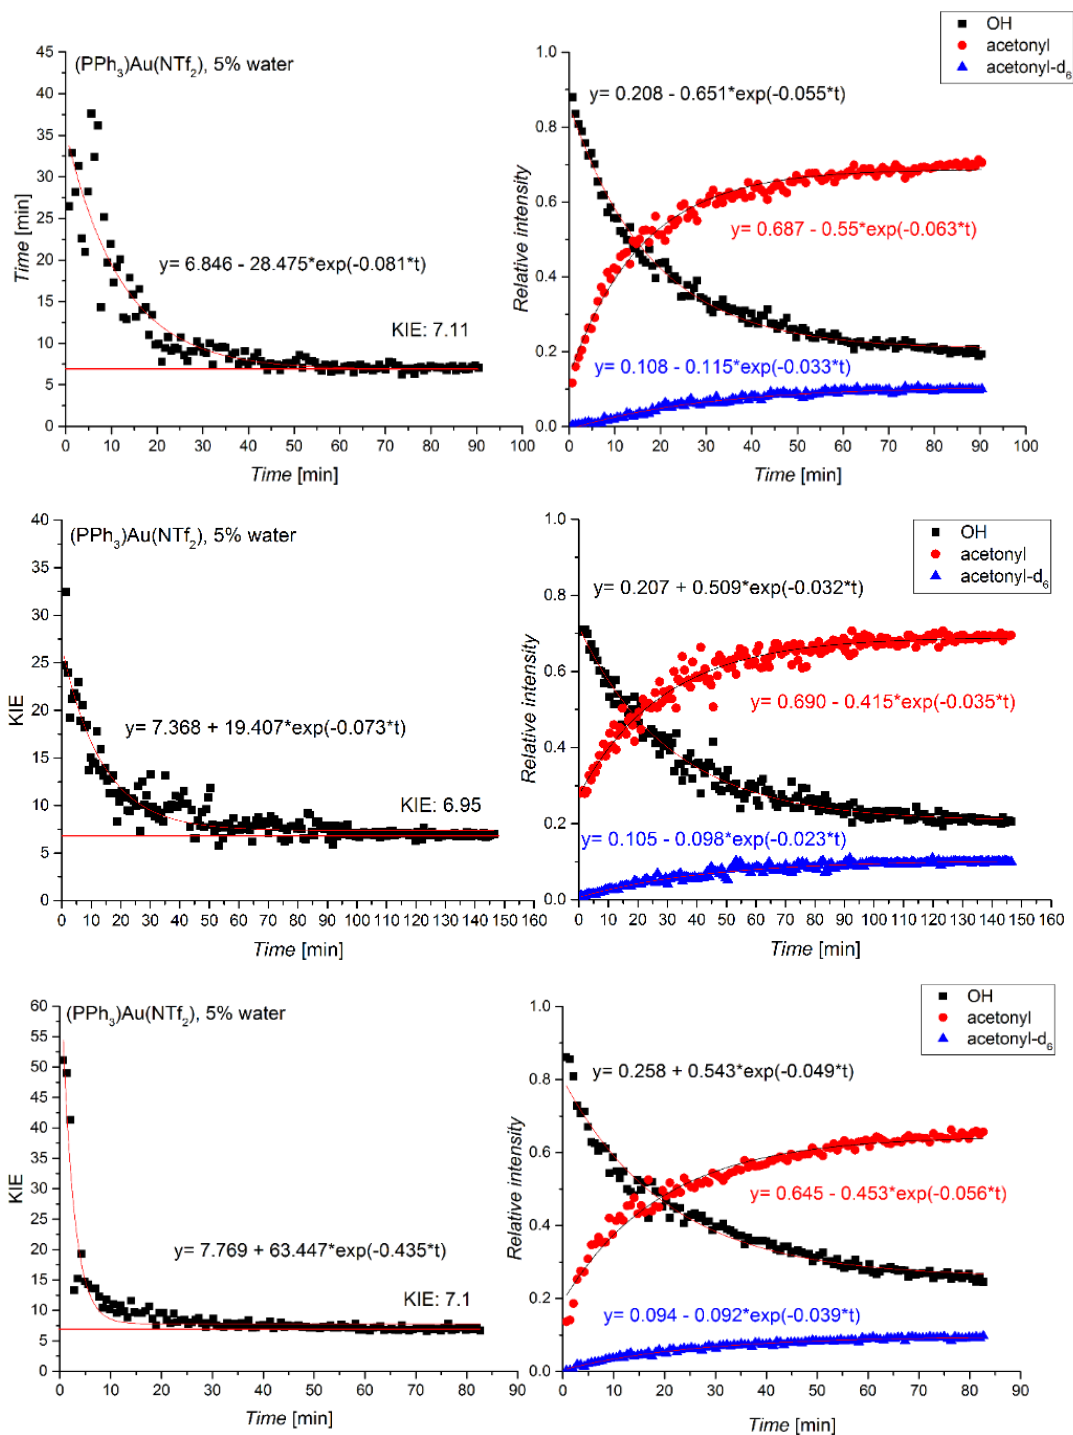

**Figure S21.** Relative intensity of selected ions  $[(\text{PPh}_3)_2\text{Au}_2(\text{CH}_2\text{COCH}_3)]^+$ ,  $[(\text{PPh}_3)_2\text{Au}_2(\text{CD}_2\text{COCD}_3)]^+$  and  $[(\text{PPh}_3)_2\text{Au}_2(\mu\text{-OH})]^+$  as a function of time for the addition of 5% of water to the reaction mixture of the  $(\text{PPh}_3)\text{Au}(\text{NTf}_2)$  complex. The sum of the signal intensities of the labelled and the unlabelled ions and the diaurated hydroxide was normalized to 1.

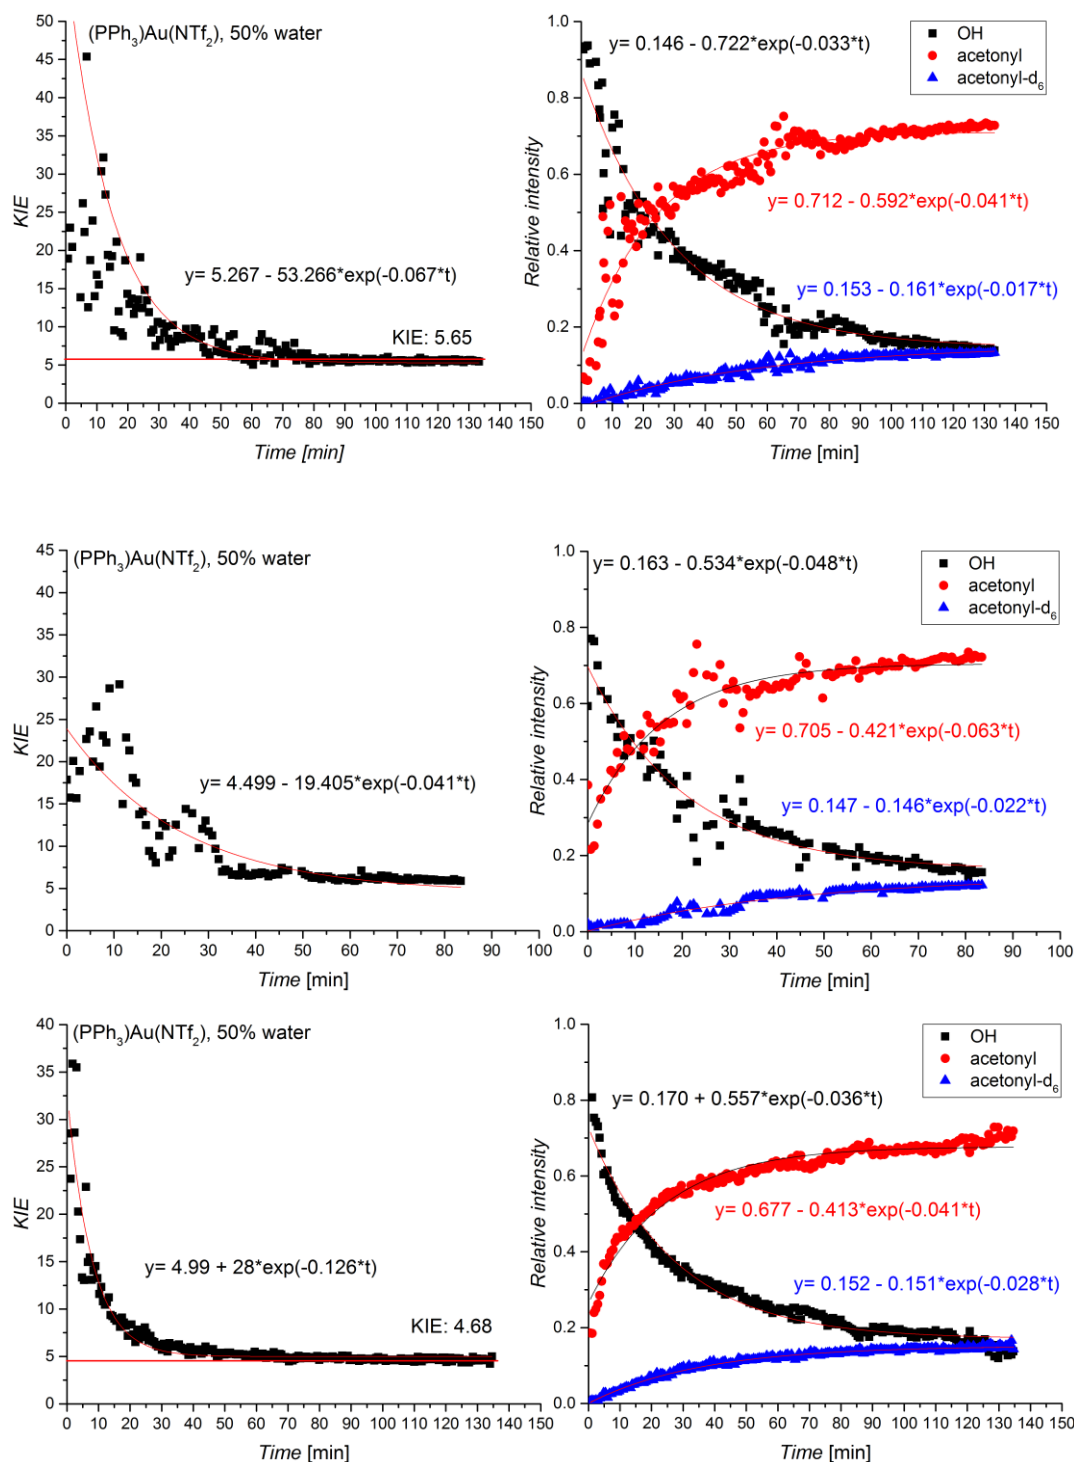

**Figure S22.** Relative intensity of selected ions  $[(\text{PPh}_3)_2\text{Au}_2(\text{CH}_2\text{COCH}_3)]^+$ ,  $[(\text{PPh}_3)_2\text{Au}_2(\text{CD}_2\text{COCD}_3)]^+$  and  $[(\text{PPh}_3)_2\text{Au}_2(\mu\text{-OH})]^+$  as a function of time for the addition of 50% of water to the reaction mixture of the  $(\text{PPh}_3)\text{Au}(\text{NTf}_2)$  complex. The sum of the signal intensities of the labelled and the unlabelled ions and the diaurated hydroxide was normalized to 1.

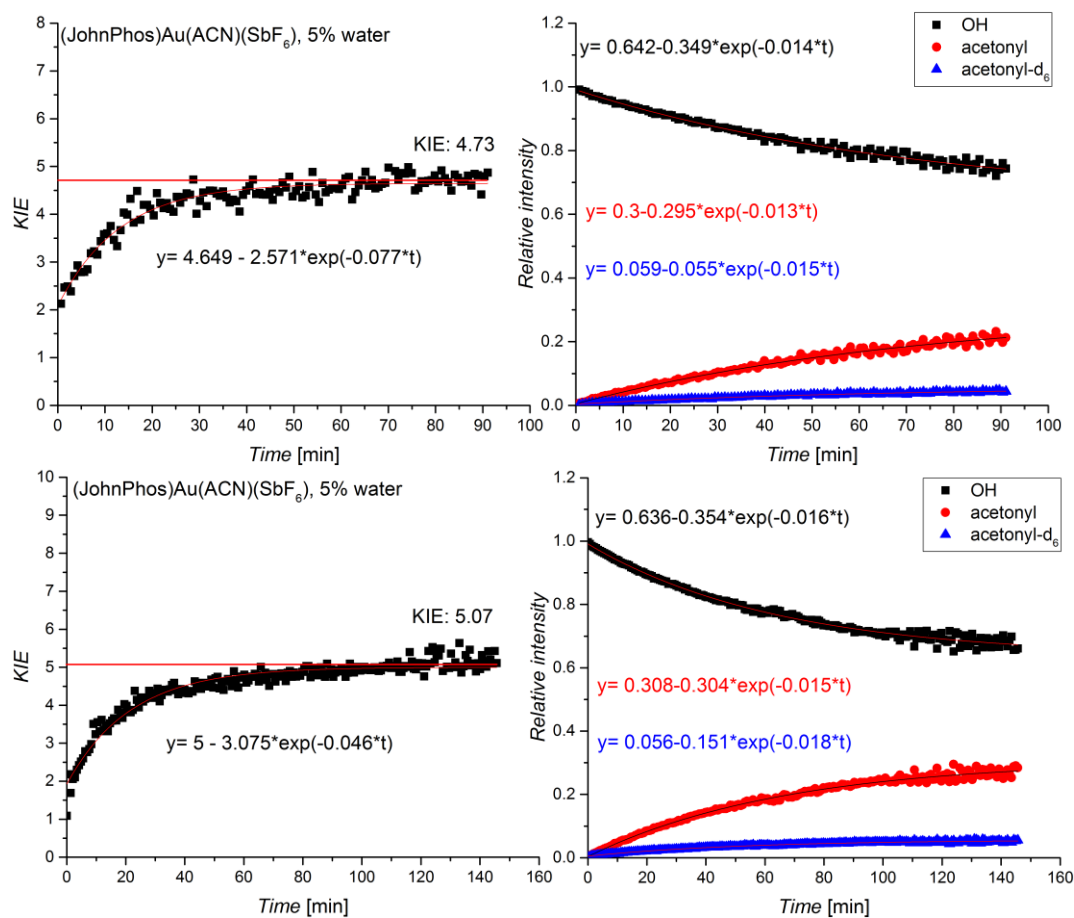

**Figure S23.** Relative intensity of selected ions [(JohnPhos)<sub>2</sub>Au<sub>2</sub>(CH<sub>2</sub>COCH<sub>3</sub>)]<sup>+</sup>, [(JohnPhos)<sub>2</sub>Au<sub>2</sub>(CD<sub>2</sub>COCD<sub>3</sub>)]<sup>+</sup> and [(JohnPhos)<sub>2</sub>Au<sub>2</sub>(μ-OH)]<sup>+</sup> as a function of time for the addition of 5% of water to the reaction mixture of the (JohnPhos)Au(ACN)(SbF<sub>6</sub>) complex. The sum of the signal intensities of the labelled and the unlabelled ions and the diaurated hydroxide was normalized to 1.

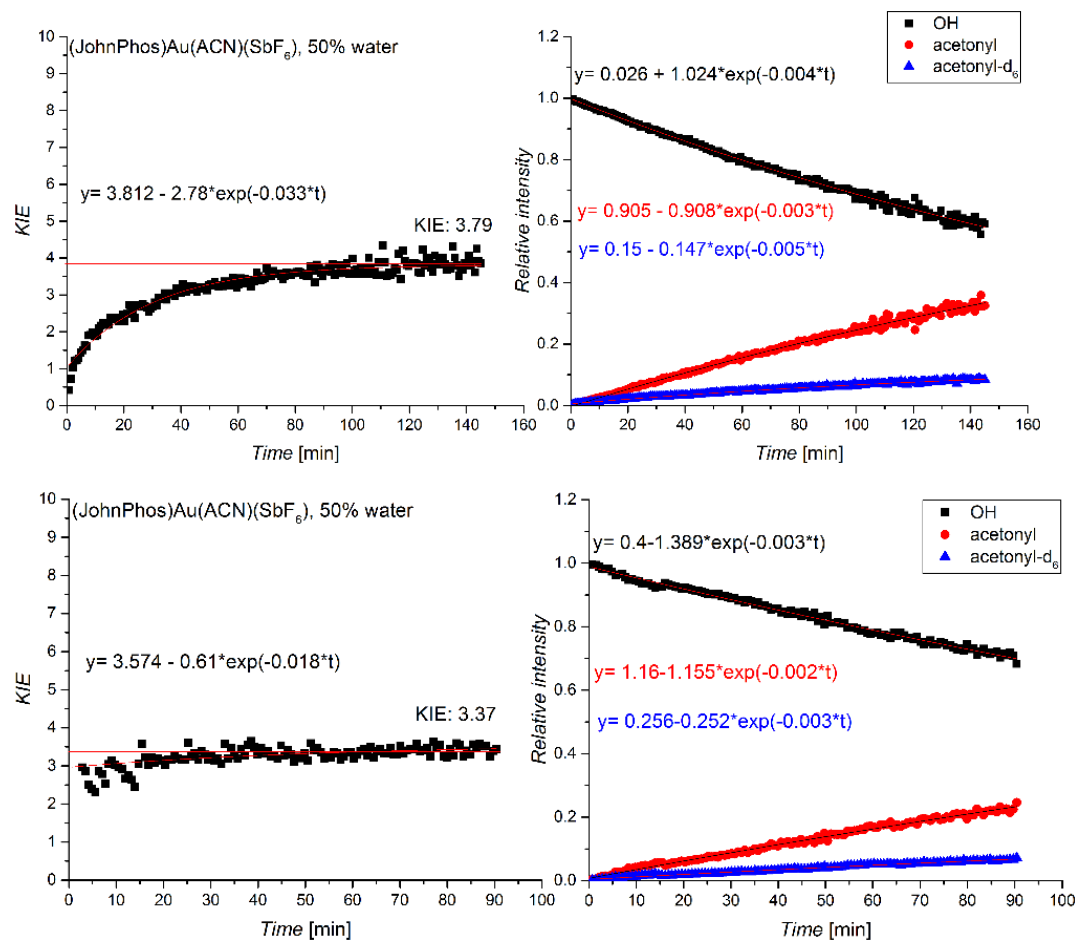

**Figure S24.** Relative intensity of selected ions [(JohnPhos)<sub>2</sub>Au<sub>2</sub>(CH<sub>2</sub>COCH<sub>3</sub>)<sup>+</sup>], [(JohnPhos)<sub>2</sub>Au<sub>2</sub>(CD<sub>2</sub>COCD<sub>3</sub>)<sup>+</sup>] and [(JohnPhos)<sub>2</sub>Au<sub>2</sub>(μ-OH)]<sup>+</sup> as a function of time for the addition of 50% of water to the reaction mixture of the (JohnPhos)Au(ACN)(SbF<sub>6</sub>) complex. The sum of the signal intensities of the labelled and the unlabelled ions and the deuterated hydroxide was normalized to 1.

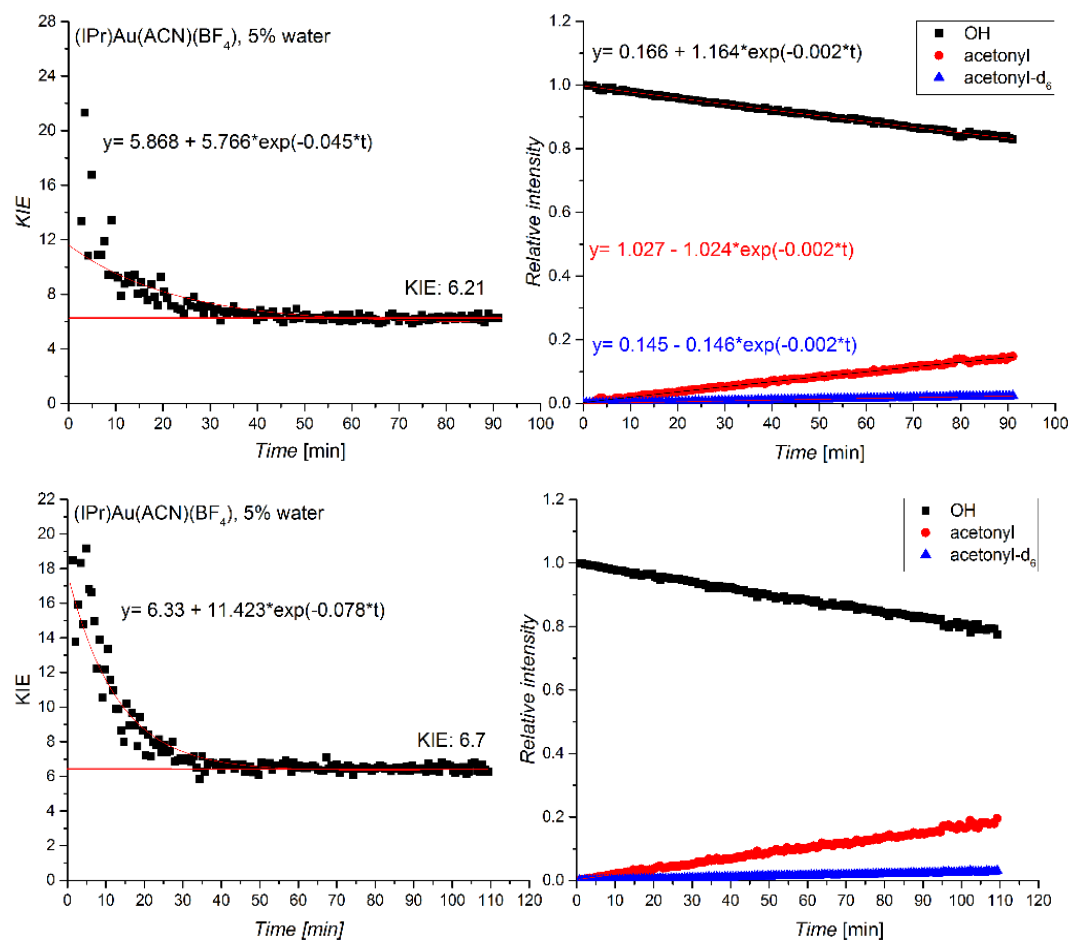

**Figure S25.** Relative intensity of selected ions [(IPr)<sub>2</sub>Au<sub>2</sub>(CH<sub>2</sub>COCH<sub>3</sub>)]<sup>+</sup>, [(IPr)<sub>2</sub>Au<sub>2</sub>(CD<sub>2</sub>COCD<sub>3</sub>)]<sup>+</sup> and [(IPr)<sub>2</sub>Au<sub>2</sub>(μ-OH)]<sup>+</sup> as a function of time for the addition of 5% of water to the reaction mixture of the (IPr)Au(ACN)(BF<sub>4</sub>) complex. The sum of the signal intensities of the labelled and the unlabelled ions and the diaurated hydroxide was normalized to 1.

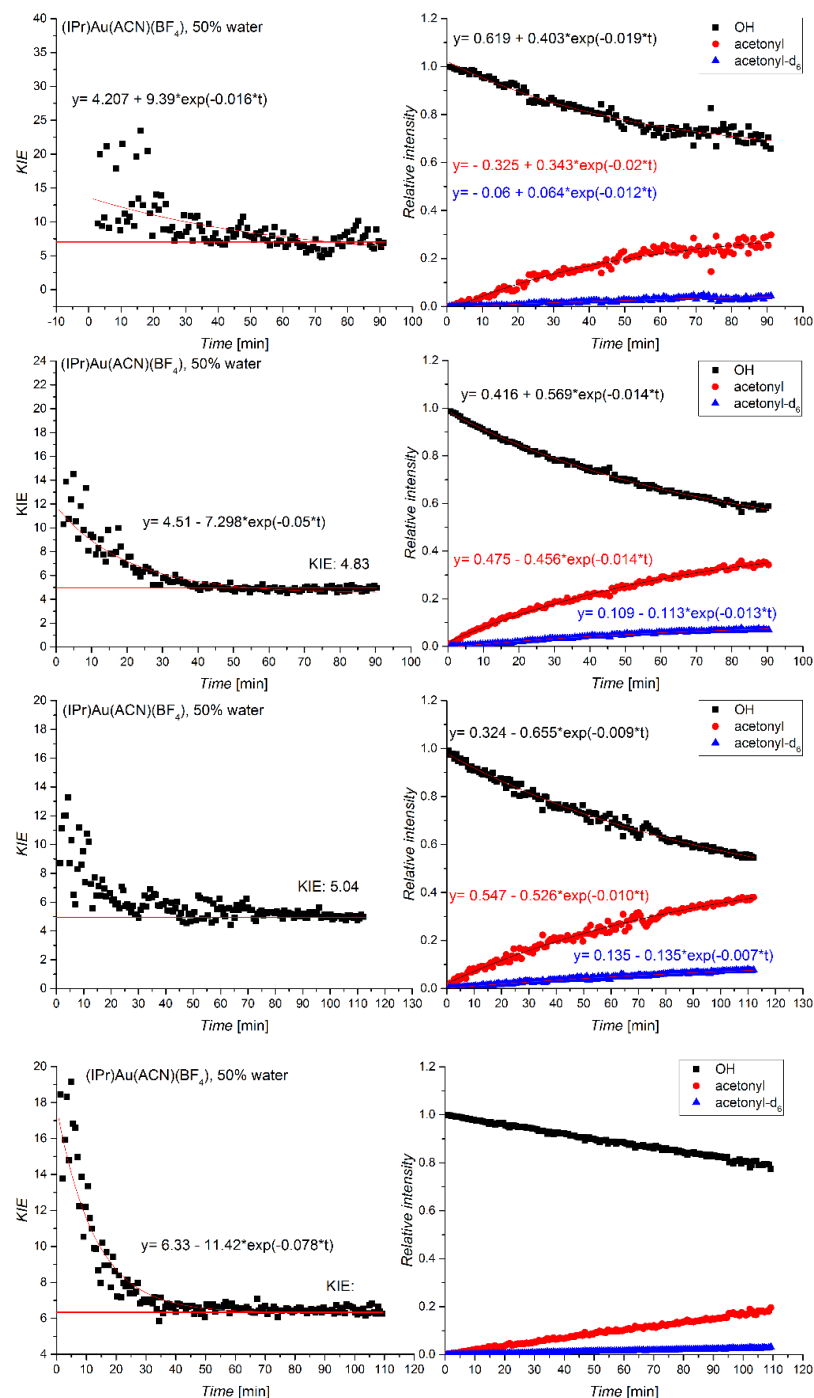

**Figure S26.** Relative intensity of selected ions [(IPr)<sub>2</sub>Au<sub>2</sub>(CH<sub>2</sub>COCH<sub>3</sub>)<sup>+</sup>, [(IPr)<sub>2</sub>Au<sub>2</sub>(CD<sub>2</sub>COCD<sub>3</sub>)<sup>+</sup> and [(IPr)<sub>2</sub>Au<sub>2</sub>(μ-OH)]<sup>+</sup> as a function of time for the addition of 50% of water to the reaction mixture of the (IPr)Au(ACN)(BF<sub>4</sub>) complex. The sum of the signal intensities of the labelled and the unlabelled ions and the deuterated hydroxide was normalized to 1.



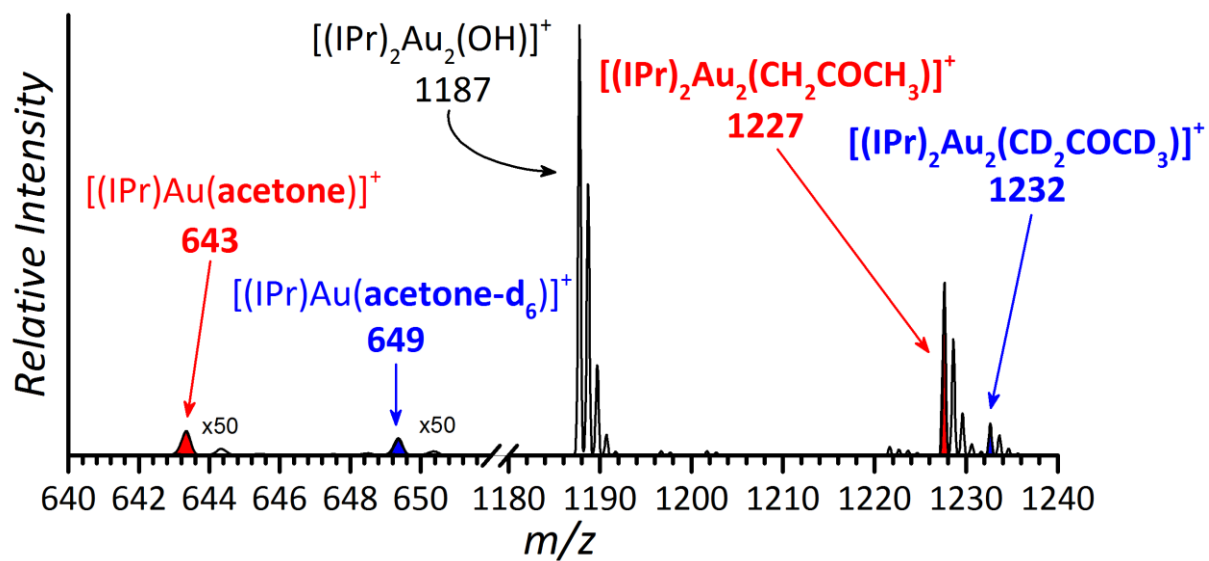

**Figure S27.** The ESI-MS source spectrum of the  $[(IPr)_2Au_2(OH)BF_4]$  (637  $\mu$ g) complex in dry dioxane (0.2 ml), dry acetone (0.7 ml) and dry acetone- $d_6$  (0.7 ml).

## Formation of gold acetonil complexes in time

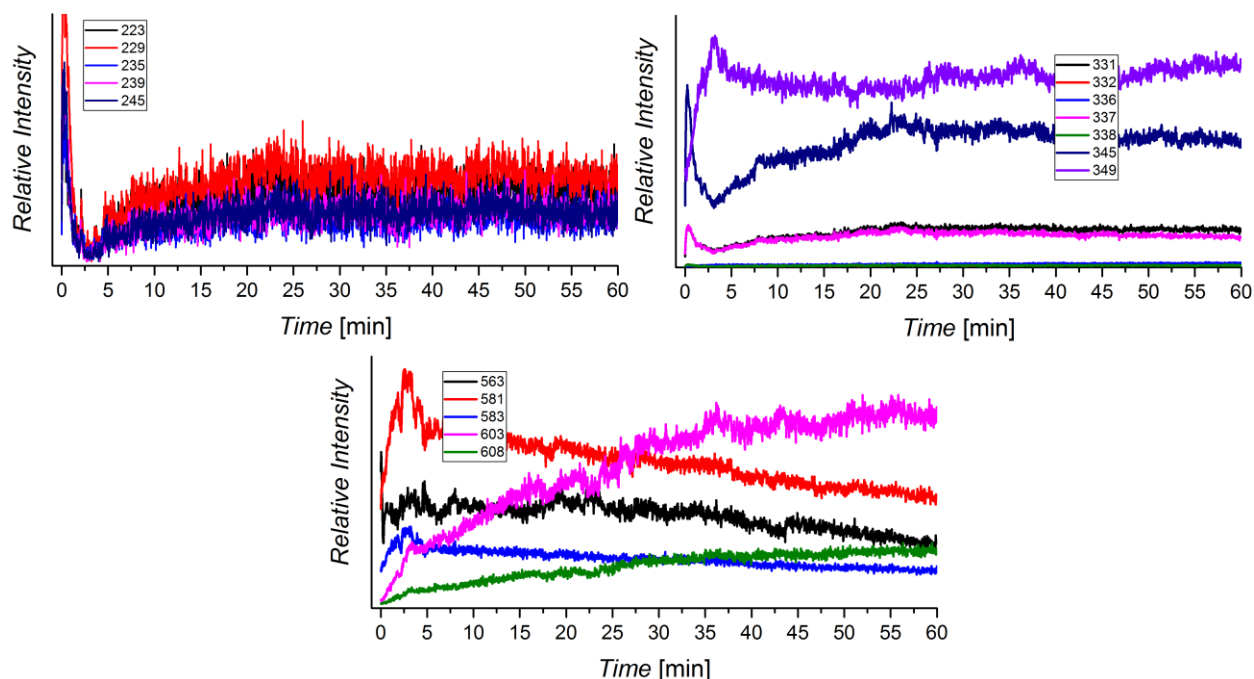

**Figure S28.** Experiment:  $[(\text{PMe}_3)\text{AuSbF}_6]$  (77  $\mu\text{g}$ ) was dissolved in THF (0.8 ml) and of  $\text{H}_2\text{O}$  (0.56 ml) and left to react overnight. Then, 0.8 ml of a 1:1 solution of  $\text{CH}_3\text{COCH}_3$  and  $\text{CD}_3\text{COCD}_3$  was added to the solution, and the solution was immediately monitored by ESI-MS. The sum of the signal intensities of the ions was normalized to TIC.

$[(^{107}\text{Ag}(\text{CH}_3\text{COCH}_3)_2)^+ (m/z\ 223), [^{107}\text{Ag}(\text{CH}_3\text{COCH}_3)(\text{CD}_3\text{COCD}_3)]^+ (m/z\ 229), [^{107}\text{Ag}(\text{CD}_3\text{COCD}_3)_2]^+ (m/z\ 235), [^{107}\text{Ag}(\text{CH}_3\text{COCH}_3)(\text{THF})]^+ (m/z\ 239), [^{109}\text{Ag}(\text{CD}_3\text{COCD}_3)(\text{THF})]^+ (m/z\ 245), [(\text{PMe}_3)\text{Au}(\text{CH}_3\text{COCH}_3)]^+ (m/z\ 331), [(\text{PMe}_3)\text{Au}(\text{CH}_2\text{COCH}_3)]^+ (m/z\ 332), [(\text{PMe}_3)\text{Au}(\text{CD}_2\text{COCD}_3)]^+ (m/z\ 336), [(\text{PMe}_3)\text{Au}(\text{CD}_3\text{COCD}_3)]^+ (m/z\ 337), [(\text{PMe}_3)\text{Au}(\text{CD}_2\text{COCD}_3)]^+ (m/z\ 338), [(\text{PMe}_3)\text{Au}(\text{THF})]^+ (m/z\ 345), [(\text{PMe}_3)_2\text{Au}]^+ (m/z\ 349), [(\text{PMe}_3)_2\text{Au}_2(\text{OH})]^+ (m/z\ 563), [(\text{PMe}_3)_2\text{Au}_2(\text{Cl})]^+ (m/z\ 581), [(\text{PMe}_3)_2\text{Au}_2(^{37}\text{Cl})]^+ (m/z\ 583), [(\text{PMe}_3)_2\text{Au}_2(\text{CH}_2\text{COCH}_3)]^+ (m/z\ 603), [(\text{PMe}_3)_2\text{Au}_2(\text{CD}_2\text{COCD}_3)]^+ (m/z\ 608).$

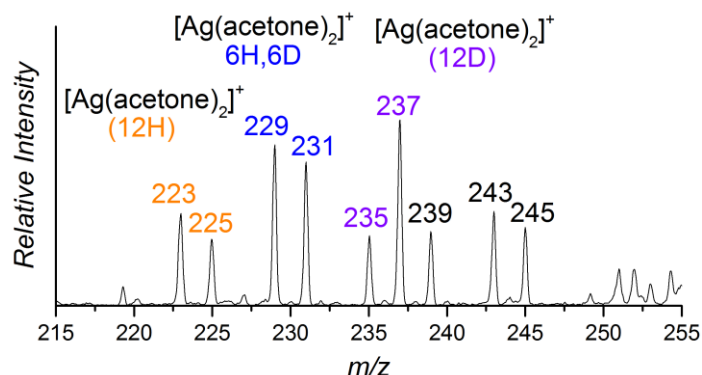

**Figure S29.** ESI-MS spectrum of the experiment, in which  $[(\text{PMe}_3)\text{AuSbF}_6]$  (77  $\mu\text{g}$ ) was dissolved in THF (0.8 ml) and  $\text{H}_2\text{O}$  (0.56 ml) and left to react for 15 hours. Then, a 1:1 mixture of  $\text{CH}_3\text{COCH}_3$  and  $\text{CD}_3\text{COCD}_3$  (0.8 ml) was added and the solution was immediately monitored by ESI-MS.

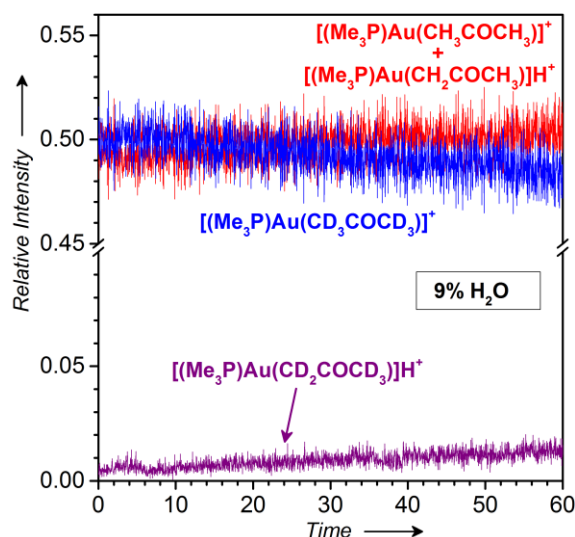

**Figure S30.** Results of the experiment, in which  $[(\text{PMe}_3)\text{AuSbF}_6]$  (77  $\mu\text{g}$ ) was dissolved in THF (0.8 ml), of  $\text{H}_2\text{O}$  0.08 ml (9% v/v) and left to react for 15 hours. Then, a 1:1 mixture of  $\text{CH}_3\text{COCH}_3$  and  $\text{CD}_3\text{COCD}_3$  (0.8 ml) was added and the solution was immediately monitored by ESI-MS. The figure shows the time evolution of the relative concentration of  $[(\text{PMe}_3)\text{Au}(\text{CD}_3\text{COCD}_3)]^+$  ( $m/z$  337) with respect to the sum of both gold acetone complexes  $[(\text{PMe}_3)\text{Au}(\text{CH}_3\text{COCH}_3)]^+$  and  $[(\text{PMe}_3)\text{Au}(\text{CD}_2\text{COCD}_3)]\text{D}^+$ . The purple lines show the evolution of the  $[(\text{PMe}_3)\text{Au}(\text{CD}_2\text{COCD}_3)]\text{H}^+$  species ( $m/z$  337).

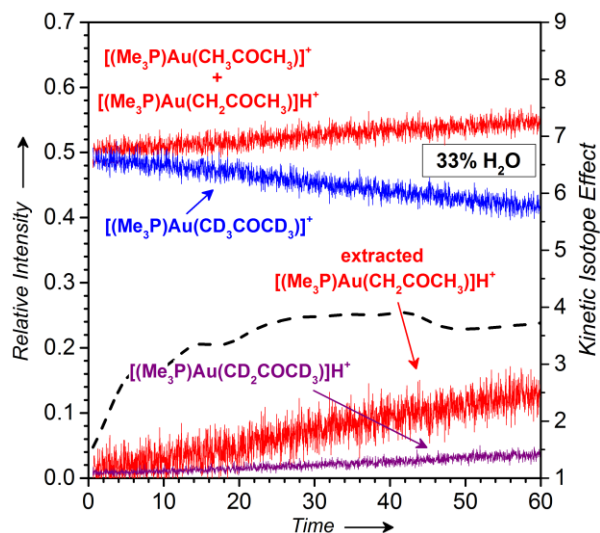

**Figure S31.** Results of the experiment, in which  $[(\text{PMe}_3)\text{AuSbF}_6]$  (77  $\mu\text{g}$ ) was dissolved in THF (0.8 ml), 0.4 ml of  $\text{H}_2\text{O}$  (33% v/v) and left to react for 15 hours. Then, a 1:1 mixture of  $\text{CH}_3\text{COCH}_3$  and  $\text{CD}_3\text{COCD}_3$  (0.8 ml) was added and the solution was immediately monitored by ESI-MS. The figure shows the time evolution of the relative concentration of  $[(\text{PMe}_3)\text{Au}(\text{CD}_3\text{COCD}_3)]^+$  ( $m/z$  337) with respect to the sum of both gold acetone complexes  $[(\text{PMe}_3)\text{Au}(\text{CH}_3\text{COCH}_3)]^+$  and  $[(\text{PMe}_3)\text{Au}(\text{CD}_2\text{COCD}_3)]\text{D}^+$ . The purple lines show the evolution of the  $[(\text{PMe}_3)\text{Au}(\text{CD}_2\text{COCD}_3)]\text{H}^+$  species ( $m/z$  337).

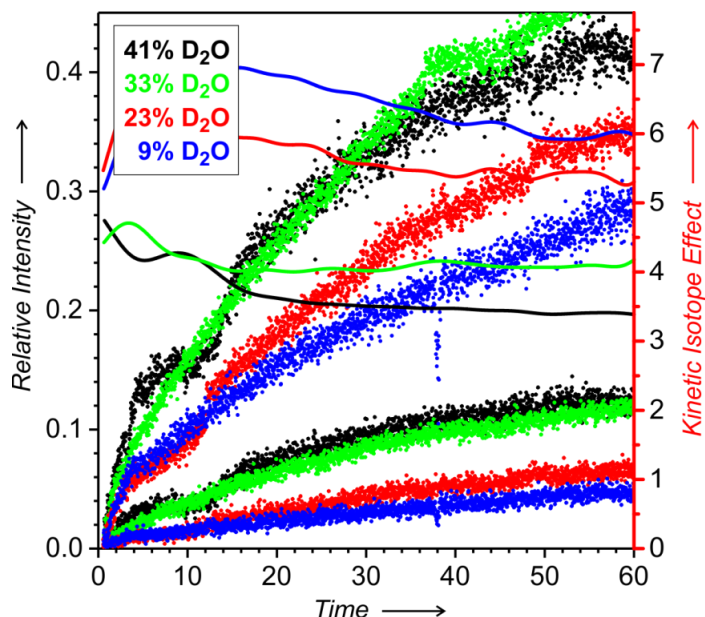

**Figure S32.** Time evolution of the relative concentrations  $[(\text{PMe}_3)_2\text{Au}_2(\text{CH}_2\text{COCH}_3)]^+$  ( $m/z$  603, the upper curves) and  $[(\text{PMe}_3)_2\text{Au}_2(\text{CD}_2\text{COCD}_3)]^+$  ( $m/z$  608, the lower curves) with respect to the sum of all diaurated complexes ( $[(\text{PMe}_3)_2\text{Au}_2\text{OH}]^+$ ,  $[(\text{PMe}_3)_2\text{Au}_2\text{Cl}]^+$ ,  $[(\text{PMe}_3)_2\text{Au}_2(\text{CH}_2\text{COCH}_3)]^+$  and  $[(\text{PMe}_3)_2\text{Au}_2(\text{CD}_2\text{COCD}_3)]^+$ ) in solution with  $\text{D}_2\text{O}$ . The right-hand axis refers to the kinetic isotope effect for the formation of digold acetonyls and the smoothed out ratio of  $[(\text{PMe}_3)_2\text{Au}_2(\text{CH}_2\text{COCH}_3)]^+$  and  $[(\text{PMe}_3)_2\text{Au}_2(\text{CD}_2\text{COCD}_3)]^+$  is shown as lines. Experiment:  $[(\text{PMe}_3)\text{AuSbF}_6]$  (77  $\mu\text{g}$ ) was dissolved in THF (0.8 ml) and  $\text{D}_2\text{O}$  (80 – 9 % v/v in blue, 240 – 23% v/v in red, 400 – 33% v/v in green, and 560 – 41% v/v in black  $\mu\text{L}$  and left to react for 15 hours. Then, a 1:1 mixture of  $\text{CH}_3\text{COCH}_3$  and  $\text{CD}_3\text{COCD}_3$  (0.8 ml) was added and the solution was immediately monitored by ESI-MS.

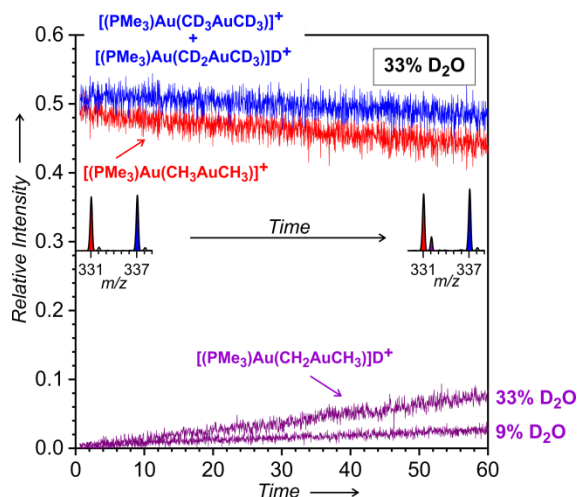

**Figure S33:** Results of the experiment, in which  $[(\text{PMe}_3)\text{AuSbF}_6]$  (77  $\mu\text{g}$ ) was dissolved in THF (0.8 ml), 0.56 ml of  $\text{D}_2\text{O}$  (33% v/v) and left to react for 15 hours. Then, a 1:1 mixture of  $\text{CD}_3\text{COCD}_3$  and  $\text{CH}_3\text{COCH}_3$  (0.8 ml) was added and the solution was immediately monitored by ESI-MS. Time evolution of the relative concentration of  $[(\text{PMe}_3)\text{Au}(\text{CH}_3\text{COCH}_3)]^+$  ( $m/z$  331) with respect to the sum of both gold acetone complexes  $[(\text{PMe}_3)\text{Au}(\text{CD}_3\text{COCD}_3)]^+$  and  $[(\text{PMe}_3)\text{Au}(\text{CD}_2\text{COCD}_3)]\text{D}^+$ . The purple lines show the evolution of the  $[(\text{PMe}_3)\text{Au}(\text{CH}_3\text{COCH}_3)]\text{D}^+$  species ( $m/z$  332).

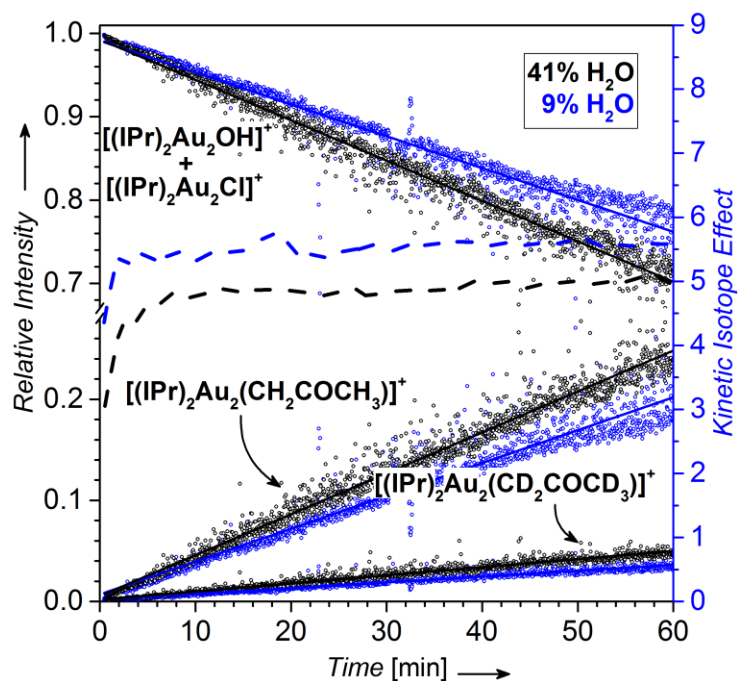

**Figure S34.** Results of the experiment, in which [(IPr)AuBF<sub>4</sub>] (358 µg) was dissolved in dioxane (0.2 ml) and 0.14 ml or 0.02 ml of H<sub>2</sub>O (41 % v/v or 9 % v/v, respectively) and left to react for 15 hours. Then, a 1:1 mixture of CH<sub>3</sub>COCH<sub>3</sub> and CD<sub>3</sub>COCD<sub>3</sub> (1.4 ml) was added and the solution was immediately monitored by ESI-MS. Time evolution of the relative concentrations of [(IPr)<sub>2</sub>Au<sub>2</sub>OH]<sup>+</sup> together with [(IPr)<sub>2</sub>Au<sub>2</sub>Cl]<sup>+</sup> (*m/z* 1187 + *m/z* 1205 + *m/z* 1207), [(IPr)<sub>2</sub>Au<sub>2</sub>(CH<sub>2</sub>COCH<sub>3</sub>)]<sup>+</sup> (*m/z* 1227) and [(IPr)<sub>2</sub>Au<sub>2</sub>(CD<sub>2</sub>COCD<sub>3</sub>)]<sup>+</sup> (*m/z* 1232) with respect to the sum of all these diaurated complexes in solution with H<sub>2</sub>O (41 % v/v in black and 9% v/v in blue; the lines serve to guide the eyes). The right-hand axis refers to the kinetic isotope effect for the formation of digold acetonides and the smoothed out ratio of [(IPr)<sub>2</sub>Au<sub>2</sub>(CH<sub>2</sub>COCH<sub>3</sub>)]<sup>+</sup> and [(IPr)<sub>2</sub>Au<sub>2</sub>(CD<sub>2</sub>COCD<sub>3</sub>)]<sup>+</sup> is shown as dashed lines.

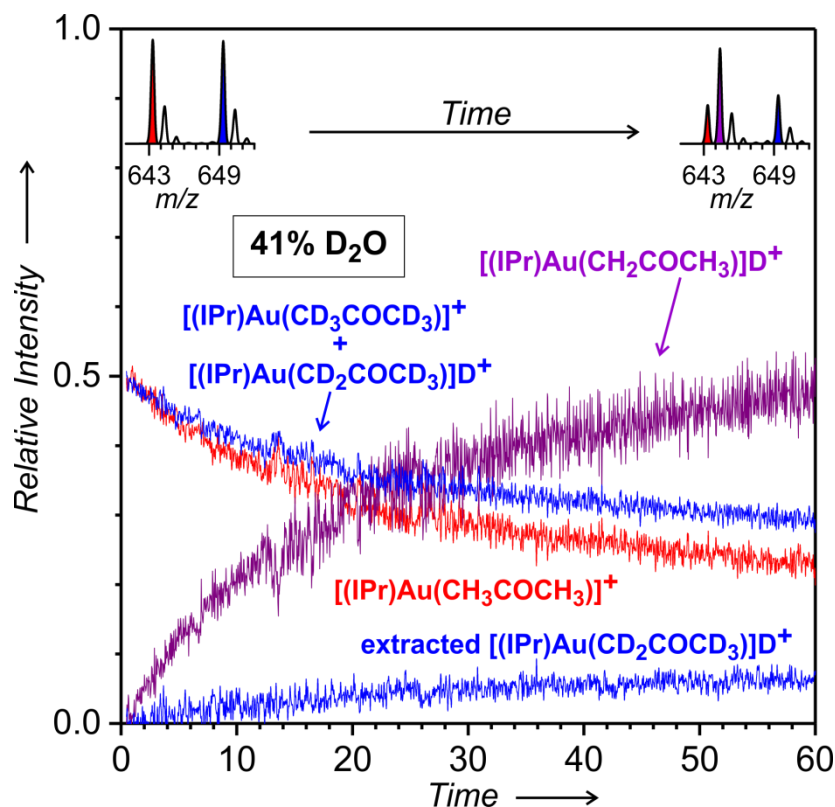

**Figure S35:** Results of the experiment, in which  $[(IPr)AuBF_4]$  (358  $\mu g$ ) was dissolved in dioxane (0.2 ml), 41% of  $D_2O$  (0.14 ml) and left to react for 15 hours. Then, a 1:1 mixture of  $CH_3COCH_3$  and  $CD_3COCD_3$  (1.4 ml) was added and the solution was immediately monitored by ESI-MS. Time evolution of the relative concentration of  $[(IPr)Au(CH_3COCH_3)]^+$  ( $m/z$  643) with respect to the sum of both gold acetone complexes  $[(IPr)Au(CD_3COCD_3)]^+$  and  $[(IPr)Au(CD_2COCD_3)]D^+$ . The purple lines show the evolution of the  $[(IPr)Au(CH_2COCH_3)]D^+$  species.

## C-H activation

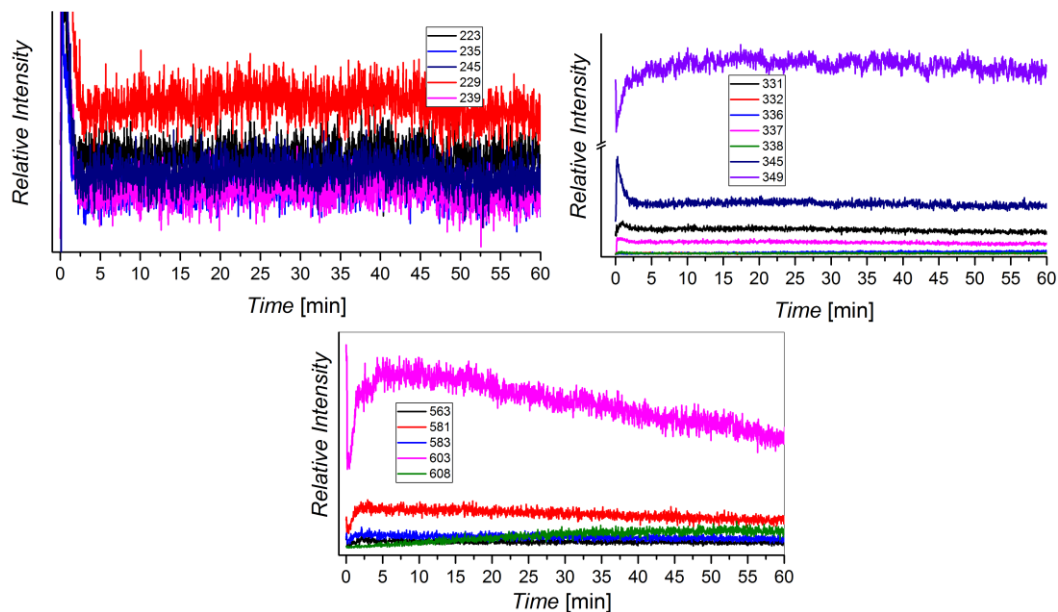

**Figure S36.** Results of the experiment, in which a final solution was prepared by addition of 0.4 ml of  $\text{CD}_3\text{COCD}_3$  to an overnight reaction mixture of  $[(\text{PMe}_3)\text{AuSbF}_6]$  (77  $\mu\text{g}$ ) in THF (0.8 ml),  $\text{H}_2\text{O}$  (0.6 ml) and  $\text{CH}_3\text{COCH}_3$  (0.4 ml). Then the solution was immediately monitored by ESI-MS. The sum of the signal intensities of the ion was normalized to TIC.

$[(^{107}\text{Ag}(\text{CH}_3\text{COCH}_3)_2)^+ (m/z\ 223), [^{107}\text{Ag}(\text{CH}_3\text{COCH}_3)(\text{CD}_3\text{COCD}_3)]^+ (m/z\ 229), [^{107}\text{Ag}(\text{CD}_3\text{COCD}_3)_2]^+ (m/z\ 235), [^{107}\text{Ag}(\text{CH}_3\text{COCH}_3)(\text{THF})]^+ (m/z\ 239), [^{109}\text{Ag}(\text{CD}_3\text{COCD}_3)(\text{THF})]^+ (m/z\ 245), [(\text{PMe}_3)\text{Au}(\text{CH}_3\text{COCH}_3)]^+ (m/z\ 331), [(\text{PMe}_3)\text{Au}(\text{CH}_2\text{COCH}_3)]\text{D}^+ (m/z\ 332), [(\text{PMe}_3)\text{Au}(\text{CD}_2\text{COCD}_3)]\text{H}^+ (m/z\ 336), [(\text{PMe}_3)\text{Au}(\text{CD}_3\text{COCD}_3)]^+ (m/z\ 337), [(\text{PMe}_3)\text{Au}(\text{CD}_2\text{COCD}_3)]\text{D}^+ (m/z\ 338), [(\text{PMe}_3)\text{Au}(\text{THF})]^+ (m/z\ 345), [(\text{PMe}_3)_2\text{Au}]^+ (m/z\ 349), [(\text{PMe}_3)_2\text{Au}_2(\text{OH})]^+ (m/z\ 563), [(\text{PMe}_3)_2\text{Au}_2(\text{Cl})]^+ (m/z\ 581), [(\text{PMe}_3)_2\text{Au}_2(^{37}\text{Cl})]^+ (m/z\ 583), [(\text{PMe}_3)_2\text{Au}_2(\text{CH}_2\text{COCH}_3)]^+ (m/z\ 603), [(\text{PMe}_3)_2\text{Au}_2(\text{CD}_2\text{COCD}_3)]^+ (m/z\ 608).$

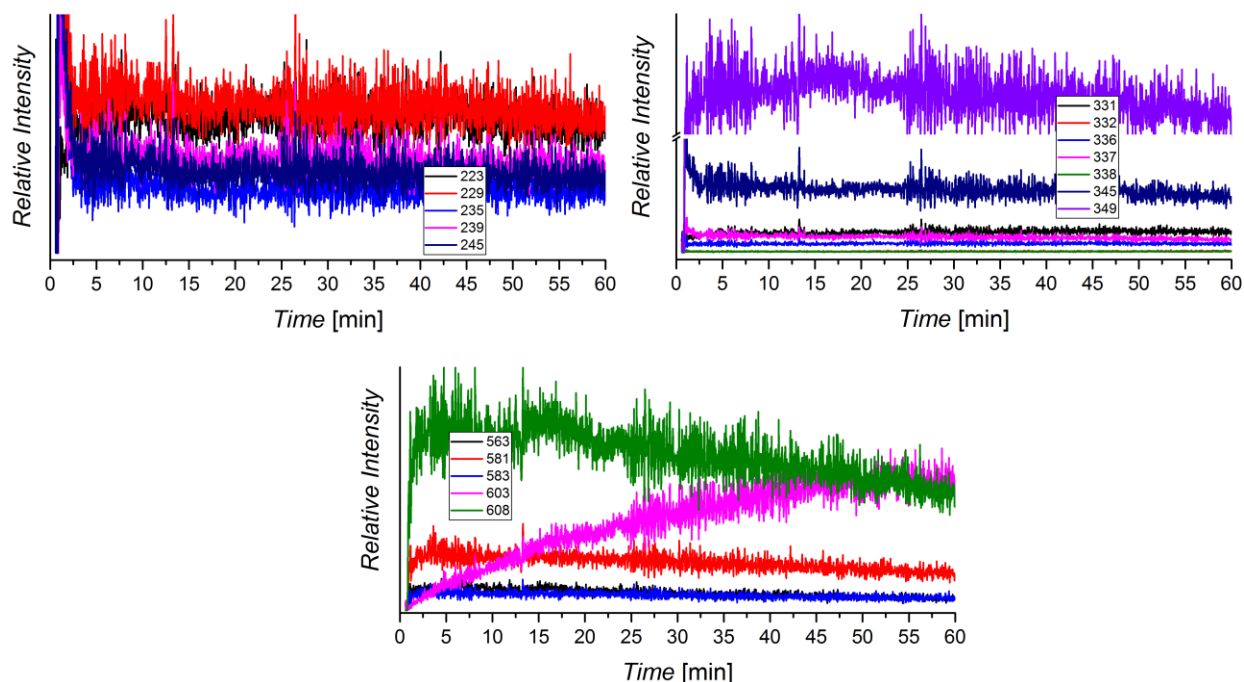

**Figure S37.** Results of the experiment, in which a final solution was prepared by addition of 0.4 ml of  $\text{CH}_3\text{COCH}_3$  to an overnight reaction mixture of  $[(\text{PMe}_3)\text{AuSbF}_6]$  (77  $\mu\text{g}$ ) in THF (0.8 ml),  $\text{H}_2\text{O}$  (0.6 ml) and  $\text{CD}_3\text{COCD}_3$  (0.4 ml). Then the solution was immediately monitored by ESI-MS. The sum of the signal intensities of the ions was normalized to TIC.

$[(^{107}\text{Ag}(\text{CH}_3\text{COCH}_3)_2)^+ (m/z\ 223), [^{107}\text{Ag}(\text{CH}_3\text{COCH}_3)(\text{CD}_3\text{COCD}_3)]^+ (m/z\ 229), [^{107}\text{Ag}(\text{CD}_3\text{COCD}_3)_2]^+ (m/z\ 235), [^{107}\text{Ag}(\text{CH}_3\text{COCH}_3)(\text{THF})]^+ (m/z\ 239), [^{109}\text{Ag}(\text{CD}_3\text{COCD}_3)(\text{THF})]^+ (m/z\ 245), [(\text{PMe}_3)\text{Au}(\text{CH}_3\text{COCH}_3)]^+ (m/z\ 331), [(\text{PMe}_3)\text{Au}(\text{CH}_2\text{COCH}_3)]\text{D}^+ (m/z\ 332), [(\text{PMe}_3)\text{Au}(\text{CD}_2\text{COCD}_3)]\text{H}^+ (m/z\ 336), [(\text{PMe}_3)\text{Au}(\text{CD}_3\text{COCD}_3)]^+ (m/z\ 337), [(\text{PMe}_3)\text{Au}(\text{CD}_2\text{COCD}_3)]\text{D}^+ (m/z\ 338), [(\text{PMe}_3)\text{Au}(\text{THF})]^+ (m/z\ 345), [(\text{PMe}_3)_2\text{Au}]^+ (m/z\ 349), [(\text{PMe}_3)_2\text{Au}_2(\text{OH})]^+ (m/z\ 563), [(\text{PMe}_3)_2\text{Au}_2(\text{Cl})]^+ (m/z\ 581), [(\text{PMe}_3)_2\text{Au}_2(^{37}\text{Cl})]^+ (m/z\ 583), [(\text{PMe}_3)_2\text{Au}_2(\text{CH}_2\text{COCH}_3)]^+ (m/z\ 603), [(\text{PMe}_3)_2\text{Au}_2(\text{CD}_2\text{COCD}_3)]^+ (m/z\ 608).$



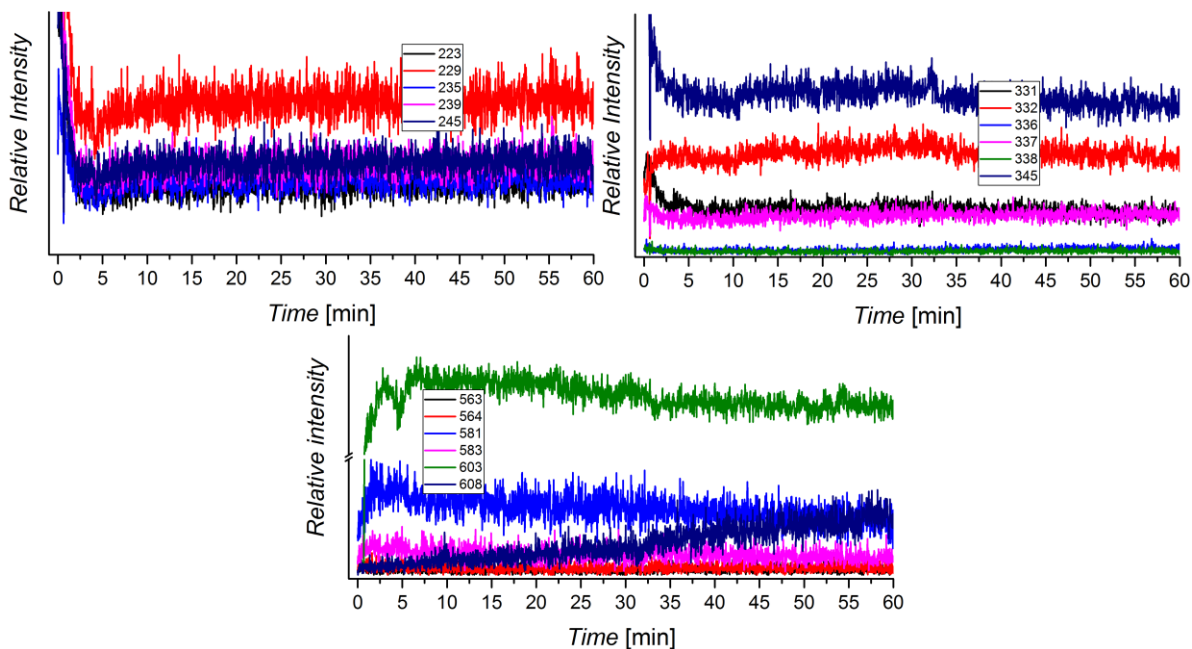

**Figure S38.** Results of the experiment, in which a final solution was prepared by addition of 0.4 ml of  $\text{CH}_3\text{COCH}_3$  to an overnight reaction mixture of  $[(\text{PMe}_3)_3\text{AuSbF}_6]$  (77  $\mu\text{g}$ ) in THF (0.8 ml),  $\text{D}_2\text{O}$  (0.6 ml) and  $\text{CD}_3\text{COCD}_3$  (0.4 ml). Then the solution was immediately monitored by ESI-MS. The sum of the signal intensities of the ions was normalized to TIC.

$[(^{107}\text{Ag}(\text{CH}_3\text{COCH}_3)_2)^+ (m/z \text{ 223})]$ ,  $[(^{107}\text{Ag}(\text{CH}_3\text{COCH}_3)(\text{CD}_3\text{COCD}_3))^+ (m/z \text{ 229})]$ ,  $[(^{107}\text{Ag}(\text{CD}_3\text{COCD}_3)_2)^+ (m/z \text{ 235})]$ ,  $[(^{107}\text{Ag}(\text{CH}_3\text{COCH}_3)(\text{THF}))^+ (m/z \text{ 239})]$ ,  $[(^{109}\text{Ag}(\text{CD}_3\text{COCD}_3)(\text{THF}))^+ (m/z \text{ 245})]$ ,  $[(\text{PMe}_3)_3\text{Au}(\text{CH}_3\text{COCH}_3)]^+ (m/z \text{ 331})$ ,  $[(\text{PMe}_3)_3\text{Au}(\text{CH}_2\text{COCH}_3)]\text{D}^+ (m/z \text{ 332})$ ,  $[(\text{PMe}_3)_3\text{Au}(\text{CD}_2\text{COCD}_3)]\text{H}^+ (m/z \text{ 336})$ ,  $[(\text{PMe}_3)_3\text{Au}(\text{CD}_3\text{COCD}_3)]^+ (m/z \text{ 337})$ ,  $[(\text{PMe}_3)_3\text{Au}(\text{CD}_2\text{COCD}_3)]\text{D}^+ (m/z \text{ 338})$ ,  $[(\text{PMe}_3)_3\text{Au}(\text{THF})]^+ (m/z \text{ 345})$ ,  $[(\text{PMe}_3)_2\text{Au}]^+ (m/z \text{ 349})$ ,  $[(\text{PMe}_3)_2\text{Au}_2(\text{OH})]^+ (m/z \text{ 563})$ ,  $[(\text{PMe}_3)_2\text{Au}_2(\text{Cl})]^+ (m/z \text{ 581})$ ,  $[(\text{PMe}_3)_2\text{Au}_2(^{37}\text{Cl})]^+ (m/z \text{ 583})$ ,  $[(\text{PMe}_3)_2\text{Au}_2(\text{CH}_2\text{COCH}_3)]^+ (m/z \text{ 603})$ ,  $[(\text{PMe}_3)_2\text{Au}_2(\text{CD}_2\text{COCD}_3)]^+ (m/z \text{ 608})$ .

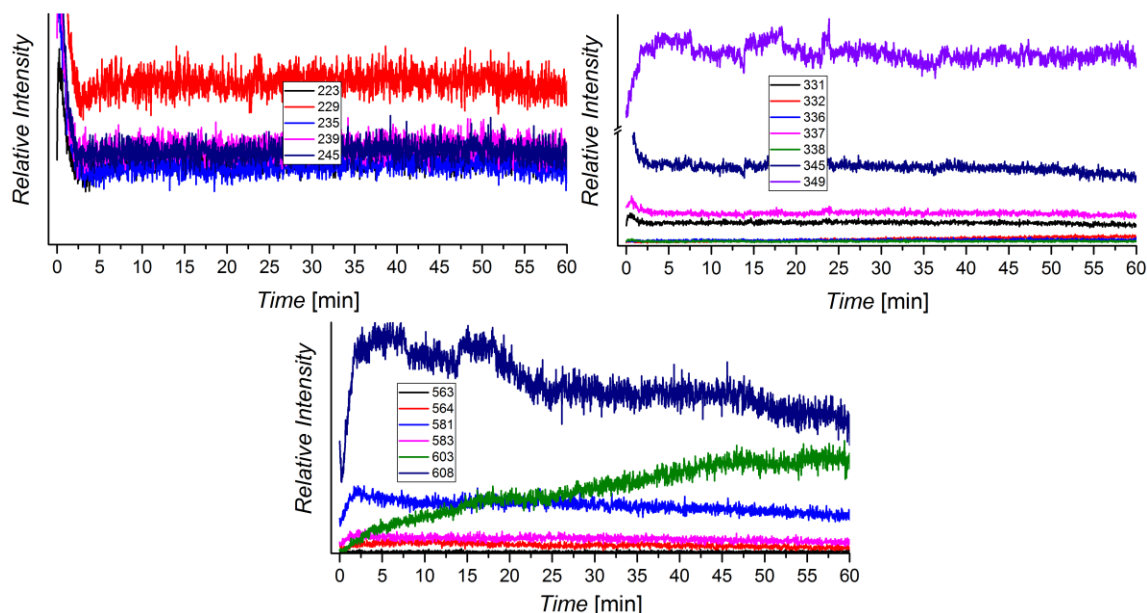

**Figure S39.** Results of the experiment, in which a final solution was prepared by addition of 0.4 ml of  $\text{CD}_3\text{COCD}_3$  to an overnight reaction mixture of  $[(\text{PMe}_3)\text{AuSbF}_6]$  (77  $\mu\text{g}$ ) in THF (0.8 ml),  $\text{D}_2\text{O}$  (0.6 ml) and  $\text{CH}_3\text{COCH}_3$  (0.4 ml). Then the solution was immediately monitored by ESI-MS. The sum of the signal intensities of the ions was normalized to TIC.

$[(^{107}\text{Ag}(\text{CH}_3\text{COCH}_3)_2)^+ (m/z \text{ 223})]$ ,  $[(^{107}\text{Ag}(\text{CH}_3\text{COCH}_3)(\text{CD}_3\text{COCD}_3))^+ (m/z \text{ 229})]$ ,  $[(^{107}\text{Ag}(\text{CD}_3\text{COCD}_3)_2)^+ (m/z \text{ 235})]$ ,  $[(^{107}\text{Ag}(\text{CH}_3\text{COCH}_3)(\text{THF}))^+ (m/z \text{ 239})]$ ,  $[(^{109}\text{Ag}(\text{CD}_3\text{COCD}_3)(\text{THF}))^+ (m/z \text{ 245})]$ ,  $[(\text{PMe}_3)\text{Au}(\text{CH}_3\text{COCH}_3)]^+ (m/z \text{ 331})]$ ,  $[(\text{PMe}_3)\text{Au}(\text{CH}_2\text{COCH}_3)]\text{D}^+ (m/z \text{ 332})]$ ,  $[(\text{PMe}_3)\text{Au}(\text{CD}_2\text{COCD}_3)]\text{H}^+ (m/z \text{ 336})]$ ,  $[(\text{PMe}_3)\text{Au}(\text{CD}_3\text{COCD}_3)]^+ (m/z \text{ 337})]$ ,  $[(\text{PMe}_3)\text{Au}(\text{CD}_2\text{COCD}_3)]\text{D}^+ (m/z \text{ 338})]$ ,  $[(\text{PMe}_3)\text{Au}(\text{THF})]^+ (m/z \text{ 345})]$ ,  $[(\text{PMe}_3)_2\text{Au}]^+ (m/z \text{ 349})]$ ,  $[(\text{PMe}_3)_2\text{Au}_2(\text{OH})]^+ (m/z \text{ 563})]$ ,  $[(\text{PMe}_3)_2\text{Au}_2(\text{Cl})]^+ (m/z \text{ 581})]$ ,  $[(\text{PMe}_3)_2\text{Au}_2(^{37}\text{Cl})]^+ (m/z \text{ 583})]$ ,  $[(\text{PMe}_3)_2\text{Au}_2(\text{CH}_2\text{COCH}_3)]^+ (m/z \text{ 603})]$ ,  $[(\text{PMe}_3)_2\text{Au}_2(\text{CD}_2\text{COCD}_3)]^+ (m/z \text{ 608})]$ .

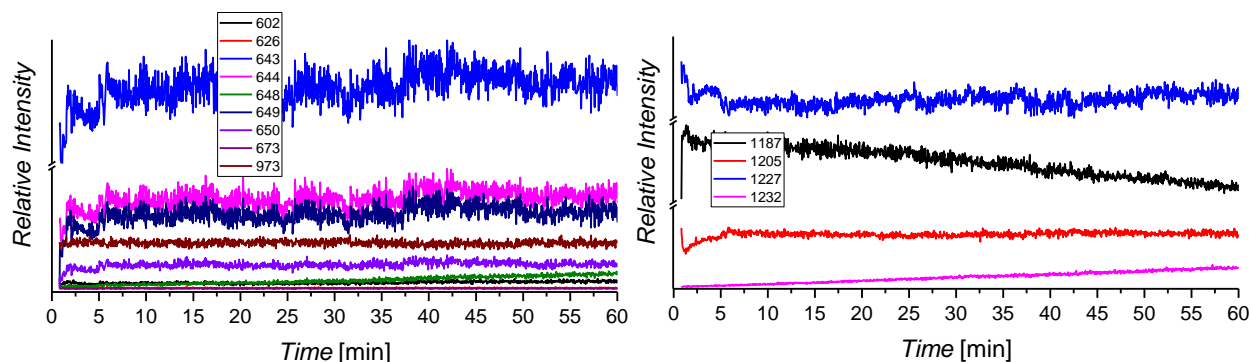

**Figure S40.** Results of the experiment, in which a final solution was prepared by addition of 0.7 ml of  $\text{CD}_3\text{COCD}_3$  to an overnight reaction mixture of  $[(\text{IPr})\text{AuBF}_4]$  (358  $\mu\text{g}$ ) in dioxane (0.2 ml),  $\text{H}_2\text{O}$  (0.45 ml) and  $\text{CH}_3\text{COCH}_3$  (0.7 ml). Then the solution was immediately monitored by ESI-MS. The sum of the signal intensities of the ions was normalized to TIC.

$[(\text{IPr})\text{Au}(\text{H}_2\text{O})]^+$  ( $m/z$  602),  $[(\text{IPr})\text{Au}(\text{CH}_3\text{CN})]^+$  ( $m/z$  626),  $[(\text{IPr})\text{Au}(\text{CH}_3\text{COCH}_3)]^+$  ( $m/z$  643),  $[(\text{IPr})\text{Au}(\text{CH}_3\text{COCH}_3)]^+$  ( $m/z$  644),  $[(\text{IPr})\text{Au}(\text{CD}_2\text{COCH}_3)]\text{H}^+$  ( $m/z$  648),  $[(\text{IPr})\text{Au}(\text{CD}_3\text{COCD}_3)]^+$  ( $m/z$  649),  $[(\text{IPr})\text{Au}({}^{13}\text{CH}_3\text{COCH}_3)]^+$  ( $m/z$  650),  $[(\text{IPr})_2\text{Au}(\text{CH}_3\text{COCH}_3)]^+$  ( $m/z$  973),  $[(\text{IPr})_2\text{Au}_2(\text{OH})]^+$  ( $m/z$  1187),  $[(\text{IPr})_2\text{Au}_2(\text{Cl})]^+$  ( $m/z$  1205),  $[(\text{IPr})_2\text{Au}_2(\text{CH}_2\text{COCH}_3)]^+$  ( $m/z$  1227),  $[(\text{IPr})_2\text{Au}_2(\text{CD}_2\text{COCD}_3)]^+$  ( $m/z$  1232).

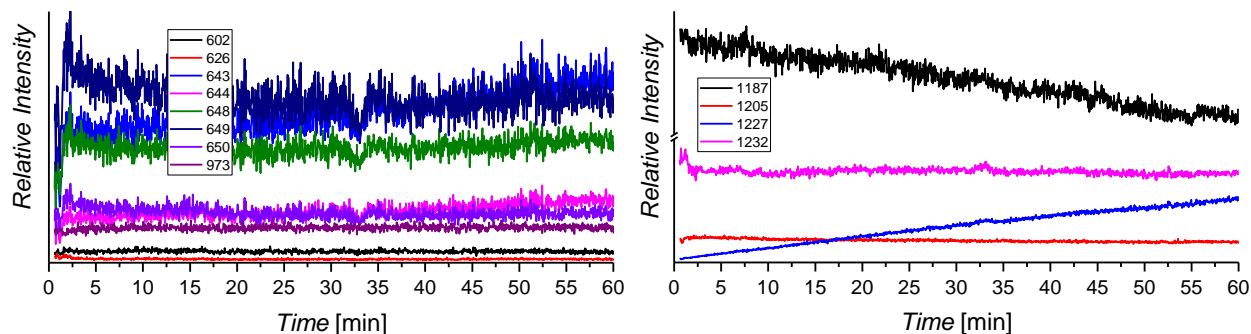

**Figure S41.** Results of the experiment, in which a final solution was prepared by addition of 0.7 ml of  $\text{CH}_3\text{COCH}_3$  to an overnight reaction mixture of  $[(\text{IPr})\text{AuBF}_4]$  (358  $\mu\text{g}$ ) in dioxane (0.2 ml),  $\text{H}_2\text{O}$  (0.45 ml) and  $\text{CD}_3\text{COCD}_3$  (0.7 ml). Then the solution was immediately monitored by ESI-MS. The sum of the signal intensities of the ions was normalized to TIC.

$[(\text{IPr})\text{Au}(\text{H}_2\text{O})]^+$  ( $m/z$  602),  $[(\text{IPr})\text{Au}(\text{CH}_3\text{CN})]^+$  ( $m/z$  626),  $[(\text{IPr})\text{Au}(\text{CH}_3\text{COCH}_3)]^+$  ( $m/z$  643),  $[(\text{IPr})\text{Au}(\text{CH}_3\text{COCH}_3)]^+$  ( $m/z$  644),  $[(\text{IPr})\text{Au}(\text{CD}_2\text{COCH}_3)]\text{H}^+$  ( $m/z$  648),  $[(\text{IPr})\text{Au}(\text{CD}_3\text{COCD}_3)]^+$  ( $m/z$  649),  $[(\text{IPr})\text{Au}({}^{13}\text{CH}_3\text{COCH}_3)]^+$  ( $m/z$  650),  $[(\text{IPr})_2\text{Au}(\text{CH}_3\text{COCH}_3)]^+$  ( $m/z$  973),  $[(\text{IPr})_2\text{Au}_2(\text{OH})]^+$  ( $m/z$  1187),  $[(\text{IPr})_2\text{Au}_2(\text{Cl})]^+$  ( $m/z$  1205),  $[(\text{IPr})_2\text{Au}_2(\text{CH}_2\text{COCH}_3)]^+$  ( $m/z$  1227),  $[(\text{IPr})_2\text{Au}_2(\text{CD}_2\text{COCD}_3)]^+$  ( $m/z$  1232).

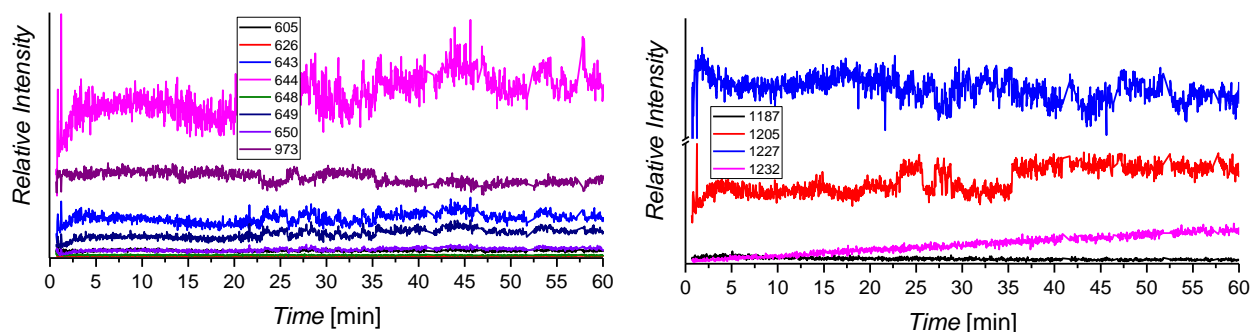

**Figure S42.** Results of the experiment, in which a final solution was prepared by addition of 0.7 ml of  $\text{CD}_3\text{COCD}_3$  to an overnight reaction mixture of  $[(\text{IPr})\text{AuBF}_4]$  (358  $\mu\text{g}$ ) in dioxane (0.2 ml),  $\text{D}_2\text{O}$  (0.45 ml) and  $\text{CH}_3\text{COCH}_3$  (0.7 ml). Then the solution was immediately monitored by ESI-MS. The sum of the signal intensities of the ions was normalized to TIC.

$[(\text{IPr})\text{Au}(\text{H}_2\text{O})]^+$  ( $m/z$  602),  $[(\text{IPr})\text{Au}(\text{CH}_3\text{CN})]^+$  ( $m/z$  626),  $[(\text{IPr})\text{Au}(\text{CH}_3\text{COCH}_3)]^+$  ( $m/z$  643),  $[(\text{IPr})\text{Au}(\text{CH}_3\text{COCH}_3)]^+$  ( $m/z$  644),  $[(\text{IPr})\text{Au}(\text{CD}_2\text{COCH}_3)]\text{H}^+$  ( $m/z$  648),  $[(\text{IPr})\text{Au}(\text{CD}_3\text{COCD}_3)]^+$  ( $m/z$  649),  $[(\text{IPr})\text{Au}({}^{13}\text{CH}_3\text{COCH}_3)]^+$  ( $m/z$  650),  $[(\text{IPr})_2\text{Au}(\text{CH}_3\text{COCH}_3)]^+$  ( $m/z$  973),  $[(\text{IPr})_2\text{Au}_2(\text{OH})]^+$  ( $m/z$  1187),  $[(\text{IPr})_2\text{Au}_2(\text{Cl})]^+$  ( $m/z$  1205),  $[(\text{IPr})_2\text{Au}_2(\text{CH}_2\text{COCH}_3)]^+$  ( $m/z$  1227),  $[(\text{IPr})_2\text{Au}_2(\text{CD}_2\text{COCD}_3)]^+$  ( $m/z$  1232).

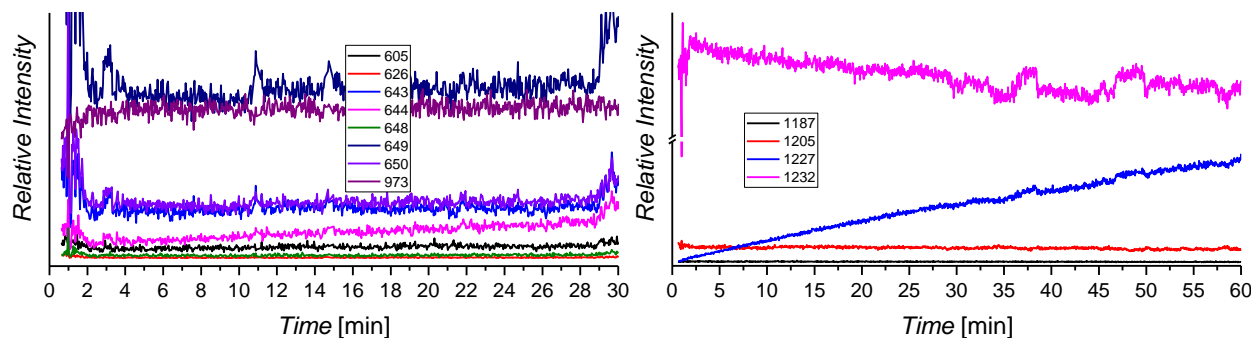

**Figure S43.** Results of the experiment, in which a final solution was prepared by addition of 0.7 ml of  $\text{CH}_3\text{COCH}_3$  to an overnight reaction mixture of  $[(\text{IPr})\text{AuBF}_4]$  (358  $\mu\text{g}$ ) in dioxane (0.2 ml),  $\text{D}_2\text{O}$  (0.45 ml) and  $\text{CD}_3\text{COCD}_3$  (0.7 ml). Then the solution was immediately monitored by ESI-MS. The sum of the signal intensities of the ions was normalized to TIC.

$[(\text{IPr})\text{Au}(\text{H}_2\text{O})]^+$  ( $m/z$  602),  $[(\text{IPr})\text{Au}(\text{CH}_3\text{CN})]^+$  ( $m/z$  626),  $[(\text{IPr})\text{Au}(\text{CH}_3\text{COCH}_3)]^+$  ( $m/z$  643),  $[(\text{IPr})\text{Au}(\text{CH}_3\text{COCH}_3)]^+$  ( $m/z$  644),  $[(\text{IPr})\text{Au}(\text{CD}_2\text{COCH}_3)]\text{H}^+$  ( $m/z$  648),  $[(\text{IPr})\text{Au}(\text{CD}_3\text{COCD}_3)]^+$  ( $m/z$  649),  $[(\text{IPr})\text{Au}({}^{13}\text{CH}_3\text{COCH}_3)]^+$  ( $m/z$  650),  $[(\text{IPr})_2\text{Au}(\text{CH}_3\text{COCH}_3)]^+$  ( $m/z$  973),  $[(\text{IPr})_2\text{Au}_2(\text{OH})]^+$  ( $m/z$  1187),  $[(\text{IPr})_2\text{Au}_2(\text{Cl})]^+$  ( $m/z$  1205),  $[(\text{IPr})_2\text{Au}_2(\text{CH}_2\text{COCH}_3)]^+$  ( $m/z$  1227),  $[(\text{IPr})_2\text{Au}_2(\text{CD}_2\text{COCD}_3)]^+$  ( $m/z$  1232).

## ESI-MS source and CID spectra

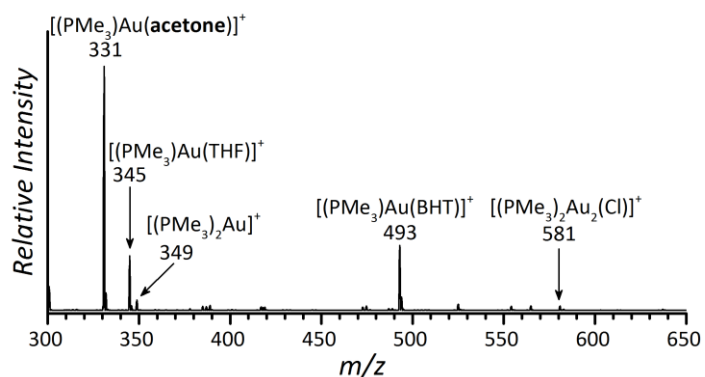

**Figure S44.** The ESI-MS source spectrum of  $[(PMe_3)Au(SbF_6)]$  (77  $\mu$ g) complex in dry THF (0.8 ml) and acetone (0.4 ml).

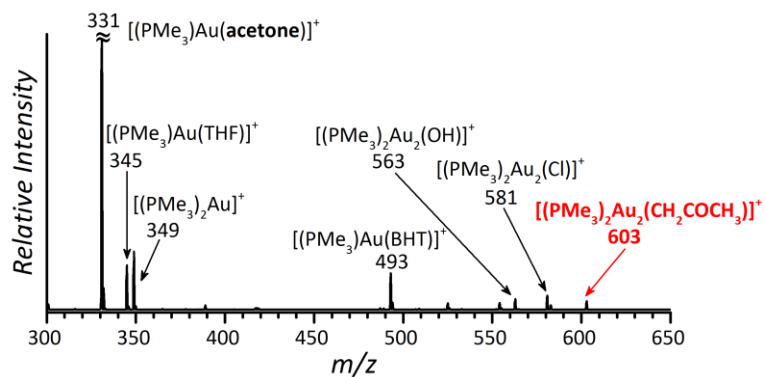

**Figure S45.** The ESI-MS source spectrum of  $[(PMe_3)Au(SbF_6)]$  (77  $\mu$ g) complex in dry THF (0.8 ml) and acetone (0.4 ml), upon water (0.4 ml) addition.

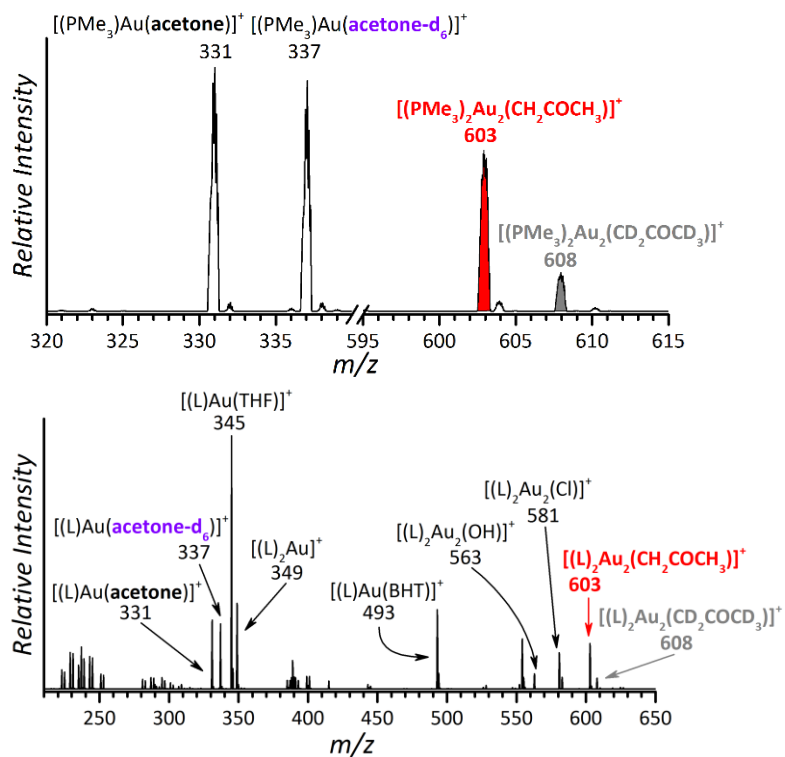

**Figure S46.** The ESI-MS source spectrum of  $[(\text{PMe}_3)\text{Au}(\text{SbF}_6)]$  (77  $\mu\text{g}$ ) complex in THF (0.8 ml), acetone (0.4 ml) and acetone- $\text{d}_6$  (0.4 ml), upon water (0.8 ml) addition. ( $\text{L} = \text{PMe}_3$ )

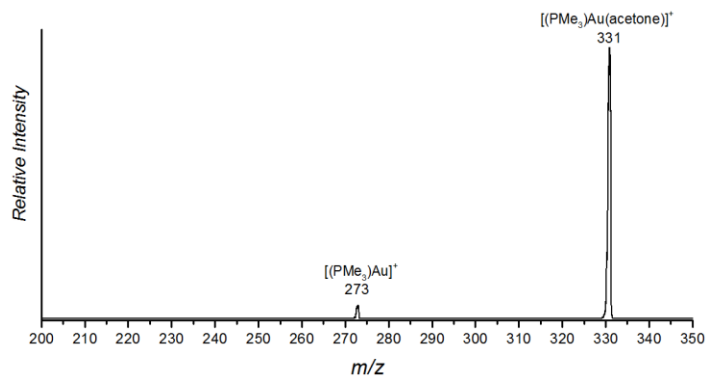

**Figure S47:** CID (Collision Induced Dissociation) experiment for the mass selected  $[(\text{PMe}_3)\text{Au}(\text{acetone})]^+$  ion with  $m/z$  331. The main fragmentation channel leads to the loss of acetone.

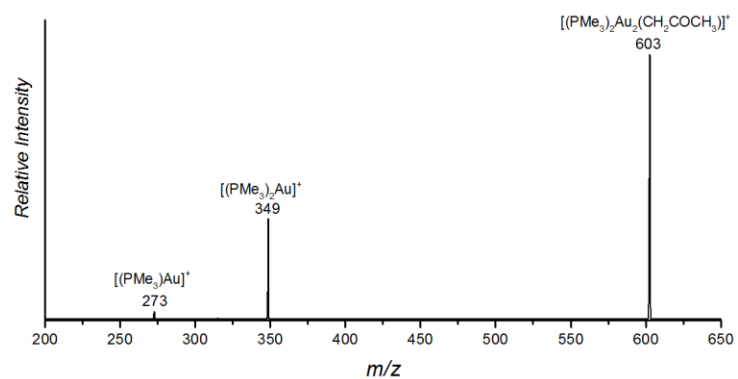

**Figure S48:** CID (Collision Induced Dissociation) experiment for the mass selected  $[(PMe_3)_2Au_2(CH_2COCH_3)]^+$  ion with  $m/z$  603. The main fragmentation channels is the loss of neutral  $Au(CH_2COCH_3)$ .

## IRPD spectrum for $[\text{Au}(\text{IPr})(\text{BF}_4)]$

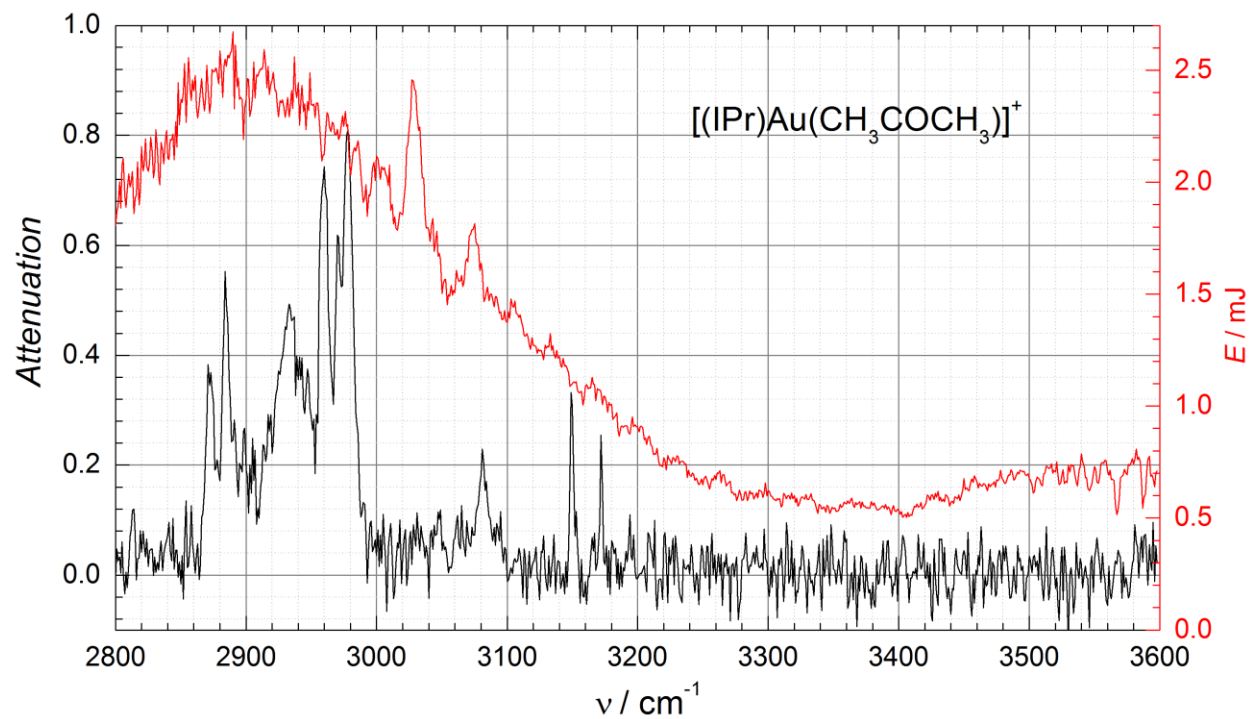

**Figure 49:** IRPD spectrum (in black) of the mass selected ion  $[(\text{IPr})\text{Au}(\text{CH}_3\text{COCH}_3)]^+$  with  $m/z$  643 and the power of the OPO/OPA is in red.



## Computational results

**Table S1.** Geometries and energetics for the stationary points on the potential energy surface shown in Figure 9 of the main document. The structures were optimized at the M06-D3/6-311+G\*(SDD: Au) + SMD (water) level of theory.

|   |                                                                                                                                                                                                                                                                                                                                                                                                                                                                                                                                                                                                                                                                                                                                                                                                                                                                                                                                                                                                                                                                                                                                                                                                                                                                                                                                                                                                                                                                                                                                                                                                                                                                                                                                                                                                                                                                                                                                                                                                                                                                                                                                                                                                                                                                                                                                                                                                                                                                                                                                                                                      |
|---|--------------------------------------------------------------------------------------------------------------------------------------------------------------------------------------------------------------------------------------------------------------------------------------------------------------------------------------------------------------------------------------------------------------------------------------------------------------------------------------------------------------------------------------------------------------------------------------------------------------------------------------------------------------------------------------------------------------------------------------------------------------------------------------------------------------------------------------------------------------------------------------------------------------------------------------------------------------------------------------------------------------------------------------------------------------------------------------------------------------------------------------------------------------------------------------------------------------------------------------------------------------------------------------------------------------------------------------------------------------------------------------------------------------------------------------------------------------------------------------------------------------------------------------------------------------------------------------------------------------------------------------------------------------------------------------------------------------------------------------------------------------------------------------------------------------------------------------------------------------------------------------------------------------------------------------------------------------------------------------------------------------------------------------------------------------------------------------------------------------------------------------------------------------------------------------------------------------------------------------------------------------------------------------------------------------------------------------------------------------------------------------------------------------------------------------------------------------------------------------------------------------------------------------------------------------------------------------|
| A | TT1.log                                                                                                                                                                                                                                                                                                                                                                                                                                                                                                                                                                                                                                                                                                                                                                                                                                                                                                                                                                                                                                                                                                                                                                                                                                                                                                                                                                                                                                                                                                                                                                                                                                                                                                                                                                                                                                                                                                                                                                                                                                                                                                                                                                                                                                                                                                                                                                                                                                                                                                                                                                              |
|   | <p>Low frequencies --- -5.3789 -0.0012 -0.0012 -0.0011 10.2867 16.2408</p> <p>Low frequencies --- 29.3364 33.1439 40.8786</p> <p>Zero-point correction= 0.328056 (Hartree/Particle)</p> <p>Thermal correction to Energy= 0.354632</p> <p>Thermal correction to Enthalpy= 0.355576</p> <p>Thermal correction to Gibbs Free Energy= 0.268380</p> <p>Sum of electronic and zero-point Energies= -1462.117529</p> <p>Sum of electronic and thermal Energies= -1462.090952</p> <p>Sum of electronic and thermal Enthalpies= -1462.090008</p> <p>Sum of electronic and thermal Free Energies= -1462.177204</p> <p>C,0,1.5959369042,-2.5388430028,-0.4231908803</p> <p>P,0,2.4493859503,-0.9445709425,-0.5487412296</p> <p>Au,0,1.188515906,0.8014901682,0.2276594539</p> <p>Au,0,-1.8228314463,1.3458263612,0.1756722729</p> <p>O,0,-0.0902121776,2.4166902996,0.8667680309</p> <p>C,0,4.0351261932,-1.2016322643,0.2891050707</p> <p>C,0,2.8676005037,-0.7990772574,-2.3066095783</p> <p>O,0,5.0352429967,1.8187130612,-1.0159037748</p> <p>C,0,4.1786053506,2.5319767112,-0.5157638673</p> <p>C,0,3.2328130581,3.327821082,-1.3500034999</p> <p>C,0,4.0403341232,2.6660554376,0.9652690657</p> <p>P,0,-3.6003170127,0.1633550691,-0.6462378873</p> <p>C,0,-4.7487617532,-0.4532498776,0.6123333155</p> <p>C,0,-3.0769275183,-1.3173373493,-1.5516137192</p> <p>C,0,-4.6506536438,1.0681156501,-1.8132790991</p> <p>H,0,2.2248205555,-3.3314126204,-0.8448847585</p> <p>H,0,1.3798447463,-2.7689764682,0.623931465</p> <p>H,0,0.6518498255,-2.4963509438,-0.9746637017</p> <p>H,0,-5.542076971,-1.0369850118,0.1312635261</p> <p>H,0,-4.2165951072,-1.089500836,1.3251259774</p> <p>H,0,-5.1963618021,0.3840271041,1.1550295742</p> <p>H,0,3.5284756803,3.330623818,-2.4016069626</p> <p>H,0,2.2310314412,2.8829937532,-1.2582959126</p> <p>H,0,3.1499738494,4.3538986851,-0.9742349517</p> <p>H,0,4.4850538394,1.813586352,1.4859933842</p> <p>H,0,4.5737295348,3.575554069,1.2742838004</p> <p>H,0,3.4066943432,0.1346298284,-2.4905810309</p> <p>H,0,3.4944922896,-1.6451014426,-2.6111394165</p> <p>H,0,1.9505252929,-0.7962729976,-2.9030552574</p> <p>H,0,4.6998050884,-0.3528051848,0.1019233712</p> <p>H,0,3.8811043318,-1.3017923109,1.3672690161</p> <p>H,0,4.5052534758,-2.1153253029,-0.0931391809</p> <p>H,0,-2.4116152725,-1.0379770621,-2.3738197409</p> <p>H,0,-2.5354918237,-1.9898140038,-0.8793594459</p> <p>H,0,-3.9522748098,-1.8389254565,-1.9557659651</p> <p>H,0,-4.0604956576,1.3936875764,-2.6744768868</p> <p>H,0,-5.4620246411,0.4164382668,-2.1574540915</p> |

|          |                                                                                                                                                                                                                                                                                                                                                                                                                                                                                                                                                                                                                                                                                                                                                                                                                                                                                                                                                                                                                                                                                                                                                                                                                                                                                                                                                                                                                                                                                                                                                                                                                                                                                                                                                                                                                                                                                                                                                                                                                                                                                                                                                                                                                                                                                                                                                                                                                                                                                                                                                                     |
|----------|---------------------------------------------------------------------------------------------------------------------------------------------------------------------------------------------------------------------------------------------------------------------------------------------------------------------------------------------------------------------------------------------------------------------------------------------------------------------------------------------------------------------------------------------------------------------------------------------------------------------------------------------------------------------------------------------------------------------------------------------------------------------------------------------------------------------------------------------------------------------------------------------------------------------------------------------------------------------------------------------------------------------------------------------------------------------------------------------------------------------------------------------------------------------------------------------------------------------------------------------------------------------------------------------------------------------------------------------------------------------------------------------------------------------------------------------------------------------------------------------------------------------------------------------------------------------------------------------------------------------------------------------------------------------------------------------------------------------------------------------------------------------------------------------------------------------------------------------------------------------------------------------------------------------------------------------------------------------------------------------------------------------------------------------------------------------------------------------------------------------------------------------------------------------------------------------------------------------------------------------------------------------------------------------------------------------------------------------------------------------------------------------------------------------------------------------------------------------------------------------------------------------------------------------------------------------|
|          | H,0,-5.0782743664,1.949468359,-1.3273387451<br>H,0,-0.1106932248,2.3874515716,1.8306631691<br>H,0,2.993875948,2.7917291114,1.2636210905                                                                                                                                                                                                                                                                                                                                                                                                                                                                                                                                                                                                                                                                                                                                                                                                                                                                                                                                                                                                                                                                                                                                                                                                                                                                                                                                                                                                                                                                                                                                                                                                                                                                                                                                                                                                                                                                                                                                                                                                                                                                                                                                                                                                                                                                                                                                                                                                                             |
| <b>B</b> | TT_2.log<br><br>Low frequencies --- -9.3718 -0.0009 -0.0007 0.0004 9.6969 18.1289<br>Low frequencies --- 37.5633 46.7835 50.6424<br><br>Zero-point correction= 0.327880 (Hartree/Particle)<br>Thermal correction to Energy= 0.354346<br>Thermal correction to Enthalpy= 0.355290<br>Thermal correction to Gibbs Free Energy= 0.270158<br>Sum of electronic and zero-point Energies= -1462.114649<br>Sum of electronic and thermal Energies= -1462.088183<br>Sum of electronic and thermal Enthalpies= -1462.087238<br>Sum of electronic and thermal Free Energies= -1462.172370<br><br>C,0,3.2984904349,-0.9404771502,1.6196457699<br>P,0,2.7005347035,-1.0239975125,-0.0878083911<br>Au,0,1.2364545528,0.6636918073,-0.6134138394<br>O,0,-0.1034431844,2.306960957,-1.2413568186<br>C,0,-0.8161402844,2.9873944706,-0.4971092001<br>C,0,-0.6990422206,2.9391055796,0.9773302713<br>C,0,4.1995560917,-1.0629381796,-1.1032701833<br>C,0,1.983568536,-2.6805822951,-0.2425405481<br>Au,0,-0.9735491036,-0.6178821509,1.1959753678<br>P,0,-2.1467916784,-1.075653648,-0.7292365152<br>C,0,-1.1742831066,-1.8812282097,-2.0317096524<br>O,0,0.0870974547,-0.2235920961,2.961609265<br>C,0,-1.8521636166,3.869889012,-1.0820472416<br>C,0,-2.8660469605,0.36679343,-1.5669984934<br>C,0,-3.5596361709,-2.1837632301,-0.4745352525<br>H,0,4.0105245434,-1.7546563548,1.7978144491<br>H,0,3.7933361962,0.0184061121,1.7967052891<br>H,0,2.4577745252,-1.036711098,2.3124009919<br>H,0,-1.7907386601,-2.0104324962,-2.9289258244<br>H,0,-0.3054206214,-1.2592564017,-2.2767257703<br>H,0,-0.8297773991,-2.8626238964,-1.6930990704<br>H,0,-2.7978957485,3.7510102445,-0.5414568667<br>H,0,-1.5464581231,4.9138902352,-0.9347046703<br>H,0,-1.9920747805,3.6813488274,-2.1478796432<br>H,0,0.3138579006,2.6616923839,1.2844043185<br>H,0,-1.010427253,3.879208328,1.4404693576<br>H,0,1.7162704184,-2.8817011578,-1.2838899392<br>H,0,2.7158101435,-3.4255347252,0.0899310841<br>H,0,1.085034503,-2.7516936064,0.380486968<br>H,0,3.9350384155,-1.1793000686,-2.1579804677<br>H,0,4.7573200618,-0.1301693237,-0.9810187779<br>H,0,4.8325618419,-1.9031743346,-0.7951356821<br>H,0,-3.4184981743,0.9884026431,-0.8561933643<br>H,0,-2.0743832831,0.9625906172,-2.0299300973<br>H,0,-3.5500109714,0.0241907071,-2.3521216198<br>H,0,-4.2754694949,-1.7255444451,0.2141937771<br>H,0,-4.0579178127,-2.3822830698,-1.4305766038<br>H,0,-3.2184174296,-3.1293279452,-0.0430258684<br>H,0,-0.5489064745,-0.2791807261,3.6829634416<br>H,0,-1.3824827708,2.1504107667,1.3329570507 |
| <b>C</b> | TT_3.log                                                                                                                                                                                                                                                                                                                                                                                                                                                                                                                                                                                                                                                                                                                                                                                                                                                                                                                                                                                                                                                                                                                                                                                                                                                                                                                                                                                                                                                                                                                                                                                                                                                                                                                                                                                                                                                                                                                                                                                                                                                                                                                                                                                                                                                                                                                                                                                                                                                                                                                                                            |

|          |                                                                                                                                                                                                                                                                                                                                                                                                                                                                                                                                                                                                                                                                                                                                                                                                                                                                                                                                                                                                                                                                                                                                                                                                                                                                                                                                                                                                                                                                                                                                                                                                                                                                                                                                                                                                                                                                                                                                                                                                                                                                                                                                                                                                                                                                                                                                                                                                                                                                                                                                                                                                                      |
|----------|----------------------------------------------------------------------------------------------------------------------------------------------------------------------------------------------------------------------------------------------------------------------------------------------------------------------------------------------------------------------------------------------------------------------------------------------------------------------------------------------------------------------------------------------------------------------------------------------------------------------------------------------------------------------------------------------------------------------------------------------------------------------------------------------------------------------------------------------------------------------------------------------------------------------------------------------------------------------------------------------------------------------------------------------------------------------------------------------------------------------------------------------------------------------------------------------------------------------------------------------------------------------------------------------------------------------------------------------------------------------------------------------------------------------------------------------------------------------------------------------------------------------------------------------------------------------------------------------------------------------------------------------------------------------------------------------------------------------------------------------------------------------------------------------------------------------------------------------------------------------------------------------------------------------------------------------------------------------------------------------------------------------------------------------------------------------------------------------------------------------------------------------------------------------------------------------------------------------------------------------------------------------------------------------------------------------------------------------------------------------------------------------------------------------------------------------------------------------------------------------------------------------------------------------------------------------------------------------------------------------|
|          | <p>Low frequencies --- -22.3903 -13.5170 -0.0009 0.0008 0.0012 10.8798<br/> Low frequencies --- 29.4003 37.4171 47.3057</p> <p>Zero-point correction= 0.328356 (Hartree/Particle)<br/> Thermal correction to Energy= 0.354569<br/> Thermal correction to Enthalpy= 0.355514<br/> Thermal correction to Gibbs Free Energy= 0.270276<br/> Sum of electronic and zero-point Energies= -1462.099518<br/> Sum of electronic and thermal Energies= -1462.073305<br/> Sum of electronic and thermal Enthalpies= -1462.072360<br/> Sum of electronic and thermal Free Energies= -1462.157598</p> <p>C,0,0.558539764,-0.3958065306,0.2137758746<br/> P,0,0.3011746882,-0.1594751959,1.9937864855<br/> Au,0,2.2650766946,0.0300918125,3.1607910881<br/> O,0,4.1473435715,0.1769809069,4.1700402407<br/> C,0,4.91859321,1.2170251061,3.9309726784<br/> C,0,4.4942354763,2.4298246831,3.4924448682<br/> C,0,-0.7556959546,1.3103962607,2.0901211527<br/> C,0,-0.7803931237,-1.5276573925,2.4869670553<br/> Au,0,4.2372316177,-0.5871988171,0.8478649169<br/> P,0,4.1998782509,-2.8419953522,1.222492562<br/> C,0,2.5878252322,-3.6243943235,0.9572449034<br/> O,0,4.2942057566,1.6047549608,0.6115891589<br/> C,0,6.37270826,0.9401609227,4.1590673353<br/> C,0,4.6115985075,-3.2405343761,2.9415793406<br/> C,0,5.3595280593,-3.8145497903,0.2285396717<br/> H,0,-0.4107934817,-0.4274668795,-0.2976044571<br/> H,0,1.1496715206,0.4327679456,-0.1887366991<br/> H,0,1.0932270699,-1.3319054366,0.0256327044<br/> H,0,1.8310896164,-3.1429904645,1.5854609509<br/> H,0,2.2892822776,-3.5366970944,-0.0911754084<br/> H,0,2.6550090878,-4.6851035888,1.2248918151<br/> H,0,7.0016499731,1.8177651637,3.9864524286<br/> H,0,6.5378522972,0.5864707744,5.1838357708<br/> H,0,6.703406373,0.134047485,3.4902054387<br/> H,0,3.4287666072,2.6378440355,3.3840229895<br/> H,0,5.1917201993,3.2564656099,3.3845362401<br/> H,0,-1.0837868909,-1.4058841149,3.5306347082<br/> H,0,-1.6737280496,-1.5382601592,1.8518423499<br/> H,0,-0.2551764936,-2.4819996056,2.3851902661<br/> H,0,-1.0320509762,1.5091541008,3.1292079432<br/> H,0,-0.2191266662,2.1792866046,1.6979536313<br/> H,0,-1.6645003306,1.1504274909,1.4985133699<br/> H,0,5.5955441534,-2.837882385,3.1990057746<br/> H,0,3.8657273284,-2.8080042973,3.6155357215<br/> H,0,4.6224762765,-4.32938055,3.0697071023<br/> H,0,6.3825085175,-3.4709915798,0.4054799111<br/> H,0,5.2802090555,-4.8728845966,0.5026274473<br/> H,0,5.1290608126,-3.6993966608,-0.8342703228<br/> H,0,5.0764278967,1.8555756441,0.1030220214<br/> H,0,4.4371077147,1.9389246656,1.5309969353</p> |
| <b>D</b> | <p>TT_final.log</p> <p>Low frequencies --- -2.2232 0.0006 0.0011 0.0012 11.0027 22.8741<br/> Low frequencies --- 40.8566 42.6058 51.9501</p>                                                                                                                                                                                                                                                                                                                                                                                                                                                                                                                                                                                                                                                                                                                                                                                                                                                                                                                                                                                                                                                                                                                                                                                                                                                                                                                                                                                                                                                                                                                                                                                                                                                                                                                                                                                                                                                                                                                                                                                                                                                                                                                                                                                                                                                                                                                                                                                                                                                                         |

|       |                                                                                                                                                                                                                                                                                                                                                                                                                                                                                                                                                                                                                                                                                                                                                                                                                                                                                                                                                                                                                                                                                                                                                                                                                                                                                                                                                                                                                                                                                                                                                                                                                                                                                                                                                                                                                                                                                                                                                                                                                                                                                                                                                                                                                                                                                                                                                                                       |
|-------|---------------------------------------------------------------------------------------------------------------------------------------------------------------------------------------------------------------------------------------------------------------------------------------------------------------------------------------------------------------------------------------------------------------------------------------------------------------------------------------------------------------------------------------------------------------------------------------------------------------------------------------------------------------------------------------------------------------------------------------------------------------------------------------------------------------------------------------------------------------------------------------------------------------------------------------------------------------------------------------------------------------------------------------------------------------------------------------------------------------------------------------------------------------------------------------------------------------------------------------------------------------------------------------------------------------------------------------------------------------------------------------------------------------------------------------------------------------------------------------------------------------------------------------------------------------------------------------------------------------------------------------------------------------------------------------------------------------------------------------------------------------------------------------------------------------------------------------------------------------------------------------------------------------------------------------------------------------------------------------------------------------------------------------------------------------------------------------------------------------------------------------------------------------------------------------------------------------------------------------------------------------------------------------------------------------------------------------------------------------------------------------|
|       | Zero-point correction= 0.328919 (Hartree/Particle)<br>Thermal correction to Energy= 0.355312<br>Thermal correction to Enthalpy= 0.356257<br>Thermal correction to Gibbs Free Energy= 0.271753<br>Sum of electronic and zero-point Energies= -1462.116318<br>Sum of electronic and thermal Energies= -1462.089924<br>Sum of electronic and thermal Enthalpies= -1462.088980<br>Sum of electronic and thermal Free Energies= -1462.173484<br><br>C,0,-0.1922438165,-0.1317238251,-0.052234546<br>P,0,-0.1179677238,-0.0861441105,1.756858617<br>C,0,1.6540920363,-0.0427097101,2.1345863116<br>Au,0,-1.2629364241,1.6699879843,2.6798377146<br>Au,0,0.4993353732,2.7420527725,5.1831253632<br>P,0,1.4827557148,0.9243087428,6.3055686158<br>C,0,0.7191672748,-0.6857565505,5.9474286572<br>C,0,-0.6835023878,-1.7202070335,2.2928572548<br>O,0,-2.4076740605,3.2796309826,3.625674045<br>C,0,-1.7687894701,4.138944015,4.3101066099<br>C,0,-2.5496530282,4.8710929245,5.3500399763<br>C,0,-0.3885041388,4.4257247163,4.1325915973<br>C,0,1.4236599121,1.0424666559,8.1160798639<br>C,0,3.2421057431,0.6599730582,5.9435843407<br>H,0,0.4036510039,-0.9721570571,-0.4263884161<br>H,0,-1.2281213565,-0.2504301942,-0.3817222214<br>H,0,0.2031176916,0.8014770834,-0.464405286<br>H,0,1.9092315536,0.1660628377,8.5607315478<br>H,0,1.9409771304,1.9466054952,8.449702569<br>H,0,0.3853654191,1.0890212924,8.4573096288<br>H,0,-1.9033112956,5.3417198944,6.0948752354<br>H,0,-3.1295072352,5.6625192596,4.8580640907<br>H,0,-3.2628829853,4.204333862,5.8430250008<br>H,0,-0.0284223215,4.2766282337,3.1101172348<br>H,0,-0.0423421134,5.3519583167,4.5935943723<br>H,0,1.811133065,-0.0455660785,3.216830125<br>H,0,2.1491342211,-0.9161711024,1.6947375827<br>H,0,2.0979190243,0.8681181833,1.7220152601<br>H,0,-0.6507245305,-1.7943114604,3.3838115925<br>H,0,-1.7138983607,-1.8804574737,1.9628629571<br>H,0,-0.0408673481,-2.4937978544,1.857086526<br>H,0,3.3847765298,0.5007865991,4.8703511346<br>H,0,3.8215948482,1.5374813028,6.2450797091<br>H,0,3.6095241196,-0.2171164218,6.48913658<br>H,0,0.8874616921,-0.9530247111,4.8996541742<br>H,0,1.1647908351,-1.4583674427,6.5850791363<br>H,0,-0.3581099404,-0.6428443858,6.1321938233<br>O,0,1.212707628,3.4065791347,0.9226589583<br>H,0,0.3274992256,3.0185457362,0.9784639278<br>H,0,1.614934847,3.2268166956,1.7815383761 |
| TSB/C | TS_5.log<br><br>Low frequencies ----1502.2715 -18.7825 -16.0158 0.0002 0.0012 0.0012<br>Low frequencies --- 18.6336 37.0910 42.6323<br><br>Zero-point correction= 0.322769 (Hartree/Particle)<br>Thermal correction to Energy= 0.348425<br>Thermal correction to Enthalpy= 0.349370<br>Thermal correction to Gibbs Free Energy= 0.265653                                                                                                                                                                                                                                                                                                                                                                                                                                                                                                                                                                                                                                                                                                                                                                                                                                                                                                                                                                                                                                                                                                                                                                                                                                                                                                                                                                                                                                                                                                                                                                                                                                                                                                                                                                                                                                                                                                                                                                                                                                              |

|       |                                                                                                                                                                                                                                                                                                                                                                                                                                                                                                                                                                                                                                                                                                                                                                                                                                                                                                                                                                                                                                                                                                                                                                                                                                                                                                                                                                                                                                                                                                                                                                                                                                                                                                                                                                                                                                                                                                                                                                                                                                                                                                                                                                                                                                                                                                                                                                                        |
|-------|----------------------------------------------------------------------------------------------------------------------------------------------------------------------------------------------------------------------------------------------------------------------------------------------------------------------------------------------------------------------------------------------------------------------------------------------------------------------------------------------------------------------------------------------------------------------------------------------------------------------------------------------------------------------------------------------------------------------------------------------------------------------------------------------------------------------------------------------------------------------------------------------------------------------------------------------------------------------------------------------------------------------------------------------------------------------------------------------------------------------------------------------------------------------------------------------------------------------------------------------------------------------------------------------------------------------------------------------------------------------------------------------------------------------------------------------------------------------------------------------------------------------------------------------------------------------------------------------------------------------------------------------------------------------------------------------------------------------------------------------------------------------------------------------------------------------------------------------------------------------------------------------------------------------------------------------------------------------------------------------------------------------------------------------------------------------------------------------------------------------------------------------------------------------------------------------------------------------------------------------------------------------------------------------------------------------------------------------------------------------------------------|
|       | <p>Sum of electronic and zero-point Energies= -1462.094912</p> <p>Sum of electronic and thermal Energies= -1462.069255</p> <p>Sum of electronic and thermal Enthalpies= -1462.068311</p> <p>Sum of electronic and thermal Free Energies= -1462.15202</p> <p>C,0,-1.9048226329,-1.8385441777,-1.8429689227</p> <p>P,0,-2.711747848,-0.9665625348,-0.4738114398</p> <p>C,0,-3.3733055005,-2.2773367334,0.5871107788</p> <p>Au,0,-1.3015761172,0.5169903621,0.5543604393</p> <p>Au,0,1.3755476276,-0.0893901512,-0.87752605</p> <p>O,0,0.906518869,1.5259245775,-2.1981308991</p> <p>C,0,-4.1689186528,-0.1960043927,-1.2261637723</p> <p>O,0,0.095948968,1.9212277711,1.4670612252</p> <p>C,0,0.6209742963,2.843020705,0.7645797005</p> <p>C,0,1.9434500375,3.3404130627,1.2477653004</p> <p>C,0,0.0885728979,3.3145240414,-0.4502134272</p> <p>P,0,1.8565386176,-1.6744545538,0.7082123916</p> <p>C,0,3.1308424199,-2.8941794524,0.293831473</p> <p>C,0,0.4343516998,-2.6635986641,1.2448618936</p> <p>C,0,2.4464514678,-0.8971489339,2.2385329981</p> <p>H,0,-2.6207117516,-2.5176727242,-2.3204433054</p> <p>H,0,-1.5431664299,-1.1179130571,-2.5827815703</p> <p>H,0,-1.0539213416,-2.4172207537,-1.4709971104</p> <p>H,0,-0.356198366,-1.9957052101,1.6065057772</p> <p>H,0,0.0473089775,-3.2590872344,0.4129603541</p> <p>H,0,0.7413516912,-3.3362723452,2.0544468858</p> <p>H,0,1.8426779591,3.7321294832,2.2661042517</p> <p>H,0,2.6424643016,2.4957201651,1.3024816326</p> <p>H,0,2.3661064266,4.1167806373,0.6065012544</p> <p>H,0,-0.9822084909,3.140032857,-0.5912549481</p> <p>H,0,0.4439377128,4.2882602338,-0.7883532135</p> <p>H,0,-3.9563522322,-1.8394454925,1.4020281875</p> <p>H,0,-4.0190732708,-2.9368064083,-0.004191797</p> <p>H,0,-2.555917288,-2.8651270535,1.0154698597</p> <p>H,0,-4.7707731498,0.2990658676,-0.4591078455</p> <p>H,0,-3.854301648,0.5514389485,-1.9601852425</p> <p>H,0,-4.7764117966,-0.959062957,-1.7261555523</p> <p>H,0,3.3651465398,-0.3354106174,2.0465233062</p> <p>H,0,1.6854882329,-0.2100971327,2.6223299077</p> <p>H,0,2.647423184,-1.6662862765,2.9937466531</p> <p>H,0,4.0715607036,-2.3881903911,0.0593021294</p> <p>H,0,3.2842760181,-3.5672635551,1.1450381078</p> <p>H,0,2.8200775336,-3.4780792025,-0.5770305608</p> <p>H,0,1.7232491483,1.8148062139,-2.6233881699</p> <p>H,0,0.5854401862,2.4358570792,-1.360723681</p> |
| TSC/D | <p>c</p> <p>p 1 pc2</p> <p>c 2 cp3 1 cpc3</p> <p>c 2 cp4 3 cpc4 1 dih4 0</p> <p>au 2 aup5 3 aupc5 4 dih5 0</p> <p>o 5 oau6 2 oaup6 3 dih6 0</p> <p>c 6 co7 5 coau7 2 dih7 0</p> <p>c 7 cc8 6 cco8 5 dih8 0</p> <p>au 5 auau9 2 auaup9 1 dih9 0</p> <p>p 9 pau10 5 pauau10 2 dih10 0</p> <p>c 10 cp11 9 cpau11 5 dih11 0</p> <p>o 9 oau12 5 oauau12 2 dih12 0</p> <p>c 7 cc13 6 cco13 5 dih13 0</p>                                                                                                                                                                                                                                                                                                                                                                                                                                                                                                                                                                                                                                                                                                                                                                                                                                                                                                                                                                                                                                                                                                                                                                                                                                                                                                                                                                                                                                                                                                                                                                                                                                                                                                                                                                                                                                                                                                                                                                                     |

|            |          |      |    |        |   |       |   |
|------------|----------|------|----|--------|---|-------|---|
| c          | 10       | cp14 | 9  | cpau14 | 5 | dih14 | 0 |
| c          | 10       | cp15 | 9  | cpau15 | 5 | dih15 | 0 |
| h          | 1        | hc16 | 2  | hcp16  | 4 | dih16 | 0 |
| h          | 1        | hc17 | 2  | hcp17  | 4 | dih17 | 0 |
| h          | 1        | hc18 | 2  | hcp18  | 4 | dih18 | 0 |
| h          | 15       | hc19 | 10 | hcp19  | 9 | dih19 | 0 |
| h          | 15       | hc20 | 10 | hcp20  | 9 | dih20 | 0 |
| h          | 15       | hc21 | 10 | hcp21  | 9 | dih21 | 0 |
| h          | 13       | hc22 | 7  | hcc22  | 6 | dih22 | 0 |
| h          | 13       | hc23 | 7  | hcc23  | 6 | dih23 | 0 |
| h          | 13       | hc24 | 7  | hcc24  | 6 | dih24 | 0 |
| h          | 8        | hc25 | 7  | hcc25  | 6 | dih25 | 0 |
| h          | 8        | hc26 | 7  | hcc26  | 6 | dih26 | 0 |
| h          | 4        | hc27 | 2  | hcp27  | 1 | dih27 | 0 |
| h          | 4        | hc28 | 2  | hcp28  | 1 | dih28 | 0 |
| h          | 4        | hc29 | 2  | hcp29  | 1 | dih29 | 0 |
| h          | 3        | hc30 | 2  | hcp30  | 1 | dih30 | 0 |
| h          | 3        | hc31 | 2  | hcp31  | 1 | dih31 | 0 |
| h          | 3        | hc32 | 2  | hcp32  | 1 | dih32 | 0 |
| h          | 11       | hc33 | 10 | hcp33  | 9 | dih33 | 0 |
| h          | 11       | hc34 | 10 | hcp34  | 9 | dih34 | 0 |
| h          | 11       | hc35 | 10 | hcp35  | 9 | dih35 | 0 |
| h          | 14       | hc36 | 10 | hcp36  | 9 | dih36 | 0 |
| h          | 14       | hc37 | 10 | hcp37  | 9 | dih37 | 0 |
| h          | 14       | hc38 | 10 | hcp38  | 9 | dih38 | 0 |
| h          | 12       | ho39 | 9  | hoau39 | 5 | dih39 | 0 |
| h          | 12       | ho40 | 9  | hoau40 | 5 | dih40 | 0 |
| Variables: |          |      |    |        |   |       |   |
| pc2        | 1.81408  |      |    |        |   |       |   |
| cp3        | 1.81282  |      |    |        |   |       |   |
| cpc3       | 104.069  |      |    |        |   |       |   |
| cp4        | 1.81356  |      |    |        |   |       |   |
| cpc4       | 104.358  |      |    |        |   |       |   |
| dih4       | -109.173 |      |    |        |   |       |   |
| aup5       | 2.2946   |      |    |        |   |       |   |
| aupc5      | 115.288  |      |    |        |   |       |   |
| dih5       | -127.04  |      |    |        |   |       |   |
| oau6       | 2.14934  |      |    |        |   |       |   |
| oaup6      | 177.44   |      |    |        |   |       |   |
| dih6       | 167.433  |      |    |        |   |       |   |
| co7        | 1.3131   |      |    |        |   |       |   |
| coau7      | 117.478  |      |    |        |   |       |   |
| dih7       | 99.555   |      |    |        |   |       |   |
| cc8        | 1.36469  |      |    |        |   |       |   |
| cco8       | 125.026  |      |    |        |   |       |   |
| dih8       | 23.221   |      |    |        |   |       |   |
| auau9      | 3.13864  |      |    |        |   |       |   |
| auaup9     | 99.345   |      |    |        |   |       |   |
| dih9       | -6.781   |      |    |        |   |       |   |
| pau10      | 2.30615  |      |    |        |   |       |   |
| pauau10    | 89.972   |      |    |        |   |       |   |
| dih10      | -90.115  |      |    |        |   |       |   |
| cp11       | 1.8145   |      |    |        |   |       |   |
| cpau11     | 112.333  |      |    |        |   |       |   |
| dih11      | -78.788  |      |    |        |   |       |   |
| oau12      | 2.34156  |      |    |        |   |       |   |
| oauau12    | 99.151   |      |    |        |   |       |   |
| dih12      | 69.195   |      |    |        |   |       |   |

|        |          |
|--------|----------|
| cc13   | 1.49741  |
| cco13  | 114.119  |
| dih13  | -156.794 |
| cp14   | 1.81371  |
| cpau14 | 117.008  |
| dih14  | 160.479  |
| cp15   | 1.81541  |
| cpau15 | 114.021  |
| dih15  | 38.556   |
| hc16   | 1.09627  |
| hcp16  | 109.496  |
| dih16  | 52.154   |
| hc17   | 1.09413  |
| hcp17  | 109.796  |
| dih17  | 171.926  |
| hc18   | 1.09469  |
| hcp18  | 110.473  |
| dih18  | -68.115  |
| hc19   | 1.0961   |
| hcp19  | 109.339  |
| dih19  | -54.335  |
| hc20   | 1.09415  |
| hcp20  | 110.341  |
| dih20  | 65.697   |
| hc21   | 1.09658  |
| hcp21  | 109.491  |
| dih21  | -174.266 |
| hc22   | 1.09348  |
| hcc22  | 112.342  |
| dih22  | 176.519  |
| hc23   | 1.09716  |
| hcc23  | 109.868  |
| dih23  | -62.815  |
| hc24   | 1.09666  |
| hcc24  | 110.653  |
| dih24  | 54.676   |
| hc25   | 1.09036  |
| hcc25  | 119.856  |
| dih25  | 11.071   |
| hc26   | 1.08704  |
| hcc26  | 120.416  |
| dih26  | 175.752  |
| hc27   | 1.09358  |
| hcp27  | 110.161  |
| dih27  | -178.079 |
| hc28   | 1.09626  |
| hcp28  | 109.527  |
| dih28  | -58.051  |
| hc29   | 1.09401  |
| hcp29  | 110.216  |
| dih29  | 61.987   |
| hc30   | 1.09382  |
| hcp30  | 110.097  |
| dih30  | 173.132  |
| hc31   | 1.09361  |
| hcp31  | 110.134  |
| dih31  | -67.045  |
| hc32   | 1.0962   |

|        |          |
|--------|----------|
| hcp32  | 109.539  |
| dih32  | 53.173   |
| hc33   | 1.09391  |
| hcp33  | 110.111  |
| dih33  | -59.999  |
| hc34   | 1.09484  |
| hcp34  | 109.712  |
| dih34  | 59.792   |
| hc35   | 1.09628  |
| hcp35  | 109.746  |
| dih35  | 179.742  |
| hc36   | 1.09364  |
| hcp36  | 110.155  |
| dih36  | 58.276   |
| hc37   | 1.0966   |
| hcp37  | 109.732  |
| dih37  | 178.51   |
| hc38   | 1.09383  |
| hcp38  | 109.87   |
| dih38  | -61.348  |
| ho39   | 0.96537  |
| hoau39 | 108.913  |
| dih39  | -140.998 |
| ho40   | 0.96601  |
| hoau40 | 108.405  |
| dih40  | 103.768  |

**Table S2.** Geometries and energetics for the calculated structures used for comparison of theoretical IR spectra with the helium tagging IRPD spectra. The structures were optimized at the B3LYP-D3/6-311+G\*(SDD:Au) level of theory.

|           |                                                                                                                                                                                                                                                                                                                                                                                                                                                                                                                                                                                                                                                                                                                                                                                                                                                                                                                                                                                                                                                                                                                                                                         |
|-----------|-------------------------------------------------------------------------------------------------------------------------------------------------------------------------------------------------------------------------------------------------------------------------------------------------------------------------------------------------------------------------------------------------------------------------------------------------------------------------------------------------------------------------------------------------------------------------------------------------------------------------------------------------------------------------------------------------------------------------------------------------------------------------------------------------------------------------------------------------------------------------------------------------------------------------------------------------------------------------------------------------------------------------------------------------------------------------------------------------------------------------------------------------------------------------|
| <b>1a</b> | <p>Ac_vicAu2_a.log</p> <p>Low frequencies --- -10.2622 -5.7938 -0.0016 -0.0015 -0.0010 4.6865</p> <p>Low frequencies --- 17.5840 21.0821 24.7129</p> <p>Zero-point correction= 0.305835 (Hartree/Particle)</p> <p>Thermal correction to Energy= 0.330142</p> <p>Thermal correction to Enthalpy= 0.331086</p> <p>Thermal correction to Gibbs Free Energy= 0.246576</p> <p>Sum of electronic and zero-point Energies= -1386.139746</p> <p>Sum of electronic and thermal Energies= -1386.115440</p> <p>Sum of electronic and thermal Enthalpies= -1386.114495</p> <p>Sum of electronic and thermal Free Energies= -1386.199005</p> <p>C,0,-1.5794719191,-0.5911120762,-0.0575535581</p> <p>O,0,-1.8761441338,-0.8476907576,1.1455715663</p> <p>C,0,-0.3197996271,-0.0296457937,-0.4715909785</p> <p>C,0,-2.6370048262,-0.9089194645,-1.0769973427</p> <p>Au,0,1.0007442179,-1.730785051,-0.5176177114</p> <p>H,0,2.554618238,-5.8206539961,-1.470541242</p> <p>C,0,2.9652934085,-4.1842361272,1.0590367107</p> <p>C,0,4.0702953402,-3.1781061529,-1.4240394504</p> <p>C,0,1.8230459717,-5.0090016961,-1.4698884509</p> <p>P,0,2.4813579896,-3.5438455922,-0.5902375004</p> |
|-----------|-------------------------------------------------------------------------------------------------------------------------------------------------------------------------------------------------------------------------------------------------------------------------------------------------------------------------------------------------------------------------------------------------------------------------------------------------------------------------------------------------------------------------------------------------------------------------------------------------------------------------------------------------------------------------------------------------------------------------------------------------------------------------------------------------------------------------------------------------------------------------------------------------------------------------------------------------------------------------------------------------------------------------------------------------------------------------------------------------------------------------------------------------------------------------|



|           |                                                                                                                                                                                                                                                                                                                                                                                                                                                                                                                                                                                                                                                                                                                                                                                                                                                                                                                                                                                                                                                                                                                                                                                                                                                                                                                                                                                                                                                                                         |
|-----------|-----------------------------------------------------------------------------------------------------------------------------------------------------------------------------------------------------------------------------------------------------------------------------------------------------------------------------------------------------------------------------------------------------------------------------------------------------------------------------------------------------------------------------------------------------------------------------------------------------------------------------------------------------------------------------------------------------------------------------------------------------------------------------------------------------------------------------------------------------------------------------------------------------------------------------------------------------------------------------------------------------------------------------------------------------------------------------------------------------------------------------------------------------------------------------------------------------------------------------------------------------------------------------------------------------------------------------------------------------------------------------------------------------------------------------------------------------------------------------------------|
|           | <p> Au,0,-0.5294220071,-0.7799726894,2.7766284028<br/> P,0,0.8532091239,-0.7561073153,4.5863541822<br/> C,0,2.4570334318,-1.5761304528,4.2639513554<br/> C,0,1.2807804164,0.9316544896,5.1437620046<br/> C,0,0.168250492,-1.5929953116,6.0599750612<br/> H,0,3.881850471,-2.8696082454,-2.4534072422<br/> H,0,4.7172450164,-4.0585823349,-1.4282483225<br/> H,0,4.5807149644,-2.3610561408,-0.9118954665<br/> H,0,3.4528399696,-3.3942031886,1.6322380055<br/> H,0,2.0758474679,-4.5098529146,1.6008035242<br/> H,0,3.6516531483,-5.028603963,0.9610778708<br/> H,0,1.5843673824,-4.743196574,-2.500730562<br/> H,0,0.9079078172,-5.352283106,-0.985046097<br/> H,0,2.2896271827,-2.6242634775,4.0124908631<br/> H,0,3.1019253561,-1.5172816728,5.1436648867<br/> H,0,2.9520012179,-1.089968911,3.4220787352<br/> H,0,1.7699116945,1.4771419396,4.335635912<br/> H,0,0.3730698208,1.4693515353,5.4208458318<br/> H,0,1.9497948646,0.8899052771,6.006539065<br/> H,0,0.8815536066,-1.5513653703,6.8865303587<br/> H,0,-0.0531263176,-2.6354997632,5.8276871604<br/> H,0,-0.7589318006,-1.1046552218,6.3628964461<br/> H,0,-0.3323235763,0.4115058187,-1.4673708635<br/> H,0,-2.2071585652,-1.0984506753,-2.0609137775<br/> H,0,-3.2401922712,-1.7572258044,-0.7545285888<br/> H,0,-3.3001967841,-0.0411193989,-1.1634527353<br/> H,0,0.1155208153,0.6447951492,0.2682671823 </p>                                                                                                         |
| <b>1b</b> | <p>Ac_vicAu2_b.log</p> <p> Low frequencies --- -0.9640 -0.0017 -0.0016 0.0010 3.0678 8.9078<br/> Low frequencies --- 13.9729 15.0821 22.7241 </p> <p> Zero-point correction= 0.306015 (Hartree/Particle)<br/> Thermal correction to Energy= 0.330260<br/> Thermal correction to Enthalpy= 0.331204<br/> Thermal correction to Gibbs Free Energy= 0.246159<br/> Sum of electronic and zero-point Energies= -1386.136698<br/> Sum of electronic and thermal Energies= -1386.112453<br/> Sum of electronic and thermal Enthalpies= -1386.111509<br/> Sum of electronic and thermal Free Energies= -1386.196554 </p> <p> C,0,-0.1192432291,0.3072383951,-0.014223764<br/> P,0,-0.0389572484,0.2132886889,1.8137193073<br/> C,0,1.7527522001,0.1783668031,2.1950348241<br/> Au,0,-1.2217002529,1.8982795199,2.92807087<br/> C,0,-2.3895195383,3.3468713905,4.0258918622<br/> C,0,-1.9530105518,4.6075602529,3.5087045876<br/> C,0,-0.7163436417,5.2708529039,4.0605429419<br/> O,0,-2.599074648,5.1735489692,2.5763312065<br/> Au,0,-2.2615103943,7.005626816,1.5966759311<br/> P,0,-2.0342161673,8.9884595973,0.4949971214<br/> C,0,-3.5907044653,9.5770392943,-0.2622213262<br/> C,0,-0.6255825997,-1.4752868154,2.2130815815<br/> C,0,-1.4776223147,10.352852932,1.5771054494<br/> C,0,-0.8222951631,8.9328639856,-0.8728658387<br/> H,0,2.2472133082,-0.6352817043,1.6587934454<br/> H,0,-0.5356990756,-1.6532528925,3.2856614535<br/> H,0,-0.0391168313,-2.2244245509,1.6757439543 </p> |

|    |                                                                                                                                                                                                                                                                                                                                                                                                                                                                                                                                                                                                                                                                                                                                                                                                                                                                                                                                                                                                                                                                                                                                                                                                                                                                                                                                                                                                                                                                                                                                                                                                                                                                                                                                                                                      |
|----|--------------------------------------------------------------------------------------------------------------------------------------------------------------------------------------------------------------------------------------------------------------------------------------------------------------------------------------------------------------------------------------------------------------------------------------------------------------------------------------------------------------------------------------------------------------------------------------------------------------------------------------------------------------------------------------------------------------------------------------------------------------------------------------------------------------------------------------------------------------------------------------------------------------------------------------------------------------------------------------------------------------------------------------------------------------------------------------------------------------------------------------------------------------------------------------------------------------------------------------------------------------------------------------------------------------------------------------------------------------------------------------------------------------------------------------------------------------------------------------------------------------------------------------------------------------------------------------------------------------------------------------------------------------------------------------------------------------------------------------------------------------------------------------|
|    | H,0,-1.6759782861,-1.578143605,1.9366926878<br>H,0,-1.1581921388,0.2470654164,-0.3417175525<br>H,0,0.2924696314,1.2586935516,-0.3540875378<br>H,0,0.4466941762,-0.5098476662,-0.4681513088<br>H,0,1.8984359051,0.0390544265,3.2672645736<br>H,0,2.2112945028,1.1257656661,1.9077914232<br>H,0,-2.1970120625,10.5029106934,2.3831773472<br>H,0,-1.3839479566,11.2781515913,1.0038083838<br>H,0,-0.511241815,10.1060844926,2.0187168719<br>H,0,0.1596669818,8.6550084656,-0.4876391876<br>H,0,-1.1280986774,8.1881459233,-1.6088178561<br>H,0,-0.7535809709,9.9091642647,-1.3585153109<br>H,0,-3.4259934791,10.5272161125,-0.7758798041<br>H,0,-4.349548955,9.713291595,0.5093840761<br>H,0,-3.9569062338,8.8406910887,-0.9787601358<br>H,0,-2.1127011027,3.1697771863,5.0651325482<br>H,0,-0.2034871973,4.653581213,4.7967069713<br>H,0,-0.0260564731,5.5062457242,3.2460469563<br>H,0,-1.0043867409,6.2177466468,4.5278940835<br>H,0,-3.4339761575,3.1248052248,3.8121444088                                                                                                                                                                                                                                                                                                                                                                                                                                                                                                                                                                                                                                                                                                                                                                                                         |
| 1c | Ac_gemAu2.log<br><br>Low frequencies --- -5.1170 -0.0016 -0.0013 -0.0006 5.2292 10.4035<br>Low frequencies --- 13.1970 15.8705 23.6205<br><br>Zero-point correction= 0.306233 (Hartree/Particle)<br>Thermal correction to Energy= 0.330885<br>Thermal correction to Enthalpy= 0.331829<br>Thermal correction to Gibbs Free Energy= 0.245657<br>Sum of electronic and zero-point Energies= -1386.121260<br>Sum of electronic and thermal Energies= -1386.096609<br>Sum of electronic and thermal Enthalpies= -1386.095665<br>Sum of electronic and thermal Free Energies= -1386.181836<br><br>Au,0,1.5495822403,0.2351027817,-0.1662549717<br>Au,0,-1.550287542,0.2357305319,-0.1641332428<br>C,0,-0.0003448306,1.6763161247,-0.5597055669<br>P,0,3.3612342591,-1.2120002825,0.1350886282<br>P,0,-3.3602582135,-1.2131913806,0.1361530328<br>C,0,-3.0406313589,-2.6047949484,1.2837817577<br>C,0,-4.8593902463,-0.3999299634,0.8033583871<br>C,0,-3.9185264258,-2.0108219036,-1.4151573898<br>C,0,3.4107271822,-2.0290856543,1.7738784502<br>C,0,3.4184962071,-2.5889889419,-1.0712032615<br>C,0,4.9917351301,-0.3932781743,-0.0201095959<br>H,0,-4.2168384578,-1.2486249025,-2.1366223152<br>H,0,-4.7666487355,-2.6725169241,-1.2244430751<br>H,0,-3.1030165493,-2.5912727754,-1.8487916404<br>H,0,-2.2058784305,-3.2030167728,0.9152171423<br>H,0,-2.7784122188,-2.2186115604,2.2697801636<br>H,0,-3.9239948373,-3.2417417934,1.3744725767<br>H,0,-5.6750878755,-1.1195387641,0.9056373711<br>H,0,-5.1729234513,0.4020028055,0.1333860662<br>H,0,-4.6434263477,0.0355472911,1.7800993387<br>H,0,2.5155275066,-3.1952937735,-0.98437675<br>H,0,4.2921348725,-3.2207205341,-0.8935904158<br>H,0,3.4675570343,-2.1907773285,-2.0855011631<br>H,0,5.089078389,0.053591156,-1.0104421846 |

|    |                                                                                                                                                                                                                                                                                                                                                                                                                                                                                                                                                                                                                                                                                                                                                                                                                                                                                                                                                                                                                                                                                                                                                                                                                                                                                                                                                                                                                                                                                                                                                                                                                                                                                                                                                                                                                                                                                                                                                                                                                                                                                                                            |
|----|----------------------------------------------------------------------------------------------------------------------------------------------------------------------------------------------------------------------------------------------------------------------------------------------------------------------------------------------------------------------------------------------------------------------------------------------------------------------------------------------------------------------------------------------------------------------------------------------------------------------------------------------------------------------------------------------------------------------------------------------------------------------------------------------------------------------------------------------------------------------------------------------------------------------------------------------------------------------------------------------------------------------------------------------------------------------------------------------------------------------------------------------------------------------------------------------------------------------------------------------------------------------------------------------------------------------------------------------------------------------------------------------------------------------------------------------------------------------------------------------------------------------------------------------------------------------------------------------------------------------------------------------------------------------------------------------------------------------------------------------------------------------------------------------------------------------------------------------------------------------------------------------------------------------------------------------------------------------------------------------------------------------------------------------------------------------------------------------------------------------------|
|    | H,0,5.0788748938,0.4002932158,0.7229738827<br>H,0,5.8004744434,-1.1123754058,0.128189808<br>H,0,4.2795339455,-2.6870961246,1.849734003<br>H,0,2.5037514923,-2.6170772183,1.9229960299<br>H,0,3.4656698835,-1.2763975276,2.5615362859<br>H,0,-0.0010305697,1.9501007485,-1.6143888413<br>C,0,0.0007447207,2.7811556231,0.2715195658<br>O,0,0.0017820521,2.7016715008,1.6068780499<br>C,0,0.0010339382,4.205053583,-0.1773937113<br>H,0,0.0002217497,4.2886656605,-1.2619260346<br>H,0,-0.875828017,4.7181727582,0.2278165232<br>H,0,0.8790659585,4.7173226503,0.2266315285<br>H,0,0.0010274457,1.7722802564,1.8852761026                                                                                                                                                                                                                                                                                                                                                                                                                                                                                                                                                                                                                                                                                                                                                                                                                                                                                                                                                                                                                                                                                                                                                                                                                                                                                                                                                                                                                                                                                                    |
| 1d | Ac_OdiAu_a.log<br><br>Low frequencies --- -9.2500 -5.9645 -2.1026 -0.0013 -0.0012 -0.0010<br>Low frequencies --- 10.7836 13.0896 16.2743<br><br>Zero-point correction= 0.305449 (Hartree/Particle)<br>Thermal correction to Energy= 0.329954<br>Thermal correction to Enthalpy= 0.330898<br>Thermal correction to Gibbs Free Energy= 0.244410<br>Sum of electronic and zero-point Energies= -1386.120601<br>Sum of electronic and thermal Energies= -1386.096096<br>Sum of electronic and thermal Enthalpies= -1386.095152<br>Sum of electronic and thermal Free Energies= -1386.181640<br><br>C,0,4.3085071212,-1.5275576504,-1.6332980999<br>P,0,3.7583125378,-0.9998026826,0.0288729649<br>Au,0,1.8081095784,0.1691370764,0.0101048291<br>O,0,-0.0078125942,1.2573442811,0.0431939023<br>Au,0,-1.806681622,0.1462274424,-0.0008134095<br>P,0,-3.7269252487,-1.07475587,-0.0419572014<br>C,0,-3.6162162459,-2.5947527013,-1.0525624025<br>C,0,5.1537256874,-0.0402280062,0.7167899526<br>C,0,3.6900598961,-2.5336684548,1.0223190062<br>C,0,-0.0010218044,2.6412344476,-0.0752385503<br>C,0,-0.9965232576,3.3238863343,0.8143565213<br>C,0,0.8404504271,3.2685732212,-0.8971295922<br>C,0,-4.2708293254,-1.6336784716,1.6120521027<br>C,0,-5.1437002294,-0.1439325077,-0.7255035996<br>H,0,3.4446058017,-2.2923208999,2.0571591931<br>H,0,4.6531697061,-3.0484736137,0.9935297634<br>H,0,2.9173711502,-3.1952591764,0.6289576505<br>H,0,3.5565138124,-2.1766988786,-2.0841355043<br>H,0,4.438765784,-0.6547317778,-2.2746253225<br>H,0,5.2553316582,-2.0685968936,-1.5675939432<br>H,0,6.0702630006,-0.6344952567,0.69438535<br>H,0,4.9355953081,0.2453379619,1.7465429392<br>H,0,5.3015068604,0.8682937453,0.1316208037<br>H,0,-3.5022999514,-2.2636540783,2.0620993264<br>H,0,-5.201020076,-2.201403142,1.5359632953<br>H,0,-4.4301853727,-0.7700763216,2.259003642<br>H,0,-5.3236102144,0.7477854983,-0.1236329908<br>H,0,-4.9245978924,0.1678621051,-1.7475326434<br>H,0,-6.0426131229,-0.7649008942,-0.7232405077<br>H,0,-4.5681153953,-3.1308139762,-1.0351010212<br>H,0,-2.8327574755,-3.2449830892,-0.6613191967 |

|           |                                                                                                                                                                                                                                                                                                                                                                                                                                                                                                                                                                                                                                                                                                                                                                                                                                                                                                                                                                                                                                                                                                                                                                                                                                                                                                                                                                                                                                                                                                                                                                                                                                                                                                                                                                                                                                                                                                                                                                                                                                                                                                                                                                                                                                                                                                                                                                                                        |
|-----------|--------------------------------------------------------------------------------------------------------------------------------------------------------------------------------------------------------------------------------------------------------------------------------------------------------------------------------------------------------------------------------------------------------------------------------------------------------------------------------------------------------------------------------------------------------------------------------------------------------------------------------------------------------------------------------------------------------------------------------------------------------------------------------------------------------------------------------------------------------------------------------------------------------------------------------------------------------------------------------------------------------------------------------------------------------------------------------------------------------------------------------------------------------------------------------------------------------------------------------------------------------------------------------------------------------------------------------------------------------------------------------------------------------------------------------------------------------------------------------------------------------------------------------------------------------------------------------------------------------------------------------------------------------------------------------------------------------------------------------------------------------------------------------------------------------------------------------------------------------------------------------------------------------------------------------------------------------------------------------------------------------------------------------------------------------------------------------------------------------------------------------------------------------------------------------------------------------------------------------------------------------------------------------------------------------------------------------------------------------------------------------------------------------|
|           | H,0,-3.3697320229,-2.3372975401,-2.0833810301<br>H,0,-2.0215652877,3.0496362584,0.5382434344<br>H,0,-0.8480209287,3.0217089014,1.8550624246<br>H,0,-0.9101689454,4.408341516,0.7475518188<br>H,0,1.5242025867,2.7224407492,-1.5375530897<br>H,0,0.8605497943,4.3489378816,-0.9490811471                                                                                                                                                                                                                                                                                                                                                                                                                                                                                                                                                                                                                                                                                                                                                                                                                                                                                                                                                                                                                                                                                                                                                                                                                                                                                                                                                                                                                                                                                                                                                                                                                                                                                                                                                                                                                                                                                                                                                                                                                                                                                                                |
| <b>1e</b> | Ac_gemAu2_c.log<br><br>Low frequencies --- -5.9025 -3.6603 0.0004 0.0006 0.0009 3.2859<br>Low frequencies --- 10.3657 11.9710 23.8170<br><br>Zero-point correction= 0.306190 (Hartree/Particle)<br>Thermal correction to Energy= 0.330737<br>Thermal correction to Enthalpy= 0.331681<br>Thermal correction to Gibbs Free Energy= 0.245642<br>Sum of electronic and zero-point Energies= -1386.117888<br>Sum of electronic and thermal Energies= -1386.093341<br>Sum of electronic and thermal Enthalpies= -1386.092397<br>Sum of electronic and thermal Free Energies= -1386.178436<br><br>C,0,-0.0021905943,-0.0190758362,-0.0088906727<br>Au,0,-0.0032176982,-0.0392459188,2.1297094137<br>Au,0,2.1358339743,-0.0388096736,0.0271623882<br>P,0,4.5326788456,0.0943468583,-0.1759931016<br>P,0,-0.2534112153,0.0909074062,4.5224184178<br>C,0,-2.0368777014,0.016356819,5.097240208<br>C,0,0.5985709332,-1.2739261351,5.4865803353<br>C,0,0.4073264426,1.6755781354,5.2764493581<br>C,0,5.5004471814,-0.6611948019,1.2420744248<br>C,0,5.1751097259,1.8521542878,-0.2933804892<br>C,0,5.2186656613,-0.7503694955,-1.7031991731<br>C,0,-0.6147254374,-1.0988478766,-0.633839577<br>O,0,-1.5606260363,-0.809363438,-1.5959123949<br>C,0,-0.3670391799,-2.5693458876,-0.3839809915<br>H,0,4.7345492048,2.34597764,-1.1642866778<br>H,0,6.2661898467,1.8514799435,-0.3914721604<br>H,0,4.8921942676,2.4086897792,0.6047473724<br>H,0,5.2383451564,-0.1550711422,2.1757514018<br>H,0,5.2504741244,-1.7222422061,1.333520936<br>H,0,6.5765516709,-0.5577450472,1.0643652946<br>H,0,6.305772203,-0.6235444141,-1.7500962951<br>H,0,4.7650605177,-0.3138737474,-2.5976540473<br>H,0,4.9804362622,-1.817602123,-1.673608174<br>H,0,1.4799864827,1.7584398785,5.0789470204<br>H,0,0.2365781337,1.6801114364,6.3585855374<br>H,0,-0.0997376037,2.534398057,4.8273240703<br>H,0,-2.6002400857,0.8421094889,4.6532310271<br>H,0,-2.4875975782,-0.9273472141,4.7768296663<br>H,0,-2.0864002266,0.0893711913,6.1891757105<br>H,0,0.4282535148,-1.1412374864,6.560640256<br>H,0,1.6735538374,-1.2515608105,5.2854058511<br>H,0,0.202670765,-2.24536279,5.1763406696<br>H,0,-0.3722742215,0.9407770658,-0.3842267594<br>H,0,0.3920556351,-2.7090880071,0.3864875024<br>H,0,-1.2921488198,-3.0669580341,-0.0593368659<br>H,0,-0.0275991605,-3.065435336,-1.3045877227<br>H,0,-1.9706467965,-1.5969350725,-2.0141630359 |
| <b>1f</b> | Ac_gemAu2_b.log                                                                                                                                                                                                                                                                                                                                                                                                                                                                                                                                                                                                                                                                                                                                                                                                                                                                                                                                                                                                                                                                                                                                                                                                                                                                                                                                                                                                                                                                                                                                                                                                                                                                                                                                                                                                                                                                                                                                                                                                                                                                                                                                                                                                                                                                                                                                                                                        |

|    |                                                                                                                                                                                                                                                                                                                                                                                                                                                                                                                                                                                                                                                                                                                                                                                                                                                                                                                                                                                                                                                                                                                                                                                                                                                                                                                                                                                                                                                                                                                                                                                                                                                                                                                                                                                                                                                                                                                                                                                                                                                                                                                                                                                                                                                                                                                                                                                                                                                                                      |
|----|--------------------------------------------------------------------------------------------------------------------------------------------------------------------------------------------------------------------------------------------------------------------------------------------------------------------------------------------------------------------------------------------------------------------------------------------------------------------------------------------------------------------------------------------------------------------------------------------------------------------------------------------------------------------------------------------------------------------------------------------------------------------------------------------------------------------------------------------------------------------------------------------------------------------------------------------------------------------------------------------------------------------------------------------------------------------------------------------------------------------------------------------------------------------------------------------------------------------------------------------------------------------------------------------------------------------------------------------------------------------------------------------------------------------------------------------------------------------------------------------------------------------------------------------------------------------------------------------------------------------------------------------------------------------------------------------------------------------------------------------------------------------------------------------------------------------------------------------------------------------------------------------------------------------------------------------------------------------------------------------------------------------------------------------------------------------------------------------------------------------------------------------------------------------------------------------------------------------------------------------------------------------------------------------------------------------------------------------------------------------------------------------------------------------------------------------------------------------------------------|
|    | <p>Low frequencies --- -2.6862 0.0003 0.0006 0.0015 4.9081 7.9801<br/> Low frequencies --- 12.9601 15.2028 26.0234</p> <p>Zero-point correction= 0.305913 (Hartree/Particle)<br/> Thermal correction to Energy= 0.330622<br/> Thermal correction to Enthalpy= 0.331566<br/> Thermal correction to Gibbs Free Energy= 0.245642<br/> Sum of electronic and zero-point Energies= -1386.117512<br/> Sum of electronic and thermal Energies= -1386.092803<br/> Sum of electronic and thermal Enthalpies= -1386.091859<br/> Sum of electronic and thermal Free Energies= -1386.177783</p> <p>C,0,-2.9081488129,-2.5704552742,1.3676085348<br/> P,0,-3.2646477952,-1.2462635352,0.1521117921<br/> C,0,-3.7733210883,-2.138858114,-1.3640933264<br/> Au,0,-1.5019358961,0.2428012093,-0.1799842873<br/> C,0,-0.0005996151,1.7331008649,-0.6042262133<br/> C,0,0.0021980378,2.8103187047,0.2453701063<br/> C,0,-0.0000511652,4.2467473375,-0.1858015528<br/> Au,0,1.5025296611,0.2418464246,-0.1881153626<br/> P,0,3.2676701442,-1.2457028243,0.1395279616<br/> C,0,4.9265159519,-0.4729083839,0.0648149666<br/> C,0,3.2315505182,-2.0986027622,1.760487927<br/> C,0,3.3390371296,-2.5991622174,-1.0928431221<br/> C,0,-4.8043083221,-0.465946536,0.7648498187<br/> O,0,0.0061670985,2.6045494686,1.5796802768<br/> H,0,-4.0879137111,-1.4243471121,-2.1262317584<br/> H,0,-4.5999372771,-2.8211350515,-1.1520458333<br/> H,0,-2.9308398267,-2.70918258,-1.7580650523<br/> H,0,-2.0497971716,-3.1548629451,1.0329762089<br/> H,0,-2.6658938954,-2.1282656201,2.3351597193<br/> H,0,-3.7693447933,-3.2330989971,1.4823667224<br/> H,0,-5.5921035173,-1.2124175624,0.891708734<br/> H,0,-5.1413172225,0.2916283759,0.0557839316<br/> H,0,-4.6167196328,0.0212157085,1.7228317447<br/> H,0,2.4147319675,-3.1776950124,-1.0610225452<br/> H,0,4.1835347765,-3.262022406,-0.889543993<br/> H,0,3.4467204005,-2.1812705758,-2.0948379382<br/> H,0,5.0736431313,-0.0075079952,-0.9109705186<br/> H,0,5.0094303288,0.3014288787,0.8288608306<br/> H,0,5.7081600711,-1.2190896147,0.22640573<br/> H,0,4.0814181088,-2.7780700893,1.8598314167<br/> H,0,2.3055585224,-2.6672006455,1.8581211318<br/> H,0,3.2667488436,-1.3627777776,2.5652083062<br/> H,0,-0.00349825,2.0256533346,-1.6528562954<br/> H,0,-0.0026771424,4.3437131304,-1.2694089732<br/> H,0,-0.8827116026,4.7625322241,0.2086193074<br/> H,0,0.8832196497,4.7647299432,0.2045556448<br/> H,0,0.0079881197,3.4382714794,2.0679640725</p> |
| 2a | <p>AuAcetone.log\<br/> Low frequencies --- -12.1723 -4.3393 -0.0015 -0.0010 0.0016 7.8828<br/> Low frequencies --- 18.4298 41.8366 42.4478</p> <p>Zero-point correction= 0.200705 (Hartree/Particle)<br/> Thermal correction to Energy= 0.215842<br/> Thermal correction to Enthalpy= 0.216786<br/> Thermal correction to Gibbs Free Energy= 0.155361</p>                                                                                                                                                                                                                                                                                                                                                                                                                                                                                                                                                                                                                                                                                                                                                                                                                                                                                                                                                                                                                                                                                                                                                                                                                                                                                                                                                                                                                                                                                                                                                                                                                                                                                                                                                                                                                                                                                                                                                                                                                                                                                                                            |

|           |                                                                                                                                                                                                                                                                                                                                                                                                                                                                                                                                                                                                                                                                                                                                                                                                                                                                                                                                                                                                                                                                                                                                                                                                                                                                                                                                                                                                                                                                               |
|-----------|-------------------------------------------------------------------------------------------------------------------------------------------------------------------------------------------------------------------------------------------------------------------------------------------------------------------------------------------------------------------------------------------------------------------------------------------------------------------------------------------------------------------------------------------------------------------------------------------------------------------------------------------------------------------------------------------------------------------------------------------------------------------------------------------------------------------------------------------------------------------------------------------------------------------------------------------------------------------------------------------------------------------------------------------------------------------------------------------------------------------------------------------------------------------------------------------------------------------------------------------------------------------------------------------------------------------------------------------------------------------------------------------------------------------------------------------------------------------------------|
|           | <p>Sum of electronic and zero-point Energies= -789.814526<br/> Sum of electronic and thermal Energies= -789.799389<br/> Sum of electronic and thermal Enthalpies= -789.798445<br/> Sum of electronic and thermal Free Energies= -789.859870</p> <p>C,0,0.0421257506,0.0767488842,-0.0198878796<br/> P,0,0.0281537107,0.0437741085,1.8057971291<br/> C,0,1.7797740977,0.0144374327,2.3208595263<br/> C,0,-0.6257103758,1.6647513837,2.3341306695<br/> Au,0,-1.1664275656,-1.7027842547,2.6641799967<br/> O,0,-2.2438244359,-3.3232921229,3.6057766001<br/> C,0,-3.0463183232,-4.170795803,3.1954723414<br/> C,0,-3.4693343544,-4.2535370757,1.7626345624<br/> C,0,-3.610411623,-5.1567056479,4.1670335259<br/> H,0,0.4811393947,-0.8439231799,-0.4061688397<br/> H,0,0.6287292162,0.9281519066,-0.37295444<br/> H,0,-0.9764972334,0.163490999,-0.4000802084<br/> H,0,-1.6572851493,1.7782548514,1.9987072654<br/> H,0,-0.6044919439,1.7379064318,3.4221673319<br/> H,0,-0.0200926798,2.4687632828,1.9092944179<br/> H,0,2.3077409949,0.8713179437,1.895651866<br/> H,0,2.2546022124,-0.9053043377,1.9770640321<br/> H,0,1.8492603264,0.0551369324,3.4085485361<br/> H,0,-3.2315480451,-3.3397882071,1.2177455456<br/> H,0,-2.9348879857,-5.0894276869,1.2952482691<br/> H,0,-4.5347241384,-4.4788644781,1.6777696189<br/> H,0,-3.0601571523,-5.1417186836,5.1057538436<br/> H,0,-4.6565370316,-4.8918832861,4.3628042245<br/> H,0,-3.6206137188,-6.1632714859,3.7407282785</p> |
| <b>2b</b> | <p>Au_enol_1.log</p> <p>Low frequencies --- -7.0519 -4.5348 -0.0005 -0.0002 0.0014 5.0207<br/> Low frequencies --- 15.3260 45.1480 55.4015</p> <p>Zero-point correction= 0.201888 (Hartree/Particle)<br/> Thermal correction to Energy= 0.216457<br/> Thermal correction to Enthalpy= 0.217401<br/> Thermal correction to Gibbs Free Energy= 0.157455<br/> Sum of electronic and zero-point Energies= -789.793703<br/> Sum of electronic and thermal Energies= -789.779135<br/> Sum of electronic and thermal Enthalpies= -789.778191<br/> Sum of electronic and thermal Free Energies= -789.838136</p> <p>C,0,0.0789471426,-0.0084880419,0.0088081995<br/> P,0,-0.0201710013,-0.0430863124,1.8338918007<br/> Au,0,2.079206396,-0.0768243479,2.855408247<br/> C,0,4.1404974026,0.0287773985,3.6753045388<br/> C,0,3.9744119559,-0.9709513236,4.6325029861<br/> C,0,3.4632663574,-0.7410682985,6.012521793<br/> C,0,-1.0215463803,1.4145961962,2.2968610477<br/> C,0,-1.053882889,-1.4951925015,2.2419269631<br/> O,0,4.2740585819,-2.2404705242,4.4147314751<br/> H,0,-2.0208882454,-1.4213368862,1.7386048465<br/> H,0,-1.1845836509,1.428911291,3.3753519454<br/> H,0,-1.9890953109,1.3820648173,1.7903975086<br/> H,0,-0.5012755262,2.330348076,2.0129179478<br/> H,0,0.6240946198,0.8777626476,-0.3187848846<br/> H,0,0.6057678772,-0.8922729948,-0.3535618644</p>                                                                                                        |

|  |                                              |
|--|----------------------------------------------|
|  | H,0,-0.9245220726,0.0104637964,-0.4228263848 |
|  | H,0,-1.2166481749,-1.5461603724,3.3193082722 |
|  | H,0,-0.5548853952,-2.4111039107,1.9227003936 |
|  | H,0,4.1828606704,1.0495048805,4.0450830809   |
|  | H,0,3.0864259925,0.2714448425,6.1405804302   |
|  | H,0,2.6829851087,-1.4647809271,6.2558095625  |
|  | H,0,4.2855665312,-0.9085276553,6.7156869457  |
|  | H,0,4.791074929,-0.1756280317,2.8257381776   |
|  | H,0,4.6673410287,-2.3884313625,3.5407893413  |
